# Supplementary material for: GABA neurons in the ventral tegmental area regulate non-rapid eye movement sleep in mice
Source: eLife. 2019 Jun 4;8:e44928. doi: 10.7554/eLife.44928 (PMC6548506; doi:10.7554/eLife.44928)
Supplement: Figure 1—figure supplement 1—source data 1. [file elife-44928-fig1-figsupp1-data1.xlsx]

## Sheet: Analysis
Mice	GAD-Cre
	Mouse no	Slice No	GAD	VGAT	mCherry	GAD+VGAT	GAD+mCherry	VGAT+mCherry	GAD+VGAT+mCherry
	No1	1	65	151	47	65	45	45	45
		2	46	172	46	42	43	42	42
		3	64	267	59	60	54	51	51
	No2	1	72	224	62	68	61	59	59
		2	68	193	60	68	60	60	60
		3	45	177	47	43	45	45	45
	No3	1	41	167	43	40	41	40	40
		2	66	182	52	63	52	51	51
		3	73	167	58	70	53	53	53
	No4	1	97	245	84	93	80	80	80
		2	47	167	48	47	47	47	47
		3	86	183	82	85	81	81	81
Analysis											Cre specificity ratio		putative GABAergic ratio
											(GAD+mCherry)/mCherry		(triple)/mCherry		total neurons	GAD+Vgat	GAD only	Vgat only		(GAD+Vgat)/Vgat
	No1		175	590	152	167	142	138	138		93.4211		90.7895		598	27.9264	1.33779	70.7358		28.3051	95.4286
	No2		185	594	169	179	166	164	164		98.2249		97.0414		600	29.8333	1	69.1667		30.1347	96.7568
	No3		180	516	153	173	146	144	144		95.4248		94.1176		523	33.0784	1.33843	65.5832		33.5271	96.1111
	No4		230	595	214	225	208	208	208		97.1963		97.1963		600	37.5	0.833333	61.6667		37.8151	97.8261
		Ave	192.5	573.75	172	186	165.5	163.5	163.5		96.0668		94.7862		2321	32.0845	1.12739	66.7881		32.4455	96.5306
			4	4	4	4	4	4	4		4		4			4	4	4		4	4
		SEM	12.6656	19.2803	14.5316	13.2288	15.1079	15.8403	15.8403		1.05455		1.50873			2.09509	0.126328	2.01913		2.09137	0.509891
