# Supplementary material for: GABA neurons in the ventral tegmental area regulate non-rapid eye movement sleep in mice
Source: eLife. 2019 Jun 4;8:e44928. doi: 10.7554/eLife.44928 (PMC6548506; doi:10.7554/eLife.44928)
Supplement: Figure 1—source data 1. [file elife-44928-fig1-data1.xlsx]

## Sheet: Cell count
									Percent
		Mouse#	Slice	DA	GFP	Merge	Total	DA- GFP+	DA	GFP	Merge	DA- GFP+		per mice total
		1	1L	130	56	2	188	54	69.1489	29.7872	1.06383	96.4286		345
			2L	105	52	0	157	52	66.879	33.121	0	100
		2	1L	166	124	0	290	124	57.2414	42.7586	0	100		671
			2L	216	163	2	381	161	56.6929	42.7822	0.524934	98.773
		3	1L	182	130	3	315	127	57.7778	41.2698	0.952381	97.6923		939
			2L	197	119	0	316	119	62.3418	37.6582	0	100
			3L	198	109	1	308	108	64.2857	35.3896	0.324675	99.0826
		4	1L	191	81	0	272	81	70.2206	29.7794	0	100		590
			2L	214	102	2	318	100	67.2956	32.0755	0.628931	98.0392
	Sum/avg			1599	936	10	2545		63.5426	36.0691	0.388306	98.8906		636.25
	n	4							9	9	9	9		4
	sem								1.76026	1.76191	0.142315	0.428111		122.417
																	63.7908	36.2092	0.391462
																	9	9	9
																	1.76799	1.76799	0.143698

## Sheet: Projection scores
	Mouse1	Mouse2	Mouse3
DEn	+	+	+	dorsal endopiriform nucleus
Acb Sh	+	++	+	accumbens nucleus, shell
CPu	+	+	+	caudate putamen (striatum)
LPO	+	+	+	lateral preoptic area
VP	+	+	+	ventral pallidum
CeA	+++	++	+++	central nucleus of the amygdala
BLA	+	+	+	basolateral amygdala
Xi	++	+	++	xiphoid thalamic nucleus
LH	+++	+++	+++	lateral hypothalamic area
IMD	+	+	+	intermediodorsal thalamic nucleus
CM	+	+	+	central medial thalamic nucleus
PF	++	++	+	parafascicular thalamic nucleus
MM	+	-	+	medial mammillary nucleus
SubB	+	+	+	subbrachial nucleus
PAG	++	+	+	periaqueductal gray
Pa4	++	+	+	paratrochlear nucleus
VLL	+	++	++	ventral nucleus of the lateral lemniscus
DR	+	++	++	dorsal raphe nucleus
InG	+	+	+	intermediate gray layer of the superior colliculus
CnF	+	+	+	cuneiform nucleus
xscp	+	+	+	decussation of the superior cerebellar peduncle
PnO	++	++	++	pontine reticular nucleus
	GCRE;LSL-tdTomato	GCRE1	GCRE2
