# Supplementary material for: GABA neurons in the ventral tegmental area regulate non-rapid eye movement sleep in mice
Source: eLife. 2019 Jun 4;8:e44928. doi: 10.7554/eLife.44928 (PMC6548506; doi:10.7554/eLife.44928)
Supplement: Figure 2—figure supplement 1—source data 1. [file elife-44928-fig2-figsupp1-data1.xlsx]

## Sheet: hM3Dq
	Mice: Gad67-Cre	Inj: AAV-Flex-hM3dq-mCherry
	Cells expressing mCherry (hM3Dq+)					Cells express mCherry only
		Basal (5sec)	CNO 30uM (5sec)				Basal (5sec)	CNO 30uM (5sec)
		20	38	190			35	41	117.143
		47	127	270.213			51	55	107.843
		177	304	171.751			8	10	125
		5	16	320			32	25	78.125
		19	48	252.632			38	47	123.684
		53	92	173.585			70	77	110
		36	89	247.222
		46	304	660.87
	Ave	50.375	127.25	285.784		Ave	39	42.5	110.299
	n	8	8	8		n	6	6	6
	sem	20.3259	43.2858	60.5173		sem	9.23472	10.4528	7.70301
