# Supplementary material for: GABA neurons in the ventral tegmental area regulate non-rapid eye movement sleep in mice
Source: eLife. 2019 Jun 4;8:e44928. doi: 10.7554/eLife.44928 (PMC6548506; doi:10.7554/eLife.44928)
Supplement: Figure 2—figure supplement 2—source data 1. [file elife-44928-fig2-figsupp2-data1.xlsx]

## Sheet: Sheet1
	pre						4 hr post												pre						4 hr post
Saline FFT	mouse 1	mouse 2	mouse 3	mouse 4	mouse 5	mouse 6	mouse 1	mouse 2	mouse 3	mouse 4	mouse 5	mouse 6						CNO	mouse 1	mouse 2	mouse 3	mouse 4	mouse 5	mouse 6	mouse 1	mouse 2	mouse 3	mouse 4	mouse 5	mouse 6
	W	W	W	W	W	W	W	W	W	W	W	W	average						R	R	R	R	R	R	R	R	R	R	R	R	average
Hz	uV^2	uV^2	uV^2	uV^2	uV^2	uV^2	uV^2	uV^2	uV^2	uV^2	uV^2	uV^2	pre	4 hr post			Hz	uV^2	uV^2	uV^2	uV^2	uV^2	uV^2	uV^2	uV^2	uV^2	uV^2	uV^2	uV^2	pre	pre	4 hr post
0	0.000538667	0.000841958	0.00114525	0.00144854	0.00175183	0.00205512	0.00235841	0.0026617	0.002965	0.00326829	0.000115772	0.00187487	0.00129689	0.00220734			0		0.00233895	0.00241186	0.00248476	0.00205512	0.00235841	0.0026617	0.00248751	0.00251676	0.00254601	0.00257526	0.00260451	0.00263376	0.00238514	0.00256064
0.25	0.00200933	0.00218346	0.00235759	0.00253172	0.00270584	0.00287997	0.0030541	0.00322823	0.00340236	0.00357648	0.00375061	0.00392474	0.00244465	0.00348942			0.25		0.00392474	0.00409887	0.00427299	0.00287997	0.0030541	0.00322823	0.0027755	0.00254664	0.00231779	0.00208893	0.00186008	0.00163123	0.00357648	0.00220336
0.5	0.00389844	0.00382078	0.00374312	0.00366546	0.0035878	0.00351014	0.00343248	0.00335482	0.00327716	0.0031995	0.00382184	0.00304418	0.00370429	0.003355			0.5		0.00335529	0.0033243	0.0032933	0.00351014	0.00343248	0.00335482	0.00343229	0.00344769	0.0034631	0.0034785	0.0034939	0.0035093	0.00337839	0.0034708
0.75	0.00536122	0.00538671	0.0054122	0.00543769	0.00546317	0.00548866	0.00551415	0.00553964	0.00556513	0.00559062	0.0056161	0.00564159	0.00542494	0.00557787			0.75		0.00564159	0.00566708	0.00569257	0.00548866	0.00551415	0.00553964	0.00547337	0.00543987	0.00540637	0.00537287	0.00533938	0.00530588	0.00559062	0.00538962
1	0.00649189	0.00652396	0.00655603	0.00658811	0.00662018	0.00665225	0.00668432	0.0067164	0.00674847	0.00678054	0.00681261	0.00684469	0.00657207	0.0067645			1		0.00684469	0.00687676	0.00690883	0.00665225	0.00668432	0.0067164	0.00663301	0.00659086	0.0065487	0.00650655	0.0064644	0.00642225	0.00678054	0.00652763
1.25	0.00813867	0.00816029	0.00818191	0.00820354	0.00822516	0.00824679	0.00826841	0.00829003	0.00831166	0.00833328	0.00835491	0.00837653	0.00819273	0.00832247			1.25		0.00837653	0.00839815	0.00841978	0.00824679	0.00826841	0.00829003	0.00823381	0.00820539	0.00817697	0.00814855	0.00812013	0.00809171	0.00833328	0.00816276
1.5	0.0102337	0.0100506	0.00986762	0.0096846	0.00950158	0.00931856	0.00913554	0.00895252	0.0087695	0.00858648	0.00840346	0.00822044	0.00977611	0.00867799			1.5		0.00822044	0.00803742	0.00785439	0.00931856	0.00913554	0.00895252	0.00942837	0.00966892	0.00990946	0.01015	0.0103905	0.0106311	0.00858648	0.0100297
1.75	0.0110586	0.0114246	0.0117907	0.0121567	0.0125228	0.0128888	0.0132549	0.0136209	0.013987	0.014353	0.014719	0.0150851	0.0119737	0.01417			1.75		0.0120851	0.0114511	0.0098172	0.0128888	0.0132549	0.0136209	0.0126692	0.0121881	0.011707	0.0112259	0.0107448	0.0102637	0.0121863	0.0114664
2	0.0131273	0.0131486	0.0131698	0.0131911	0.0132124	0.0132336	0.0132549	0.0132761	0.0132974	0.0133186	0.0133399	0.0133611	0.0131805	0.013308			2		0.0133611	0.0133824	0.0134037	0.0132336	0.0132549	0.0132761	0.0132209	0.0131929	0.013165	0.0131371	0.0131091	0.0130812	0.0133186	0.013151
2.25	0.0142457	0.0143088	0.0143719	0.014435	0.0144981	0.0145612	0.0146243	0.0146874	0.0147506	0.0148137	0.0148768	0.0149399	0.0144034	0.0147821			2.25		0.0149399	0.015003	0.0150661	0.0145612	0.0146243	0.0146874	0.0145234	0.0144404	0.0143575	0.0142745	0.0141916	0.0141086	0.0148137	0.014316
2.5	0.0176379	0.017767	0.0178961	0.0180252	0.0181543	0.0182834	0.0184125	0.0185416	0.0186707	0.0187998	0.0189289	0.019058	0.0179607	0.0187353			2.5		0.019058	0.0191872	0.0193163	0.0182834	0.0184125	0.0185416	0.018206	0.0180363	0.0178666	0.0176969	0.0175272	0.0173575	0.0187998	0.0177817
2.75	0.0176131	0.0181204	0.0208628	0.0239135	0.0196421	0.0201494	0.0206567	0.0211639	0.0216712	0.0221784	0.0226857	0.023193	0.0200502	0.0219248			2.75		0.0220326	0.0221519	0.0222712	0.0201494	0.0206567	0.0211639	0.0203092	0.0199963	0.0196835	0.0193706	0.0190577	0.0187448	0.0214043	0.019527
3	0.017001	0.0176731	0.0223451	0.0240172	0.0296892	0.0223613	0.0210333	0.0217054	0.0223774	0.0230495	0.0227216	0.0233936	0.0221811	0.0223801			3		0.0218658	0.0215879	0.0213099	0.0223613	0.0210333	0.0217054	0.0215025	0.0214621	0.0214217	0.0213812	0.0213408	0.0213004	0.0216439	0.0214014
3.25	0.0188454	0.0194286	0.0250118	0.0265949	0.0211781	0.0217613	0.0223444	0.0229276	0.0235108	0.0240939	0.0246771	0.0252603	0.0221367	0.0238024			3.25		0.0233158	0.0232657	0.0232155	0.0217613	0.0223444	0.0229276	0.0221892	0.0220132	0.0218372	0.0216612	0.0214853	0.0213093	0.0228051	0.0217492
3.5	0.0188559	0.0200281	0.0262002	0.0283724	0.0235446	0.0247167	0.0258889	0.0270611	0.0282332	0.0254054	0.0245776	0.0317497	0.0236196	0.0271526			3.5		0.0256942	0.025633	0.0255718	0.0247167	0.0258889	0.0270611	0.0264356	0.0266284	0.0268212	0.027014	0.0272067	0.0273995	0.0257609	0.0269176
3.75	0.0214017	0.0224583	0.0285149	0.0305716	0.0256282	0.0266849	0.0277415	0.0287982	0.0298548	0.0269114	0.0259681	0.0330247	0.0258766	0.0287164			3.75		0.0269692	0.0267925	0.0266158	0.0266849	0.0277415	0.0287982	0.0284731	0.0288177	0.0291623	0.0295069	0.0298515	0.0301961	0.027267	0.0293346
4	0.0317388	0.0314234	0.0311079	0.0307925	0.0304771	0.0301616	0.0298462	0.0295308	0.0292154	0.0288999	0.0285845	0.0282691	0.0309502	0.0290576			4		0.0282691	0.0279537	0.0276382	0.0301616	0.0298462	0.0295308	0.0303509	0.0307655	0.03118	0.0315946	0.0320091	0.0324237	0.0288999	0.0313873
4.25	0.0335711	0.0332522	0.0329333	0.0326144	0.0322956	0.0319767	0.0316578	0.0313389	0.03102	0.0307011	0.0353822	0.0300633	0.0327739	0.0316939			4.25		0.0322856	0.0323	0.0323144	0.0319767	0.0316578	0.0313389	0.0312791	0.0310792	0.0308792	0.0306793	0.0304794	0.0302794	0.0319789	0.0307793
4.5	0.0334569	0.0337506	0.0340442	0.0343379	0.0346316	0.0349252	0.0352189	0.0355126	0.0358062	0.0360999	0.0363936	0.0366872	0.0341911	0.0359531			4.5		0.0366872	0.0369809	0.0372746	0.0349252	0.0352189	0.0355126	0.034749	0.0343631	0.0339771	0.0335911	0.0332052	0.0328192	0.0360999	0.0337841
4.75	0.029028	0.02906	0.029092	0.029124	0.029156	0.029188	0.02922	0.029252	0.029284	0.029316	0.029348	0.02938	0.029108	0.0293			4.75		0.02938	0.029412	0.029444	0.029188	0.02922	0.029252	0.0291688	0.0291267	0.0290847	0.0290426	0.0290006	0.0289585	0.029316	0.0290637
5	0.0246786	0.0245655	0.0244524	0.0243393	0.0242262	0.0241131	0.024	0.0238869	0.0237738	0.0236607	0.0235476	0.0234345	0.0243958	0.0237173			5		0.0234345	0.0233214	0.0202084	0.0241131	0.024	0.0238869	0.0201809	0.019033	0.018822	0.0246269	0.0247755	0.0249241	0.0231607	0.0220604
5.25	0.022141	0.0222175	0.022294	0.0223705	0.022447	0.0225235	0.0226	0.0226765	0.022753	0.0228295	0.022906	0.0229825	0.0223323	0.0227912			5.25		0.0229825	0.023059	0.0231355	0.0225235	0.0199884	0.0226765	0.0184776	0.0173771	0.0182765	0.012176	0.0220754	0.0219749	0.0223942	0.0183929
5.5	0.0132994	0.0208329	0.0193663	0.0158997	0.0234331	0.0209666	0.023	0.0242334	0.0254669	0.0167003	0.0179337	0.0191671	0.0189663	0.0210836			5.5		0.0201574	0.0211783	0.0219451	0.0209666	0.02	0.0242334	0.0160354	0.0146296	0.0152237	0.0158179	0.0144121	0.0170062	0.0214135	0.0155208
5.75	0.0139278	0.0213378	0.0197478	0.0186158	0.0243568	0.0209778	0.0232823	0.0242254	0.0251685	0.0161116	0.0170547	0.0179978	0.0198273	0.02064			5.75		0.0199422	0.0197187	0.0194951	0.0209778	0.0232823	0.0242254	0.0126325	0.0105922	0.00955189	0.0105116	0.0114713	0.029431	0.0212736	0.0140317
6	0.0146327	0.0215836	0.0205345	0.0195485	0.0224363	0.0193873	0.0203382	0.0202828	0.0182274	0.020172	0.0201166	0.0200612	0.0196872	0.0198664			6		0.0195056	0.0193836	0.0192615	0.0193873	0.0203382	0.0202828	0.0123807	0.00957712	0.00977355	0.01097	0.0111664	0.0213629	0.0196932	0.0125384
6.25	0.0133516	0.019989	0.0216263	0.0192636	0.019901	0.0195383	0.0186756	0.018113	0.0175503	0.0169876	0.016425	0.0198623	0.018945	0.0179356			6.25		0.0158623	0.0242996	0.014737	0.0195383	0.0186756	0.018113	0.0116559	0.00940399	0.00911521	0.0090014	0.0226482	0.0233963	0.0185376	0.0142035
6.5	0.0204878	0.0204898	0.0204919	0.0204939	0.0204959	0.020498	0.0205	0.020502	0.0205041	0.0205061	0.0205081	0.0205102	0.0204929	0.0205051			6.5		0.0205102	0.0205122	0.0205143	0.020498	0.0205	0.020502	0.0114967	0.00949406	0.0104914	0.0120489	0.020486	0.0204834	0.0205061	0.0140834
6.75	0.0194746	0.0194788	0.0229483	0.0194873	0.0194915	0.0194958	0.0177674	0.016732	0.0156967	0.0246613	0.023626	0.0225907	0.0200627	0.020179			6.75		0.0206462	0.0207776	0.0209089	0.0194958	0.0177674	0.019732	0.0113865	0.00952894	0.0146714	0.0138138	0.0129563	0.0120987	0.019888	0.0124093
7	0.0195083	0.0195403	0.0195722	0.0236042	0.0196361	0.0196681	0.0197	0.0193319	0.0189639	0.0185958	0.0182278	0.0218597	0.0202549	0.0194465			7		0.0178597	0.0214917	0.0221236	0.0196681	0.0197	0.0193319	0.0101822	0.00965452	0.0111268	0.0115991	0.0220714	0.0225437	0.0200292	0.0145296
7.25	0.020388	0.02049	0.020592	0.020694	0.020796	0.020898	0.021	0.021102	0.021204	0.021306	0.021408	0.02151	0.020643	0.021255			7.25		0.02151	0.021612	0.021714	0.020898	0.0212135	0.021102	0.0108368	0.00970274	0.0120569	0.0104346	0.0203006	0.0201665	0.0213416	0.0139164
7.5	0.0224344	0.022362	0.0222896	0.0222172	0.0221448	0.0220724	0.022	0.0219276	0.0218552	0.0217828	0.0217104	0.021638	0.0222534	0.021819			7.5		0.021638	0.0215656	0.0214931	0.0220724	0.0225489	0.0219276	0.0121159	0.010211	0.0122306	0.0124013	0.0224965	0.0225917	0.0218743	0.0153412
7.75	0.0217624	0.0216354	0.0215083	0.0251381	0.0212541	0.0211271	0.021	0.0204972	0.0199945	0.0254917	0.0189889	0.0234862	0.0220709	0.0215764			7.75		0.0206528	0.0204501	0.0232473	0.0241271	0.0216667	0.0204972	0.0148376	0.0108876	0.0120938	0.0109877	0.0210377	0.0210878	0.0217735	0.0151554
8	0.0229563	0.0229397	0.022923	0.0249063	0.0228897	0.022873	0.0233897	0.0234301	0.0234706	0.0235111	0.0235516	0.023592	0.023248	0.0234909			8		0.0234423	0.0234431	0.0234439	0.022873	0.0233897	0.0234301	0.0142578	0.0102352	0.0123213	0.015319	0.0231673	0.0231447	0.023337	0.0164075
8.25	0.023584	0.0235673	0.0235507	0.023534	0.0235173	0.0235007	0.023484	0.0234673	0.0234507	0.023434	0.0234173	0.0234007	0.0235423	0.0234423			8.25		0.0234007	0.023384	0.0233673	0.0235007	0.023484	0.0234673	0.0135107	0.0105326	0.0135545	0.0143576	0.0235983	0.0236202	0.023434	0.016529
8.5	0.0184438	0.0184604	0.0184771	0.0204938	0.0185104	0.0185271	0.0190771	0.0191509	0.0192247	0.0192985	0.0193723	0.0194462	0.0188188	0.0192616			8.5		0.0192964	0.0193306	0.0193647	0.0185271	0.0190771	0.0191509	0.0138919	0.00925486	0.011759	0.0156926	0.0186262	0.0185597	0.0191245	0.0146307
8.75	0.015912	0.015912	0.0159121	0.0159121	0.0159121	0.0159122	0.0159122	0.0159122	0.0159123	0.0159123	0.0159123	0.0159124	0.0159121	0.0159123			8.75		0.0159124	0.0159124	0.0159124	0.0159122	0.0159122	0.0159122	0.0119126	0.0099126	0.0129126	0.0159127	0.0159127	0.0159127	0.0159123	0.013746
9	0.0135013	0.0135097	0.013518	0.0135263	0.0135347	0.013543	0.0135513	0.0135597	0.013568	0.0135763	0.0135847	0.013593	0.0135222	0.0135722			9		0.013593	0.0136013	0.0136097	0.013543	0.0135513	0.0135597	0.011538	0.010527	0.0135161	0.0135051	0.0134942	0.0134832	0.0135763	0.0126773
9.25	0.0112217	0.0112217	0.0112218	0.0112219	0.011222	0.0112221	0.0112222	0.0112222	0.0112223	0.0112224	0.0112225	0.0112226	0.0112219	0.0112224			9.25		0.0112226	0.0112227	0.0112227	0.0112221	0.0112222	0.0112222	0.0102231	0.0102232	0.0112232	0.0112233	0.0112234	0.0112235	0.0112224	0.01089
9.5	0.0114912	0.0114919	0.0114925	0.0114932	0.0114938	0.0114945	0.0114951	0.0114958	0.0114964	0.0114971	0.0114977	0.0114984	0.0114928	0.0114967			9.5		0.0114984	0.011499	0.0114997	0.0114945	0.0114951	0.0114958	0.0104941	0.00949323	0.0114924	0.0114915	0.0114907	0.0114898	0.0114971	0.0109919
9.75	0.0118939	0.0118939	0.0118939	0.0118939	0.0118939	0.0118939	0.0118939	0.0118939	0.0118939	0.0118939	0.0118939	0.0118939	0.0118939	0.0118939			9.75		0.0118939	0.0118939	0.0118939	0.0118939	0.0118939	0.0118939	0.00893889	0.00988939	0.00718939	0.0118939	0.0118939	0.0118939	0.0118939	0.0102832
10	0.0108183	0.0108173	0.0108164	0.0108154	0.0108144	0.0108134	0.0108124	0.0108114	0.0108104	0.0108094	0.0108084	0.0108074	0.0108159	0.0108099			10		0.0108074	0.0108064	0.0125447	0.0108134	0.0108124	0.0108114	0.00781397	0.00808153	0.00730817	0.0108179	0.0108192	0.0108205	0.0110993	0.00927687
10.25	0.010854	0.0108492	0.0108445	0.0108397	0.0108349	0.0108302	0.0108254	0.0108206	0.0108159	0.0108111	0.0108063	0.0108016	0.0108421	0.0108135			10.25		0.0108016	0.0107968	0.010792	0.0108302	0.0113254	0.0108206	0.0075833	0.00783929	0.00640846	0.0108518	0.0108581	0.0108644	0.0108944	0.00906755
10.5	0.0103824	0.0103717	0.010361	0.0103503	0.0103396	0.0103289	0.0103182	0.0103075	0.0102968	0.0102861	0.0102754	0.0102647	0.0103557	0.0102915			10.5		0.0102647	0.010254	0.0102433	0.0103289	0.0103182	0.0112075	0.00713354	0.00734943	0.00663635	0.0103776	0.0103916	0.0104057	0.0104361	0.00871569
10.75	0.00895733	0.00895707	0.0089568	0.00895653	0.00895627	0.008956	0.00895573	0.00895547	0.0089552	0.00895493	0.00895467	0.0089544	0.00895667	0.00895507			10.75		0.0089544	0.00895413	0.00895387	0.008956	0.00895573	0.00895547	0.00689528	0.00709525	0.00895227	0.008952	0.00895173	0.00895147	0.00895493	0.00829967
11	0.00783656	0.00783274	0.00782892	0.00782511	0.00782129	0.00781747	0.00781366	0.00780984	0.00780602	0.00780221	0.00779839	0.00779457	0.00782701	0.00780411			11		0.00779457	0.00779076	0.00778694	0.00781747	0.00781366	0.00780984	0.00648198	0.00678248	0.00782979	0.00783481	0.00783983	0.00784484	0.00780221	0.00743562
11.25	0.00744956	0.00744379	0.00743802	0.00743226	0.00742649	0.00742072	0.00741496	0.00740919	0.00740342	0.00739766	0.00739189	0.00738612	0.00743514	0.00740054			11.25		0.00738612	0.00738036	0.00737459	0.00742072	0.00741496	0.00740919	0.00642418	0.00624318	0.00743934	0.00744692	0.0074545	0.00746208	0.00739766	0.00707837
11.5	0.00759089	0.00757892	0.00756696	0.00755499	0.00754302	0.00753106	0.00751909	0.00750712	0.00749516	0.00748319	0.00747122	0.00745926	0.00756097	0.00748917			11.5		0.00745926	0.00744729	0.00743532	0.00753106	0.00751909	0.00750712	0.00653824	0.00655396	0.00756969	0.00758542	0.00760115	0.00761687	0.00748319	0.00724422
11.75	0.00643589	0.00643384	0.00643179	0.00642974	0.00642769	0.00642564	0.00642359	0.00642154	0.00641949	0.00641744	0.00641539	0.00641334	0.00643076	0.00641846			11.75		0.00641334	0.00641129	0.00640924	0.00642564	0.00642359	0.00642154	0.00642687	0.00642956	0.00643226	0.00643495	0.00643765	0.00644034	0.00641744	0.0064336
12	0.00610267	0.00610393	0.0061052	0.00610647	0.00610773	0.006109	0.00611027	0.00611153	0.0061128	0.00611407	0.00611533	0.0061166	0.00610583	0.00611343			12		0.0061166	0.00611787	0.00611913	0.006109	0.00611027	0.00611153	0.00610824	0.00610658	0.00610491	0.00610325	0.00610158	0.00609992	0.00611407	0.00610408
12.25	0.00539211	0.00538163	0.00537114	0.00536066	0.00535018	0.00533969	0.00532921	0.00531873	0.00530824	0.00529776	0.00528728	0.00527679	0.0053659	0.005303			12.25		0.00527679	0.00526631	0.00525583	0.00533969	0.00532921	0.00531873	0.00534598	0.00535976	0.00537354	0.00538732	0.0054011	0.00541487	0.00529776	0.00538043
12.5	0.00577389	0.00576447	0.00575506	0.00574564	0.00573622	0.00572681	0.00571739	0.00570797	0.00569856	0.00568914	0.00567972	0.00567031	0.00575035	0.00569385			12.5		0.00567031	0.00566089	0.00565147	0.00572681	0.00571739	0.00570797	0.00573246	0.00574483	0.00575721	0.00576958	0.00578196	0.00579434	0.00568914	0.0057634
12.75	0.00578644	0.00577681	0.00576718	0.00575754	0.00574791	0.00573828	0.00572864	0.00571901	0.00570938	0.00569974	0.00569011	0.00568048	0.00576236	0.00570456			12.75		0.00568048	0.00567084	0.00566121	0.00573828	0.00572864	0.00571901	0.00574406	0.00575672	0.00576938	0.00578204	0.0057947	0.00580736	0.00569974	0.00577571
13	0.006178	0.00616797	0.00615793	0.0061479	0.00613787	0.00612783	0.0061178	0.00610777	0.00609773	0.0060877	0.00607767	0.00606763	0.00615292	0.00609272			13		0.00606763	0.0060576	0.00604757	0.00612783	0.0061178	0.00610777	0.00613385	0.00614704	0.00616023	0.00617341	0.0061866	0.00619979	0.0060877	0.00616682
13.25	0.00587089	0.00586359	0.00585629	0.00584899	0.00584169	0.00583439	0.00582709	0.00581979	0.00581249	0.00580519	0.00579789	0.00579059	0.00585264	0.00580884			13.25		0.00579059	0.00578329	0.00577599	0.00583439	0.00582709	0.00581979	0.00583877	0.00584836	0.00585796	0.00586755	0.00587715	0.00588674	0.00580519	0.00586275
13.5	0.00553211	0.00552896	0.00552581	0.00552266	0.00551951	0.00551636	0.00551321	0.00551006	0.00550691	0.00550376	0.00550061	0.00549746	0.00552424	0.00550534			13.5		0.00549746	0.00549431	0.00549116	0.00551636	0.00551321	0.00551006	0.00551825	0.00552239	0.00552653	0.00553067	0.00553481	0.00553895	0.00550376	0.0055286
13.75	0.00469511	0.00468418	0.00467324	0.00466231	0.00465138	0.00464044	0.00462951	0.00461858	0.00460764	0.00459671	0.00458578	0.00457484	0.00466778	0.00460218			13.75		0.00457484	0.00456391	0.00455298	0.00464044	0.00462951	0.00461858	0.004647	0.00466137	0.00467574	0.00469011	0.00470448	0.00471885	0.00459671	0.00468293
14	0.00456544	0.00455729	0.00454914	0.00454099	0.00453284	0.00452469	0.00451654	0.00450839	0.00450024	0.00449209	0.00448394	0.00447579	0.00454507	0.00449617			14		0.00447579	0.00446764	0.00445949	0.00452469	0.00451654	0.00450839	0.00452958	0.0045403	0.00455101	0.00456172	0.00457243	0.00458314	0.00449209	0.00455636
14.25	0.00436878	0.00436013	0.00435148	0.00434283	0.00433418	0.00432553	0.00431688	0.00430823	0.00429958	0.00429093	0.00428228	0.00427363	0.00434715	0.00429525			14.25		0.00427363	0.00426498	0.00425633	0.00432553	0.00431688	0.00430823	0.00433072	0.00434209	0.00435345	0.00436482	0.00437619	0.00438756	0.00429093	0.00435914
14.5	0.00376233	0.00375632	0.0037503	0.00374428	0.00373827	0.00373225	0.00372623	0.00372022	0.0037142	0.00370818	0.00370217	0.00369615	0.00374729	0.00371119			14.5		0.00369615	0.00369013	0.00368412	0.00373225	0.00372623	0.00372022	0.00373586	0.00374377	0.00375168	0.00375958	0.00376749	0.0037754	0.00370818	0.00375563
14.75	0.00383844	0.00383601	0.00383358	0.00383114	0.00382871	0.00382628	0.00382384	0.00382141	0.00381898	0.00381654	0.00381411	0.00381168	0.00383236	0.00381776			14.75		0.00381168	0.00380924	0.00380681	0.00382628	0.00382384	0.00382141	0.00382774	0.00383094	0.00383413	0.00383733	0.00384053	0.00384373	0.00381654	0.00383573
15	0.00387978	0.00386948	0.00385918	0.00384888	0.00383858	0.00382828	0.00381798	0.00380768	0.00379738	0.00378708	0.00377678	0.00376648	0.00385403	0.00379223			15		0.00376648	0.00375618	0.00374588	0.00382828	0.00381798	0.00380768	0.00383446	0.00384799	0.00386153	0.00387507	0.00388861	0.00390214	0.00378708	0.0038683
15.25	0.00364033	0.00363928	0.00363823	0.00363718	0.00363613	0.00363508	0.00363403	0.00363298	0.00363193	0.00363088	0.00362983	0.00362878	0.00363771	0.00363141			15.25		0.00362878	0.00362773	0.00362668	0.00363508	0.00363403	0.00363298	0.00363571	0.00363709	0.00363847	0.00363985	0.00364123	0.00364261	0.00363088	0.00363916
15.5	0.00315111	0.00314678	0.00314244	0.00313811	0.00313378	0.00312944	0.00312511	0.00312078	0.00311644	0.00311211	0.00310778	0.00310344	0.00314028	0.00311428			15.5		0.00310344	0.00309911	0.00309478	0.00312944	0.00312511	0.00312078	0.00313204	0.00313774	0.00314343	0.00314913	0.00315483	0.00316052	0.00311211	0.00314628
15.75	0.00282278	0.00282436	0.00282594	0.00282753	0.00282911	0.00283069	0.00283228	0.00283386	0.00283544	0.00283703	0.00283861	0.00284019	0.00282674	0.00283624			15.75		0.00284019	0.00284178	0.00284336	0.00283069	0.00283228	0.00283386	0.00282974	0.00282766	0.00282558	0.0028235	0.00282142	0.00281934	0.00283703	0.00282454
16	0.00274256	0.00273951	0.00273646	0.00273341	0.00273036	0.00272731	0.00272426	0.00272121	0.00271816	0.00271511	0.00271206	0.00270901	0.00273493	0.00271663			16		0.00270901	0.00270596	0.00270291	0.00272731	0.00272426	0.00272121	0.00272914	0.00273314	0.00273715	0.00274116	0.00274517	0.00274918	0.00271511	0.00273916
16.25	0.002811	0.00281268	0.00281437	0.00281605	0.00281773	0.00281942	0.0028211	0.00282278	0.00282447	0.00282615	0.00282783	0.00282952	0.00281521	0.00282531			16.25		0.00282952	0.0028312	0.00283288	0.00281942	0.0028211	0.00282278	0.00281841	0.00281619	0.00281398	0.00281177	0.00280956	0.00280734	0.00282615	0.00281288
16.5	0.00262422	0.00262226	0.00262029	0.00261832	0.00261636	0.00261439	0.00261242	0.00261046	0.00260849	0.00260652	0.00260456	0.00260259	0.00261931	0.00260751			16.5		0.00260259	0.00260062	0.00259866	0.00261439	0.00261242	0.00261046	0.00261557	0.00261815	0.00262074	0.00262332	0.00262591	0.00262849	0.00260652	0.00262203
16.75	0.00234244	0.00233941	0.00233638	0.00233334	0.00233031	0.00232728	0.00232424	0.00232121	0.00231818	0.00231514	0.00231211	0.00230908	0.00233486	0.00231666			16.75		0.00230908	0.00230604	0.00230301	0.00232728	0.00232424	0.00232121	0.0023291	0.00233308	0.00233707	0.00234106	0.00234504	0.00234903	0.00231514	0.00233906
17	0.00199589	0.00198484	0.00197379	0.00196274	0.00195169	0.00194064	0.00192959	0.00191854	0.00190749	0.00189644	0.00188539	0.00187434	0.00196826	0.00190196			17		0.00187434	0.00186329	0.00185224	0.00194064	0.00192959	0.00191854	0.00194727	0.00196179	0.00197631	0.00199084	0.00200536	0.00201988	0.00189644	0.00198358
17.25	0.00173611	0.00173236	0.00172861	0.00172486	0.00172111	0.00171736	0.00171361	0.00170986	0.00170611	0.00170236	0.00169861	0.00169486	0.00172674	0.00170424			17.25		0.00169486	0.00169111	0.00168736	0.00171736	0.00171361	0.00170986	0.00171961	0.00172454	0.00172947	0.0017344	0.00173933	0.00174425	0.00170236	0.00173193
17.5	0.00167144	0.00166239	0.00165334	0.00164429	0.00163524	0.00162619	0.00161714	0.00160809	0.00159904	0.00158999	0.00158094	0.00157189	0.00164882	0.00159452			17.5		0.00157189	0.00156284	0.00155379	0.00162619	0.00161714	0.00160809	0.00163162	0.00164352	0.00165541	0.00166731	0.0016792	0.0016911	0.00158999	0.00166136
17.75	0.00159611	0.00158503	0.00157394	0.00156286	0.00155178	0.00154069	0.00152961	0.00151853	0.00150744	0.00149636	0.00148528	0.00147419	0.0015684	0.0015019			17.75		0.00147419	0.00146311	0.00145203	0.00154069	0.00152961	0.00151853	0.00154734	0.00156191	0.00157648	0.00159104	0.00160561	0.00162018	0.00149636	0.00158376
18	0.00142989	0.00142874	0.00142759	0.00142644	0.00142529	0.00142414	0.00142299	0.00142184	0.00142069	0.00141954	0.00141839	0.00141724	0.00142701	0.00142011			18		0.00141724	0.00141609	0.00141494	0.00142414	0.00142299	0.00142184	0.00142483	0.00142634	0.00142785	0.00142936	0.00143087	0.00143239	0.00141954	0.00142861
18.25	0.00130844	0.00131051	0.00131258	0.00131464	0.00131671	0.00131878	0.00132084	0.00132291	0.00132498	0.00132704	0.00132911	0.00133118	0.00131361	0.00132601			18.25		0.00133118	0.00133324	0.00133531	0.00131878	0.00132084	0.00132291	0.00131754	0.00131482	0.00131211	0.00130939	0.00130667	0.00130396	0.00132704	0.00131075
18.5	0.00123478	0.00123123	0.00122768	0.00122413	0.00122058	0.00121703	0.00121348	0.00120993	0.00120638	0.00120283	0.00119928	0.00119573	0.0012259	0.0012046			18.5		0.00119573	0.00119218	0.00118863	0.00121703	0.00121348	0.00120993	0.00121916	0.00122382	0.00122849	0.00123315	0.00123782	0.00124249	0.00120283	0.00123082
18.75	0.001007	0.00100762	0.00100823	0.00100885	0.00100947	0.00101008	0.0010107	0.00101132	0.00101193	0.00101255	0.00101317	0.00101378	0.00100854	0.00101224			18.75		0.00101378	0.0010144	0.00101502	0.00101008	0.0010107	0.00101132	0.00101748	0.0010181	0.00101872	0.00101933	0.00101995	0.00102057	0.00101255	0.00101903
19	0.000824778	0.000822728	0.000820678	0.000818628	0.000816578	0.000814528	0.000812478	0.000810428	0.000808378	0.000806328	0.000804278	0.000802228	0.000819653	0.000807353			19		0.000802228	0.000800178	0.000798128	0.000814528	0.000812478	0.000810428	0.000815758	0.000818452	0.000821146	0.000823841	0.000826535	0.000829229	0.000806328	0.000822493
19.25	0.000702	0.000703367	0.000704733	0.0007061	0.000707467	0.000708833	0.0007102	0.000711567	0.000712933	0.0007143	0.000715667	0.000717033	0.000705417	0.000713617			19.25		0.000717033	0.0007184	0.000719767	0.000708833	0.0007102	0.000711567	0.000708013	0.000706217	0.000704421	0.000702625	0.000700829	0.000699032	0.0007143	0.000703523
19.5	0.000581111	0.000570611	0.000560111	0.000549611	0.000539111	0.000528611	0.000518111	0.000507611	0.000497111	0.000486611	0.000476111	0.000465611	0.000554861	0.000491861			19.5		0.000465611	0.000455111	0.000444611	0.000528611	0.000518111	0.000507611	0.000534911	0.000548711	0.000562511	0.000576311	0.000590111	0.000603911	0.000486611	0.000569411
19.75	0.000502889	0.000504951	0.000507012	0.000509074	0.000511136	0.000513197	0.000515259	0.000517321	0.000519382	0.000521444	0.000523506	0.000525567	0.000508043	0.000520413			19.75		0.000525567	0.000527629	0.000529691	0.000513197	0.000515259	0.000517321	0.00051196	0.000509251	0.000506541	0.000503831	0.000501122	0.000498412	0.000521444	0.000505186
20	0.000446667	0.0004415	0.000436333	0.000431167	0.000426	0.000420833	0.000415667	0.0004105	0.000405333	0.000400167	0.000395	0.000389833	0.00043375	0.00040275			20		0.000389833	0.000384667	0.0003795	0.000420833	0.000415667	0.0004105	0.000423933	0.000430724	0.000437514	0.000444305	0.000451095	0.000457886	0.000400167	0.00044091
	pre						4 hr post												pre						4 hr post
saline	mouse 1	mouse 2	mouse 3	mouse 4	mouse 5	mouse 6	mouse 1	mouse 2	mouse 3	mouse 4	mouse 5	mouse 6						CNO FFT	mouse 1	mouse 2	mouse 3	mouse 4	mouse 5	mouse 6	mouse 1	mouse 2	mouse 3	mouse 4	mouse 5	mouse 6
	W	W	W	W	W	W	W	W	W	W	W	W	average						R	R	R	R	R	R	R	R	R	R	R	R	average
Hz	uV^2	uV^2	uV^2	uV^2	uV^2	uV^2	uV^2	uV^2	uV^2	uV^2	uV^2	uV^2	pre	4 hr post			Hz	uV^2	uV^2	uV^2	uV^2	uV^2	uV^2	uV^2	uV^2	uV^2	uV^2	uV^2	uV^2	uV^2	Pre	4 hr post
0	0.00037579	0.000288948	0.000815	0.000745322	0.000964926	0.000472	0.000854261	0.000923956	0.00099365	0.00106334	None	0.000307008	0.000610331	0.000828444			0		0.0007735	0.000895	0.001312	0.000488	0.000659	0.000472	0.0007493	0.003089	0.000624	0.001326	None	0.000635	0.000766583	0.00128466
0.25	0.00170416	0.00156529	0.001942	0.00245512	0.00257404	0.002159	0.00264796	0.00281406	0.00298016	0.00314627	None	0.00138303	0.0020666	0.0025943			0.25		0.0025595	0.00289	0.002429	0.001785	0.002152	0.002159	0.002173	0.002513	0.002331	0.001957	None	0.002541	0.00232908	0.002303
0.5	0.00299756	0.00275022	0.002829	0.00412352	0.00403924	0.003034	0.00382997	0.00398265	0.00413533	0.00428801	None	0.00215645	0.00329559	0.00367848			0.5		0.00407033	0.005592	0.003101	0.005098	0.003768	0.003034	0.004737	0.004656	0.005299	0.002732	None	0.00234	0.00411056	0.0039528
0.75	0.00447891	0.00436414	0.005398	0.00505132	0.00551086	0.0037	0.00467043	0.00464754	0.00462465	0.00460176	None	0.00454195	0.00475054	0.00461727			0.75		0.00476717	0.005136	0.004297	0.007596	0.004476	0.0037	0.003482	0.0036343	0.002806	0.0021988	None	0.003697	0.00499536	0.00316362
1	0.00474358	0.00428748	0.008884	0.00712033	0.00919053	0.004649	0.00772641	0.00808277	0.00843913	0.00879549	None	0.00521581	0.00647915	0.00765192			1		0.00709433	0.007571	0.007748	0.007209	0.006505	0.004649	0.002871	0.00271	0.0030394	0.0022433	None	0.003727	0.00679606	0.00291814
1.25	0.00542703	0.00511475	0.007814	0.00701325	0.00820674	0.005598	0.00746197	0.00772854	0.00799512	0.00826169	None	0.00554679	0.00652896	0.00739882			1.25		0.00701767	0.007634	0.0071897	0.0072013	0.006353	0.005598	0.002979	0.002325	0.0030176	0.003172	None	0.0030134	0.00683228	0.0029014
1.5	0.00703925	0.00694667	0.006306	0.00768132	0.0073147	0.007315	0.00748631	0.00759654	0.00770677	0.00781701	None	0.00641979	0.00710049	0.00740528			1.5		0.00720808	0.0080568	0.0079469	0.00714158	0.0070669	0.007315	0.00286689	0.0026528	0.0029702	0.003223	None	0.00299	0.00745588	0.00294058
1.75	0.00848475	0.00782144	0.01164	0.0108813	0.0124589	0.008186	0.0110781	0.0114112	0.0117444	0.0120775	None	0.00786871	0.00991208	0.010836			1.75		0.011494	0.01156	0.01464	0.013085	0.009853	0.008186	0.0027891	0.002988	0.00281118	0.003031	None	0.0031123	0.0114697	0.00294632
2	0.00905291	0.00795271	0.013008	0.0146513	0.0166289	0.010002	0.0151244	0.0160506	0.0169768	0.017903	None	0.00745006	0.0118826	0.0147009			2		0.0149073	0.015545	0.017995	0.0130356	0.012538	0.010002	0.006561	0.0022891	0.00511578	0.004872	None	0.005074	0.0140038	0.00478238
2.25	0.00915081	0.00833192	0.00873	0.0144653	0.0142549	0.010118	0.0136759	0.0144856	0.0152953	0.016105	None	0.00642841	0.0108418	0.013198			2.25		0.0137962	0.01407	0.0147066	0.0131632	0.011161	0.010118	0.005127	0.0037429	0.00510249	0.0050784	None	0.005458	0.0128358	0.00490176
2.5	0.0188415	0.0197219	0.019879	0.0177162	0.0182349	0.02117	0.0197624	0.0199058	0.0200492	0.0201926	None	0.0220342	0.0192606	0.0203889			2.5		0.017594	0.010917	0.01123	0.014095	0.014273	0.02117	0.010621	0.00309521	0.0071968	0.009436	None	0.007845	0.0148798	0.0076388
2.75	0.0144938	0.0196443	0.019817	0.0155653	0.0182269	0.024089	0.0190134	0.0178441	0.0166748	0.0155055	None	0.0329387	0.0186394	0.0203953			2.75		0.0155235	0.010614	0.011633	0.014269	0.018202	0.024089	0.011598	0.0120172	0.0092192	0.0117	None	0.012891	0.0157218	0.0114851
3	0.0189198	0.0195102	0.020656	0.0184844	0.0193524	0.017554	0.0181321	0.0178614	0.0175907	0.01732	None	0.0215337	0.0190795	0.0184876			3		0.0175565	0.011761	0.015779	0.016525	0.018404	0.017554	0.016773	0.012924	0.0125435	0.008045	None	0.019552	0.0162633	0.0139675
3.25	0.0243046	0.0247721	0.015727	0.0202251	0.0159363	0.018654	0.0149103	0.0134743	0.0120382	0.0106022	None	0.0218507	0.0199365	0.0145751			3.25		0.020604	0.017096	0.023803	0.028969	0.0240784	0.018654	0.018329	0.019256	0.014301	0.01262	None	0.017626	0.0222007	0.0164264
3.5	0.0261818	0.0271028	0.013627	0.0218476	0.0155702	0.026772	0.0195076	0.0188383	0.018169	0.0174997	None	0.0233217	0.0218502	0.0194673			3.5		0.0217798	0.014156	0.028351	0.022703	0.018463	0.026772	0.0203956	0.021424	0.026133	0.016206	None	0.019731	0.0220375	0.0207779
3.75	0.0295758	0.030433	0.016016	0.0245565	0.0177766	0.024195	0.0181256	0.0165161	0.0149066	0.0132971	None	0.0260619	0.0237588	0.0177814			3.75		0.0241722	0.016742	0.032685	0.028373	0.0281423	0.024195	0.020805	0.0216884	0.0212384	0.024068	None	0.023899	0.0257182	0.0223398
4	0.041302	0.0426848	0.063289	0.0337456	0.0557391	0.043722	0.0543719	0.0479967	0.0522744	0.0486552	None	0.0564792	0.0467471	0.0519555			4		0.034012	0.033119	0.0323665	0.0351009	0.0321566	0.043722	0.0278991	0.0261099	0.0251064	0.025143	None	0.02557	0.0350795	0.0259657
4.25	0.0587649	0.0593095	0.071384	0.0577192	0.0520815	0.056039	0.0631326	0.0548204	0.0650827	0.0751961	None	0.0661843	0.0592163	0.0648832			4.25		0.0515723	0.052023	0.0691109	0.0527538	0.056385	0.056039	0.035402	0.036776	0.037061	0.0333304	None	0.037729	0.056314	0.0360597
4.5	0.0836723	0.0821145	0.086637	0.0871059	0.0885883	0.083218	0.0869845	0.0874879	0.0879913	0.0884947	None	0.0802048	0.0852227	0.0862326			4.5		0.0924217	0.089505	0.095508	0.097406	0.086037	0.083218	0.0558488	0.066125	0.059538	0.066606	None	0.052713	0.0906826	0.0601662
4.75	0.0888452	0.0884094	0.081138	0.0950903	0.0823676	0.084089	0.0710001	0.0682474	0.0654946	0.0627419	None	0.0794494	0.0866566	0.0693867			4.75		0.0908408	0.0868763	0.0938434	0.0972932	0.091895	0.084089	0.0927538	0.088385	0.090338	0.087285	None	0.0910322	0.0908063	0.0899588
5	0.0699573	0.0714895	0.058201	0.095793	0.0889148	0.070407	0.0660721	0.0652468	0.0644215	0.0635963	None	0.0693494	0.0757938	0.0657372			5		0.0607562	0.058736	0.062768	0.066388	0.05932	0.070407	0.0917406	0.086037	0.0937354	0.080715	None	0.090091	0.0630625	0.0884638
5.25	0.0358333	0.0289682	0.040736	0.0647489	0.0429506	0.058539	0.0616117	0.0620115	0.0624113	0.062811	None	0.0613893	0.045296	0.062047			5.25		0.0562085	0.050796	0.0614105	0.046632	0.059252	0.058539	0.062932	0.051895	0.069311	0.065632	None	0.027735	0.055473	0.055501
5.5	0.0237568	0.026716	0.044317	0.0394948	0.0263241	0.038766	0.0724515	0.0771214	0.0817914	0.0864613	None	0.0470938	0.0332291	0.0729839			5.5		0.0434553	0.04641	0.035669	0.041889	0.042215	0.038766	0.046388	0.04932	0.0428317	0.051321	None	0.020795	0.0414007	0.0421311
5.75	0.0214852	0.0210332	0.023358	0.0338316	0.019768	0.031674	0.0722872	0.0776478	0.0830084	0.088369	None	0.0445757	0.0251917	0.0731776			5.75		0.0316767	0.039345	0.029886	0.036744	0.03179	0.031674	0.037822	0.048233	0.034512	0.027811	None	0.019882	0.0335193	0.033652
6	0.0202877	0.0197086	0.019917	0.0293375	0.0192748	0.021162	0.0714437	0.0782011	0.0849584	0.0917158	None	0.0365111	0.0216146	0.072566			6		0.0226132	0.026534	0.021458	0.024367	0.021227	0.021162	0.024003	0.039809	0.029798	0.023766	None	0.021397	0.0228935	0.0277546
6.25	0.0208412	0.0206461	0.014472	0.0239037	0.0364099	0.022195	0.051917	0.0560581	0.0601993	0.0643404	None	0.0309795	0.023078	0.0526989			6.25		0.0213503	0.023693	0.021766	0.021068	0.020242	0.022195	0.021231	0.029616	0.0280678	0.023258	None	0.021035	0.0217191	0.0246416
6.5	0.0221672	0.0224263	0.013089	0.0341493	0.013161	0.024108	0.0348899	0.0366418	0.0383937	0.0401456	None	0.0270234	0.0215168	0.0354189			6.5		0.0211535	0.020515	0.022132	0.018162	0.019937	0.024108	0.019387	0.024194	0.0215039	0.022478	None	0.019183	0.0210012	0.0213492
6.75	0.0197822	0.0197564	0.016265	0.0284173	0.0216587	0.020768	0.0287201	0.0299426	0.0311651	0.0323876	None	0.0226491	0.0211079	0.0289729			6.75		0.0202408	0.021607	0.018382	0.017758	0.020635	0.020768	0.01954	0.0229866	0.017288	0.022732	None	0.022713	0.0198985	0.0210519
7	0.0187308	0.0186509	0.014423	0.0229605	0.0218066	0.01807	0.012777	0.0119685	0.0111599	0.0103514	None	0.016526	0.019107	0.0125566			7		0.0190835	0.020536	0.017552	0.01823	0.021068	0.01807	0.020179	0.019675	0.017857	0.021611	None	0.020919	0.0190899	0.0200482
7.25	0.0177384	0.0175653	0.01776	0.0151308	0.00274074	0.016959	0.0151726	0.00350072	0.0182887	0.0015703	None	0.0129248	0.014649	0.0102914			7.25		0.0188742	0.01973	0.017067	0.017828	0.020648	0.016959	0.021492	0.01943	0.016738	0.020402	None	0.01812	0.0185177	0.0192364
7.5	0.0157436	0.0157544	0.017628	0.0180931	0.0190353	0.015521	0.0179487	0.0182543	0.0185598	0.0188654	None	0.0150881	0.0169626	0.0177432			7.5		0.018279	0.0201	0.017496	0.017179	0.019095	0.015521	0.019712	0.019835	0.026108	0.021066	None	0.01918	0.017945	0.0211802
7.75	0.0146138	0.0178837	0.014918	0.0147761	0.0149282	0.01434	0.0147389	0.0147852	0.0148316	0.014878	None	0.0124955	0.0152433	0.0143458			7.75		0.0179705	0.021437	0.017083	0.017849	0.018715	0.01434	0.019529	0.018334	0.015735	0.021523	None	0.020218	0.0178991	0.0190678
8	0.0155932	0.0151988	0.012091	0.0125508	0.0112092	0.015115	0.0220242	0.0128608	0.0236974	0.024534	None	0.0167908	0.0136263	0.0199815			8		0.0170835	0.019382	0.017067	0.017716	0.017845	0.015115	0.019356	0.019019	0.01516	0.019568	None	0.016068	0.0173681	0.0178342
8.25	0.0162062	0.0161412	0.012138	0.0147603	0.0172613	0.015118	0.0233275	0.0154448	0.0176144	0.019784	None	0.0223379	0.0152708	0.0197017			8.25		0.0162277	0.016873	0.016175	0.016865	0.017734	0.015118	0.018042	0.017714	0.014679	0.017617	None	0.0167	0.0164988	0.0169504
8.5	0.0150709	0.0150111	0.021018	0.0196471	0.0151207	0.014763	0.028847	0.0206304	0.0324138	0.0141972	None	0.0198622	0.0167718	0.0231901			8.5		0.0150817	0.015903	0.015412	0.015005	0.015873	0.014763	0.018123	0.01717	0.014589	0.017761	None	0.018167	0.0153396	0.017162
8.75	0.0146774	0.0144867	0.017591	0.0184986	0.0199554	0.014477	0.0182455	0.0187116	0.0191776	0.0196437	None	0.0154122	0.0166144	0.0182381			8.75		0.0152203	0.016797	0.014941	0.016482	0.015297	0.014477	0.017925	0.016791	0.01297	0.018912	None	0.014707	0.0155357	0.016261
9	0.0141369	0.0139265	0.009221	0.00751228	0.00505436	0.013774	0.00759022	0.00672909	0.00586796	0.00500683	None	0.0112523	0.0106042	0.00728929			9		0.0147063	0.016634	0.01414	0.016196	0.015049	0.013774	0.01607	0.015465	0.012829	0.018143	None	0.014027	0.0150832	0.0153068
9.25	0.0140506	0.0140083	0.007344	0.0050944	0.00174112	0.012716	0.00458667	0.00328027	0.00197387	0.000667469	None	0.0108715	0.00915906	0.00427596			9.25		0.0140122	0.014547	0.013504	0.014924	0.015741	0.012716	0.015172	0.015275	0.012752	0.017003	None	0.01531	0.0142407	0.0151024
9.5	0.0139956	0.0141366	0.009507	0.00805782	0.00581353	0.01267	0.00739212	0.00644793	0.00550374	0.00455956	None	0.0123913	0.0106968	0.00725893			9.5		0.013245	0.012436	0.013495	0.013171	0.015148	0.01267	0.01399	0.01357	0.011519	0.01742	None	0.014815	0.0133608	0.0142628
9.75	0.0150358	0.015305	0.00867	0.00663779	0.00345488	0.013028	0.00559307	0.00423245	0.00287182	0.0015112	None	0.0129744	0.0103553	0.00543658			9.75		0.0136073	0.012178	0.013781	0.014211	0.016141	0.013028	0.014563	0.012889	0.011837	0.016341	None	0.011952	0.0138244	0.0135164
10	0.0143377	0.0144398	0.00652	0.00394814	3.93021e-05	0.013542	0.00382932	0.00240785	0.000986375	-0.000435098	None	0.0110997	0.00880448	0.00357763			10		0.0135958	0.013022	0.014597	0.014017	0.014496	0.013542	0.014285	0.012841	0.012343	0.015093	None	0.010992	0.0138783	0.0131108
10.25	0.012504	0.0123621	0.010486	0.00976604	0.00875704	0.011391	0.00916769	0.00867912	0.00819055	0.00770198	None	0.0111481	0.0108777	0.00897749			10.25		0.0128053	0.013779	0.013402	0.012795	0.014683	0.011391	0.014011	0.012215	0.011691	0.014258	None	0.011684	0.0131426	0.0127718
10.5	0.0106221	0.0103507	0.010702	0.0106382	0.0106781	0.010222	0.0104273	0.0103964	0.0103655	0.0103346	None	0.00981955	0.0105355	0.0102687			10.5		0.0117122	0.012253	0.012835	0.012284	0.011754	0.010222	0.013683	0.011769	0.010884	0.013776	None	0.011443	0.0118434	0.012311
10.75	0.0116798	0.0115794	0.008563	0.00749057	0.00593216	0.012059	0.00793884	0.00747832	0.0070178	0.00655728	None	0.0099526	0.00955066	0.00778897			10.75		0.0119402	0.01308	0.011342	0.013319	0.011051	0.012059	0.013643	0.011341	0.011254	0.014247	None	0.012218	0.0121319	0.0125406
11	0.0111827	0.0110106	0.007955	0.00682173	0.00520788	0.011125	0.00700083	0.00646283	0.00592483	0.00538683	None	0.00918359	0.00888382	0.00679178			11		0.0117402	0.013412	0.011077	0.012401	0.011988	0.011125	0.013643	0.011082	0.01098	0.013692	None	0.012495	0.0119572	0.0123784
11.25	0.0105644	0.0103624	0.006903	0.00561519	0.00378448	0.0102	0.00562054	0.00496786	0.00431517	0.00366249	None	0.00827581	0.00790492	0.00536837			11.25		0.0112033	0.013143	0.010243	0.012267	0.011784	0.0102	0.013013	0.011063	0.010571	0.012926	None	0.012387	0.0114734	0.011992
11.5	0.0102852	0.0102208	0.006502	0.00521944	0.00332783	0.010088	0.00531245	0.0046568	0.00400115	0.0033455	None	0.00836644	0.00760722	0.00513647			11.5		0.010275	0.011276	0.010268	0.010928	0.010616	0.010088	0.011692	0.010208	0.009528	0.012949	None	0.012892	0.0105752	0.0114538
11.75	0.0104154	0.0104303	0.010942	0.0111225	0.0113858	0.009627	0.0105643	0.0105388	0.0105132	0.0104876	None	0.0107007	0.0106538	0.0105609			11.75		0.0101697	0.010287	0.010389	0.010185	0.011433	0.009627	0.010438	0.010309	0.01062	0.012764	None	0.010563	0.0103484	0.0109388
12	0.0108169	0.0109776	0.008748	0.00811197	0.00707755	0.010427	0.00793128	0.00752312	0.00711496	0.0067068	None	0.0103734	0.00935983	0.00792992			12		0.00996217	0.009866	0.009416	0.010175	0.010714	0.010427	0.010171	0.010092	0.010035	0.012022	None	0.009809	0.0100934	0.0104258
12.25	0.0090599	0.00896922	0.004116	0.00243781	-3.41365e-05	0.008788	0.00255136	0.00169285	0.000834344	-2.41634e-05	None	0.00653241	0.00555613	0.00231736			12.25		0.0093085	0.010243	0.008851	0.009921	0.009696	0.008788	0.010238	0.009543	0.009045	0.012102	None	0.010015	0.00946792	0.0101886
12.5	0.0077345	0.00738038	0.01024	0.0109571	0.0122099	0.007224	0.0105563	0.0109178	0.0112793	0.0116408	None	0.00777879	0.00929098	0.0104346			12.5		0.0090925	0.010893	0.009008	0.010309	0.009442	0.007224	0.010558	0.009095	0.00817	0.01234	None	0.009748	0.00932808	0.0099822
12.75	0.0078711	0.00752069	0.008576	0.00869416	0.00904661	0.007577	0.0085368	0.00862896	0.00872111	0.00881327	None	0.00710843	0.00821426	0.00836171			12.75		0.00928467	0.011564	0.008562	0.009786	0.009914	0.007577	0.009579	0.009064	0.008574	0.011775	None	0.008952	0.00944794	0.0095888
13	0.00783483	0.00756887	0.005535	0.00467974	0.00352983	0.007826	0.00486073	0.00448883	0.00411692	0.00374502	None	0.00596742	0.00616238	0.00463578			13		0.00894467	0.010422	0.008862	0.008996	0.009139	0.007826	0.009167	0.008315	0.008832	0.011783	None	0.008485	0.00903161	0.0093164
13.25	0.00838134	0.00837492	0.005502	0.00454008	0.00310041	0.008276	0.00463125	0.00413661	0.00364198	0.00314735	None	0.00705271	0.00636246	0.00452198			13.25		0.00817233	0.009152	0.007868	0.008199	0.008794	0.008276	0.009025	0.007921	0.008293	0.010148	None	0.008905	0.00841022	0.0088584
13.5	0.0084299	0.00854098	0.00518	0.00413372	0.00250877	0.0085	0.00433632	0.00379939	0.00326247	0.00272554	None	0.00729599	0.00621556	0.00428394			13.5		0.0076425	0.008331	0.007329	0.007706	0.008072	0.0085	0.008771	0.007066	0.006685	0.010056	None	0.008127	0.00793008	0.008141
13.75	0.00738673	0.00737935	0.002731	0.00117663	-0.00115124	0.006434	0.000801768	-0.00010994	-0.00102165	-0.00193336	None	0.00524768	0.00399275	0.0005969			13.75		0.00708567	0.007507	0.007334	0.007811	0.008348	0.006434	0.008083	0.007069	0.006309	0.009977	None	0.007884	0.00741994	0.0078644
14	0.00641815	0.00620145	0.003275	0.00215505	0.000583477	0.005967	0.00207706	0.00149907	0.000921081	0.000343092	None	0.00431966	0.00410002	0.00183199			14		0.00724767	0.00857	0.007079	0.00744	0.008056	0.005967	0.008338	0.007257	0.006654	0.009675	None	0.008265	0.00739328	0.0080378
14.25	0.0061595	0.00600029	0.004258	0.0035711	0.00262035	0.00575	0.00343911	0.00307128	0.00270344	0.00233561	None	0.00480308	0.00472654	0.0032705			14.25		0.00683167	0.007842	0.006345	0.006877	0.00761	0.00575	0.008044	0.007862	0.006207	0.008695	None	0.007623	0.00687594	0.0076862
14.5	0.0073504	0.0074011	0.002274	0.000598767	-0.00193943	0.007657	0.00107392	0.000269241	-0.00053544	-0.00134012	None	0.00519965	0.00389031	0.000933452			14.5		0.0068185	0.008013	0.006386	0.006785	0.007074	0.007657	0.007424	0.007187	0.005287	0.008588	None	0.006996	0.00712225	0.0070964
14.75	0.00620045	0.00608086	0.004187	0.00347599	0.00246927	0.006892	0.00407546	0.00384437	0.00361328	0.0033822	None	0.00491562	0.00488426	0.00396618			14.75		0.0063955	0.008613	0.006004	0.006203	0.006324	0.006892	0.007134	0.006318	0.004993	0.007488	None	0.006162	0.00673858	0.006419
15	0.00627737	0.00627343	0.003002	0.00190889	0.000271205	0.006366	0.00215082	0.00161777	0.00108472	0.000551678	None	0.00477637	0.00401648	0.00203627			15		0.00603883	0.00697	0.00619	0.005646	0.00656	0.006366	0.006146	0.006093	0.004749	0.007026	None	0.005623	0.00629514	0.0059274
15.25	0.0061903	0.00631132	0.003793	0.00303424	0.0018356	0.006294	0.00320967	0.00281917	0.00242867	0.00203818	None	0.0054747	0.00457641	0.00319408			15.25		0.005492	0.005437	0.005727	0.005254	0.00567	0.006294	0.005491	0.005479	0.004903	0.006815	None	0.006214	0.00564567	0.0057804
15.5	0.00526221	0.00528505	0.003908	0.00346421	0.00278711	0.005604	0.00376223	0.00358427	0.0034063	0.00322834	None	0.00471726	0.0043851	0.00373968			15.5		0.0049525	0.005663	0.004945	0.00495	0.004842	0.005604	0.005235	0.004825	0.004495	0.006546	None	0.005634	0.00515942	0.005347
15.75	0.00441673	0.00431593	0.003801	0.00356216	0.00325429	0.004472	0.00365561	0.00356568	0.00347575	0.00338583	None	0.00382529	0.00397035	0.00358163			15.75		0.004701	0.00588	0.00456	0.004505	0.005104	0.004472	0.004894	0.004626	0.00379	0.005556	None	0.00474	0.00487033	0.0047212
16	0.00417759	0.00408773	0.003486	0.00322551	0.00287972	0.004017	0.00317684	0.00304292	0.00290899	0.00277506	None	0.00358548	0.00364559	0.00309786			16		0.00442683	0.005639	0.00396	0.004283	0.005166	0.004017	0.004404	0.004671	0.003609	0.005214	None	0.004371	0.00458197	0.0044538
16.25	0.00387906	0.00383851	0.003688	0.0036108	0.00351527	0.003674	0.00349372	0.00343451	0.00337531	0.0033161	None	0.0036669	0.00370094	0.00345731			16.25		0.003983	0.004572	0.003507	0.004275	0.004358	0.003674	0.003956	0.004234	0.003376	0.004824	None	0.003823	0.0040615	0.0040426
16.5	0.00353125	0.00349656	0.002543	0.00220202	0.0017079	0.003469	0.00222313	0.00205119	0.00187924	0.00170729	None	0.00297483	0.00282496	0.00216714			16.5		0.003582	0.004174	0.003438	0.003536	0.003925	0.003469	0.003801	0.00369	0.003449	0.004408	None	0.003748	0.00368733	0.0038192
16.75	0.00342644	0.00344528	0.001883	0.0013748	0.000603074	0.003103	0.00124073	0.000936384	0.000632041	0.000327697	None	0.00278309	0.00230593	0.00118399			16.75		0.00322417	0.003414	0.003104	0.003502	0.003703	0.003103	0.003875	0.003224	0.002733	0.003801	None	0.003554	0.00334169	0.0034374
17	0.00274438	0.00270218	0.001698	0.00133514	0.000811945	0.002417	0.00118439	0.000965235	0.000746079	0.000526922	None	0.0021383	0.00195144	0.00111219			17		0.00281883	0.003077	0.002958	0.003142	0.003193	0.002417	0.003007	0.002933	0.002319	0.003191	None	0.003216	0.00293431	0.0029332
17.25	0.0024593	0.00242008	0.001842	0.00162316	0.0013145	0.002407	0.0016313	0.00152281	0.00141432	0.00130583	None	0.00205746	0.00201101	0.00158634			17.25		0.002521	0.002917	0.002636	0.002709	0.002625	0.002407	0.002603	0.002671	0.002154	0.003318	None	0.00251	0.00263583	0.0026512
17.5	0.00215486	0.00208788	0.001846	0.00172072	0.00156629	0.002291	0.00184352	0.00181468	0.00178584	0.001757	None	0.00180744	0.00194446	0.0018017			17.5		0.00233367	0.003031	0.002313	0.002516	0.002253	0.002291	0.002575	0.002395	0.00194	0.002979	None	0.002096	0.00245628	0.002397
17.75	0.00170414	0.00159962	0.001914	0.00194911	0.00205405	0.001753	0.00199326	0.00204019	0.00208713	0.00213406	None	0.00147647	0.00182899	0.00194622			17.75		0.00209883	0.002827	0.002066	0.002144	0.002158	0.001753	0.002283	0.002076	0.001643	0.002533	None	0.002105	0.00217447	0.002128
18	0.00154255	0.00146847	0.001531	0.00150246	0.00149669	0.001482	0.0014792	0.00147215	0.00146511	0.00145806	None	0.00130834	0.00150386	0.00143657			18		0.00181233	0.002368	0.001745	0.001818	0.00203	0.001482	0.001962	0.001748	0.001516	0.002095	None	0.001893	0.00187589	0.0018428
18.25	0.00144594	0.00140999	0.001382	0.0013487	0.00131673	0.001305	0.00126628	0.0012372	0.00120812	0.00117904	None	0.00130574	0.00136806	0.00123928			18.25		0.0015565	0.001835	0.001488	0.001697	0.001765	0.001305	0.001698	0.001528	0.001359	0.001895	None	0.001583	0.00160775	0.0016126
18.5	0.00125563	0.00122866	0.001714	0.0018578	0.00208699	0.001167	0.00177924	0.00184426	0.00190928	0.0019743	None	0.00138061	0.00155168	0.00177754			18.5		0.001321	0.001548	0.001327	0.00145	0.001449	0.001167	0.001557	0.001273	0.001118	0.001678	None	0.001321	0.001377	0.0013894
18.75	0.00106542	0.00103019	0.001255	0.00130645	0.00140124	0.001047	0.00129146	0.00132211	0.00135275	0.00138339	None	0.00104269	0.00118422	0.00127848			18.75		0.00119683	0.001438	0.001139	0.0013	0.001223	0.001047	0.001395	0.001151	0.000951	0.001428	None	0.001303	0.00122397	0.0012456
19	0.00103427	0.00102157	0.001282	0.00136034	0.00148421	0.001058	0.00136523	0.00141051	0.00145579	0.00150108	None	0.00110762	0.00120673	0.00136805			19		0.0010595	0.001299	0.000959	0.00105	0.001123	0.001058	0.001162	0.000989	0.00093	0.001236	None	0.001074	0.00109142	0.0010782
19.25	0.000951914	0.000963729	0.001588	0.00180397	0.00212201	0.000881	0.00171873	0.00181405	0.00190937	0.00200469	None	0.00127756	0.0013851	0.00174488			19.25		0.0008735	0.00088	0.000844	0.000941	0.000973	0.000881	0.000945	0.00081	0.000848	0.001073	None	0.00091	0.00089875	0.0009172
19.5	0.000835346	0.00084267	0.001085	0.00117066	0.00129549	0.000798	0.00113026	0.00116619	0.00120211	0.00123804	None	0.000971462	0.00100453	0.00114161			19.5		0.000778333	0.000822	0.000747	0.000818	0.000851	0.000798	0.000809	0.000687	0.000701	0.00092	None	0.000803	0.000802389	0.000784
19.75	0.000738295	0.000747324	0.000738	0.000740911	0.000740763	0.000755	0.000750058	0.000751965	0.000753872	0.000755779	None	0.000766068	0.000743382	0.000755548			19.75		0.000666	0.000745	0.000653	0.000671	0.000696	0.000755	0.000655	0.000585	0.000585	0.000766	None	0.00064	0.000697667	0.0006462
20	0.000580657	0.000578414	0.000609	0.0006177	0.000631871	0.000606	0.000633519	0.00064197	0.000650421	0.000658872	None	0.000586608	0.00060394	0.000634278			20		0.0005545	0.000656	0.000596	0.000584	0.000548	0.000606	0.000532	0.000537	0.000514	0.000611	None	0.000562	0.00059075	0.0005512
