# Supplementary material for: GABA neurons in the ventral tegmental area regulate non-rapid eye movement sleep in mice
Source: eLife. 2019 Jun 4;8:e44928. doi: 10.7554/eLife.44928 (PMC6548506; doi:10.7554/eLife.44928)
Supplement: Figure 2—source data 1. [file elife-44928-fig2-data1.xlsx]

## Sheet: Fig 2c
			hM3Dq-Saline																											hM3Dq-CNO
			Wakefulness									REM									NREM									Wakefulness									REM									NREM
	Clock Time		Mouse 1	Mouse 2	Mouse 3	Mouse 4	Mouse 5	Mouse 6	average (S)	S.E.M		Mouse 1	Mouse 2	Mouse 3	Mouse 4	Mouse 5	Mouse 6	average (S)	S.E.M		Mouse 1	Mouse 2	Mouse 3	Mouse 4	Mouse 5	Mouse 6	average (S)	S.E.M		Mouse 1	Mouse 2	Mouse 3	Mouse 4	Mouse 5	Mouse 6	average (S)	S.E.M		Mouse 1	Mouse 2	Mouse 3	Mouse 4	Mouse 5	Mouse 6	average (S)	S.E.M		Mouse 1	Mouse 2
	17:00:00		1412	1320	1520	1020	1074	1416	1293.67	82.4693		344	164	244	240	192	184	228	26.5732		1844	2116	1836	2340	2334	2000	2078.33	92.2004		2236	1316	1844	2136	1500	1416	1741.33	158.744		164	164	208	104	212	244	182.667	20.1241		1200	2120
	18:00:00		3004	2444	2604	2692	2492	2796	2672	84.6577		76	64	120	124	144	88	102.667	12.7611		520	1092	876	784	964	716	825.333	81.6083		2076	2448	2012	2276	1844	2796	2242	140.163		232	64	128	84	12	120	106.667	30.352		1292	1088
	19:00:00		1396	2044	1844	2512	2736	2812	2224	227.539		436	324	192	284	164	92	248.667	50.643		1768	1232	1564	804	700	696	1127.33	190.201		1712	2040	1824	1812	1724	2812	1987.33	171.797		148	324	244	72	84	192	177.333	39.5126		1740	1236
	20:00:00		2808	2724	2520	1612	1468	1392	2087.33	271.103		160	244	128	164	148	288	188.667	25.6212		632	632	952	1824	1984	1920	1324	266.891		64	84	124	48	88	36	74	12.9306		0	0	0	0	0	0	0	0		3536	3516
	21:00:00		2796	2812	2100	1924	1576	2792	2333.33	219.781		16	20	32	28	36	124	42.6667	16.5462		788	768	1468	1648	1988	684	1224	224.547		256	112	288	128	248	244	212.667	30.0474		176	0	12	28	44	0	43.3333	27.4307		3168	3488
	22:00:00		2100	2200	2048	2068	2042	2264	2120.33	37.1965		64	24	36	44	32	160	60	20.7589		1436	1376	1516	1488	1526	1176	1419.67	53.7907		352	288	644	448	328	368	404.667	52.5247		0	0	32	0	48	12	15.3333	8.28922		3248	3312
	23:00:00		2268	2244	2804	2816	3084	2736	2658.67	136.3		152	32	16	36	0	72	51.3333	22.4004		1180	1324	780	748	516	792	890	123.045		1424	964	1628	1068	1168	1924	1362.67	149.768		12	32	18	92	0	16	28.3333	13.4106		2164	2604
	1900-01-01		2740	2268	2196	2744	2472	2112	2422	112.279		100	92	24	0	88	92	66	17.4279		760	1240	1380	856	1040	1396	1112	110.074		3420	3284	2888	2224	3084	2112	2835.33	223.956		4	92	88	100	36	24	57.3333	16.7066		176	224
	1900-01-01 01:00:00		3184	2812	1828	1324	646	2440	2039	390.109		44	16	20	24	12	36	25.3333	5.02438		372	772	1752	2252	2942	1124	1535.67	393.467		3388	3044	2892	2692	2540	2440	2832.67	143.318		36	16	64	72	68	20	46	10.2632		176	540
	1900-01-01 02:00:00		1760	1804	1756	1844	1842	1616	1770.33	34.5578		132	128	72	112	84	88	102.667	10.1544		1708	1668	1772	1644	1674	1896	1727	38.3519		2812	2816	2724	1520	1616	1616	2184	269.045		20	128	144	132	248	72	124	31.2922		768	656
	1900-01-01 03:00:00		1036	1860	1620	1320	1612	1332	1463.33	118.939		364	192	112	192	64	68	165.333	45.999		2200	1548	1868	2088	1924	2200	1971.33	101.705		2692	2816	2808	1532	1428	1332	2101.33	301.574		52	192	72	12	224	112	110.667	33.731		856	592
	1900-01-01 04:00:00		2724	1924	2516	1912	1808	2416	2216.67	156.227		72	64	36	92	72	164	83.3333	17.7514		804	1612	1048	1596	1720	1020	1300	158.038		1952	1924	1948	1368	2004	2416	1935.33	136.405		12	64	112	164	44	36	72	22.955		1636	1612
	1900-01-01 05:00:00		1484	1580	1608	1328	1390	1612	1500.33	49.1756		180	112	128	124	96	44	114	18.1475		1936	1908	1864	2148	2114	1944	1985.67	47.5603		1864	1580	1624	1708	1224	1612	1602	86.3775		24	112	92	248	52	128	109.333	31.8608		1712	1908
			mCherry-Saline																											mCherry-CNO
			Wakefulness									REM									NREM									Wakefulness									REM									NREM
	Clock Time		Mouse 1	Mouse 2	Mouse 3	Mouse 4			average (S)	S.E.M		Mouse 1	Mouse 2	Mouse 3	Mouse 4			average (S)	S.E.M		Mouse 1	Mouse 2	Mouse 3	Mouse 4			average (S)	S.E.M		Mouse 1	Mouse 2	Mouse 3	Mouse 4			average (S)	S.E.M		Mouse 1	Mouse 2	Mouse 3	Mouse 4			average (S)	S.E.M		Mouse 1	Mouse 2
	17:00:00		1384	1024	1604	1028			1260	142.37		460	744	196	360			440	115.019		1756	1832	1800	2212			1900	105.16		1160	456	1836	2136			1397	374.221		164	164	208	104			160	21.3542		2276	2980
	18:00:00		2604	1604	1688	2692			2147	290.316		220	192	164	196			193	11.4746		776	1804	1748	712			1260	298.418		2124	1412	2412	1592			1885	231.738		232	64	128	84			127	37.4655		1244	2124
	19:00:00		2100	1748	1804	1928			1895	77.9979		440	388	196	152			294	70.6635		1060	1464	1600	1520			1411	120.282		2136	1532	1620	2984			2068	333.127		148	324	244	72			197	55.0485		1316	1744
	20:00:00		2692	2720	2524	1812			2437	212.781		16	128	0	0			36	30.8977		892	752	1076	1788			1127	230.104		3192	1568	3196	1348			2326	503.149		0	0	0	0			0	0		408	2032
	21:00:00		2804	2812	2124	2128			2467	196.885		0	16	0	12			7	4.12311		796	772	1476	1460			1126	197.542		2804	1788	3180	2216			2497	308.542		0	0	12	28			10	6.63325		796	1812
	22:00:00		2204	2248	2252	2248			2238	11.3725		0	244	0	28			68	59.0367		1396	1108	1348	1324			1294	63.7809		2812	1220	2784	3292			2527	450.994		0	0	32	0			8	8		788	2380
	23:00:00		2244	2044	2812	2816			2479	197.676		0	392	96	108			149	84.5281		1356	1164	692	676			972	170.864		2124	1688	1868	2484			2041	172.645		0	32	18	92			35.5	19.9395		1476	1880
	1900-01-01		2736	2192	2200	2944			2518	190.7		0	252	28	16			74	59.6098		864	1156	1372	640			1008	160.873		2128	1356	2808	2984			2319	370.27		4	92	88	100			71	22.4722		1468	2152
	1900-01-01 01:00:00		2812	2188	1832	1624			2114	260.177		0	280	164	416			215	88.2478		788	1132	1604	1560			1271	193.007		2124	2124	1540	788			1644	316.801		36	16	64	72			47	12.897		1440	1460
	1900-01-01 02:00:00		1764	1856	1720	1688			1757	36.492		0	444	56	472			243	124.786		1836	1300	1824	1440			1600	135.853		2136	1116	2028	1432			1678	243.006		20	128	144	132			106	28.8675		1444	2356
	1900-01-01 03:00:00		1236	1660	1328	1328			1388	93.2237		304	400	0	64			192	95.331		2060	1540	2272	2208			2020	166.044		1640	456	2168	3004			1817	533.528		52	192	72	12			82	38.7298		1908	2952
	1900-01-01 04:00:00		2524	1724	2516	1916			2170	205.845		240	100	0	216			139	55.5068		836	1776	1084	1468			1291	207.45		1948	2412	2756	1348			2116	304.858		12	64	112	164			88	32.5372		1640	1124
	1900-01-01 05:00:00		1608	1576	1528	1340			1513	59.9639		0	220	0	104			81	52.4182		1992	1804	2072	2156			2006	75.1975		2168	2020	1852	2724			2191	189.028		0	112	92	248			113	51.1827		1432	1468
[truncated: 6 more columns]

## Sheet: Fig 2d
		hM3-sal								hM3-CNO								mCh-sal							mCh-CNO							percent
							ave	sem						ave	sem							ave	sem						ave	sem		hm3-sal	hm3-cno
Wakefulness		mouse 1	2808	2796	2100	2268	2493	181.684		64	256	352	1424	524	305.915			2692	2804	2204	2244	2486	153.201		3192	2804	2812	2124	2733	222.269		100	21.0189
		mouse 2	2724	2812	2200	2244	2495	158.891		84	112	288	964	362	205.683			2720	2812	2248	2044	2456	184.716		1568	1788	1220	1688	1566	123.79		100	14.509
		mouse 3	2520	2100	2048	2804	2368	179.681		124	288	644	1628	671	336.956			2524	2124	2252	2812	2428	152.77		3196	3180	2784	1868	2757	311.274		100	28.3361
		mouse 4	1612	1924	2068	2816	2105	255.392		48	128	448	1068	423	231.715			1812	2128	2248	2816	2251	209.58		1348	2216	3292	2484	2335	400.664		100	20.095
		mouse 5	1468	1576	2042	3084	2042.5	368.826		88	248	328	1168	458	241.868																	100	22.4235
		mouse 6	1392	2792	2264	2736	2296	323.761		36	244	368	1924	643	432.458																	100	28.0052
		ave	2087.33	2333.33	2120.33	2658.67	2299.92	131.422		74	212.667	404.667	1362.67	513.5	291.06			2437	2467	2238	2479	2405.25	56.4452		2326	2497	2527	2041	2347.75	111.421		100	22.398
		sem	271.103	219.781	37.1965	136.3	166.095	51.1627		12.9306	30.0474	52.5247	149.768	61.3178	30.5778			212.781	196.885	11.3725	197.676	154.678	47.9084		503.149	308.542	450.994	172.645	358.833	74.4512		0	2.1303
REM		mouse 1	160	16	64	152	98	34.9285		0	176	0	12	47	43.0929			16	0	0	0	4	4		0	0	0	0	0	0		100	47.9592
		mouse 2	244	20	24	32	80	54.7235		0	0	0	32	8	8			128	16	244	392	195	80.4881		0	0	0	32	8	8		100	10
		mouse 3	128	32	36	16	53	25.3706		0	12	32	18	15.5	6.65207			0	0	0	96	24	24		0	12	32	18	15.5	6.65207		100	29.2453
		mouse 4	164	28	44	36	68	32.1662		0	28	0	92	30	21.6949			0	12	28	108	37	24.3516		0	28	0	92	30	21.6949		100	44.1176
		mouse 5	148	36	32	0	54	32.3522		0	44	48	0	23	13.3041																	100	42.5926
		mouse 6	288	124	160	72	161	46.0254		0	0	12	16	7	4.12311																	100	4.34783
		ave	188.667	42.6667	60	51.3333	85.6667	34.5152		0	43.3333	15.3333	28.3333	21.75	9.23497			36	7	68	149	65	30.6458		0	10	8	35.5	13.375	7.68487		100	29.7104
		sem	25.6212	16.5462	20.7589	22.4004	21.3317	1.88791		0	27.4307	8.28922	13.4106	12.2826	5.75577			30.8977	4.12311	59.0367	84.5281	44.6464	17.3896		0	6.63325	8	19.9395	8.64319	4.15095		0	7.61252
NREM		mouse 1	632	788	1436	1180	1009	183.153		3536	3168	3248	2164	3029	298.964			892	796	1396	1356	1110	155.035		408	796	788	1476	867	222.269		100	300.198
		mouse 2	632	768	1376	1324	1025	189.978		3516	3488	3312	2604	3230	213.495			752	772	1108	1164	949	108.645		2032	1812	2380	1880	2026	126.644		100	315.122
		mouse 3	952	1468	1516	780	1179	184.35		3476	3300	2924	1954	2913.5	339.919			1076	1476	1348	692	1148	173.374		404	408	784	1714	827.5	308.64		100	247.116
		mouse 4	1824	1648	1488	748	1427	236.504		3552	3444	3152	2440	3147	250.351			1788	1460	1324	676	1312	233.295		2252	1356	308	1024	1235	403.4		100	220.533
		mouse 5	1984	1988	1526	516	1503.5	346.564		3512	3308	3224	2432	3119	236.848																	100	207.449
		mouse 6	1920	684	1176	792	1143	279.687		3564	3356	3220	1660	2950	435.778																	100	258.093
		ave	1324	1224	1419.67	890	1214.42	115.28		3526	3344	3180	2209	3064.75	293.871			1127	1126	1294	972	1129.75	65.7551		1274	1093	1065	1523.5	1238.88	105.577		100	258.085
		sem	266.891	224.547	53.7907	123.045	167.068	48.3376		12.9306	46.579	55.3486	144.634	64.8729	28.1146			230.104	197.542	63.7809	170.864	165.573	36.0276		503.149	308.702	452.582	185.997	362.607	71.8472		0	17.4368

## Sheet: Fig 2e
	pre						1 hr post						4 hr post												pre						1 hr post						4 hr post
hM3Dq-Saline FFT	mouse 1	mouse 2	mouse 3	mouse 4	mouse 5	mouse 6	mouse 1	mouse 2	mouse 3	mouse 4	mouse 5	mouse 6	mouse 1	mouse 2	mouse 3	mouse 4	mouse 5	mouse 6						hM3Dq-Saline FFT	mouse 1	mouse 2	mouse 3	mouse 4	mouse 5	mouse 6	mouse 1	mouse 2	mouse 3	mouse 4	mouse 5	mouse 6	mouse 1	mouse 2	mouse 3	mouse 4	mouse 5	mouse 6
	S	S	S	S	S	S	S	S	S	S	S	S	S	S	S	S	S	S	average						S	S	S	S	S	S	S	S	S	S	S	S	S	S	S	S	S	S	average
Hz	uV^2	uV^2	uV^2	uV^2	uV^2	uV^2	uV^2	uV^2	uV^2	uV^2	uV^2	uV^2	uV^2	uV^2	uV^2	uV^2	uV^2	uV^2	pre	1 hr post	4 hr post			Hz	0.0678615	0.06829	0.0678185	0.067869	0.0687355	0.0769305	0.0678615	0.06829	0.0678185	0.067869	0.0687355	0.0769305	0.0678615	0.06829	0.0678185	0.067869	0.0687355	0.0769305	pre	sem	1 hr post	sem	4 hr post	sem
0	0.0008415	0.000916	0.000889	0.0008615	0.0006825	0.0006915	0.000686	0.000997	0.000835	0.000943	0.00078	0.000585	0.000798	0.000857	0.000852	0.000906	0.000811	0.000922	0.000813667	0.000804333	0.000857667			0	0.0124003	0.0134981	0.0131002	0.012695	0.0100572	0.0101899	0.0101088	0.0146917	0.0123045	0.0138959	0.011494	0.0086205	0.0117592	0.0126287	0.012555	0.0133507	0.0119508	0.0135865	0.0119901	0.000609594	0.0118526	0.000931946	0.0126385	0.00147638
0.25	0.0033255	0.003463	0.0035305	0.003527	0.003019	0.002903	0.002946	0.003705	0.003221	0.00384	0.003214	0.002824	0.002982	0.003053	0.002991	0.003187	0.003441	0.002969	0.00329467	0.00329167	0.00310383			0.25	0.0490042	0.0510304	0.0520251	0.0519735	0.0444877	0.0427783	0.0434119	0.0545965	0.0474643	0.0565858	0.0473612	0.0416142	0.0439424	0.0449887	0.0440751	0.0469633	0.0507062	0.0437509	0.0485499	0.00163269	0.0485057	0.00243735	0.0457378	0.000297715
0.5	0.006037	0.0060005	0.0066005	0.0065865	0.0058125	0.005463	0.006207	0.005867	0.006134	0.007067	0.006106	0.005519	0.005407	0.006123	0.004906	0.006399	0.007161	0.005912	0.00608333	0.00615	0.00598467			0.5	0.0889606	0.0884227	0.0972643	0.097058	0.0856524	0.0805022	0.0914657	0.0864555	0.09039	0.104139	0.0899774	0.0813274	0.079677	0.0902279	0.0722943	0.094295	0.105524	0.0871186	0.0896434	0.00267395	0.0906258	0.00309639	0.0881894	0.0011058
0.75	0.0099225	0.010217	0.0105535	0.010536	0.009406	0.008139	0.01021	0.009635	0.010799	0.010308	0.010764	0.008048	0.00823	0.011383	0.007298	0.011081	0.013235	0.011017	0.00979567	0.00996067	0.010374			0.75	0.146217	0.150557	0.155515	0.155257	0.138606	0.119935	0.150453	0.14198	0.159133	0.151898	0.158617	0.118594	0.121276	0.167739	0.107543	0.163288	0.19503	0.162345	0.144348	0.0055218	0.146779	0.00619101	0.15287	0.00471938
1	0.0143825	0.0140155	0.015525	0.014972	0.0119665	0.01201	0.015521	0.013244	0.014787	0.016263	0.013681	0.010252	0.013768	0.016298	0.01186	0.017708	0.015934	0.016558	0.0138119	0.013958	0.0153543			1	0.211939	0.206531	0.228775	0.220626	0.176337	0.176978	0.228716	0.195162	0.2179	0.23965	0.201602	0.151072	0.202884	0.240166	0.174768	0.260943	0.234802	0.243997	0.203531	0.00904386	0.205684	0.0128364	0.22626	0.0132282
1.25	0.0199365	0.018305	0.0205095	0.0208595	0.016616	0.0163255	0.022411	0.017462	0.019148	0.021871	0.019848	0.013384	0.019267	0.021298	0.017606	0.023082	0.020479	0.021804	0.0187587	0.0190207	0.0205893			1.25	0.293782	0.269741	0.302226	0.307383	0.244852	0.240571	0.330246	0.257318	0.282163	0.322289	0.292478	0.197225	0.283917	0.313845	0.25944	0.340134	0.301776	0.321301	0.276426	0.0119058	0.280287	0.0198654	0.303402	0.0128864
1.5	0.02371	0.0221925	0.0239905	0.025769	0.021595	0.02148	0.025238	0.022182	0.022203	0.025778	0.02576	0.01743	0.02553	0.025918	0.022958	0.026638	0.027337	0.023619	0.0231228	0.0230985	0.0253333			1.5	0.349388	0.327026	0.353522	0.379729	0.318222	0.316527	0.371905	0.326872	0.327181	0.379862	0.379597	0.256847	0.376207	0.381925	0.338307	0.392535	0.402835	0.348047	0.340736	0.010066	0.340377	0.019515	0.373309	0.0116814
1.75	0.029442	0.026502	0.026643	0.0270995	0.026038	0.028708	0.031443	0.027441	0.025563	0.027723	0.026476	0.0256	0.031816	0.029226	0.02594	0.030434	0.031252	0.029393	0.0274054	0.0273743	0.0296768			1.75	0.433854	0.390531	0.392608	0.399335	0.383693	0.423038	0.463341	0.404368	0.376694	0.408523	0.390148	0.377239	0.468837	0.430671	0.382249	0.448472	0.460526	0.433132	0.403843	0.0081627	0.403385	0.0131572	0.437315	0.0103076
2	0.0334305	0.0289685	0.0301585	0.0314265	0.030529	0.031108	0.037869	0.028992	0.028945	0.031372	0.031481	0.029577	0.032639	0.033233	0.031586	0.034382	0.036214	0.036556	0.0309368	0.0313727	0.0341017			2	0.492628	0.426877	0.444413	0.463098	0.449872	0.458404	0.558034	0.427223	0.426531	0.462295	0.463901	0.435844	0.480965	0.489718	0.465448	0.50665	0.533646	0.538685	0.455882	0.00897718	0.462304	0.020312	0.502519	0.0125841
2.25	0.040974	0.0331555	0.036511	0.0365935	0.032865	0.0327515	0.049851	0.032097	0.034214	0.038808	0.034379	0.031351	0.034152	0.037989	0.038948	0.039338	0.039519	0.044496	0.0354751	0.0367833	0.0390737			2.25	0.603789	0.488576	0.538022	0.539238	0.484295	0.482623	0.734599	0.472978	0.504174	0.571871	0.506605	0.461985	0.50326	0.559802	0.573934	0.579681	0.582348	0.655688	0.522757	0.0194329	0.542035	0.0415679	0.575785	0.0119675
2.5	0.0536435	0.044399	0.042072	0.040251	0.0350995	0.037055	0.059391	0.047896	0.040902	0.043242	0.03726	0.032939	0.041171	0.040566	0.044999	0.041753	0.045252	0.050415	0.0420867	0.043605	0.044026			2.5	0.790485	0.654259	0.619969	0.593135	0.517223	0.546039	0.87518	0.70579	0.602728	0.63721	0.549059	0.485386	0.606692	0.597776	0.663101	0.615268	0.666829	0.74291	0.620185	0.0395786	0.642559	0.0557289	0.648763	0.0199679
2.75	0.061293	0.0556275	0.0507145	0.047896	0.042026	0.042545	0.063006	0.05958	0.051675	0.049754	0.046038	0.038014	0.047076	0.039765	0.051946	0.046177	0.052022	0.060821	0.050017	0.0513445	0.0496345			2.75	0.903207	0.819721	0.747324	0.70579	0.619291	0.626939	0.92845	0.877965	0.761477	0.73317	0.678411	0.56017	0.693707	0.585973	0.765471	0.680459	0.766591	0.896252	0.737045	0.0452833	0.756607	0.0546299	0.731409	0.0222764
3	0.0629415	0.061361	0.058783	0.0543525	0.0528105	0.0547795	0.062687	0.063196	0.059526	0.05804	0.050665	0.054956	0.054603	0.040923	0.066617	0.053336	0.055287	0.068758	0.0575047	0.0581783	0.0565873			3	0.927499	0.904209	0.86622	0.800933	0.77821	0.807225	0.923749	0.93125	0.877169	0.855271	0.746594	0.809826	0.804624	0.603037	0.981661	0.785954	0.814703	1.01321	0.847383	0.0248716	0.85731	0.0287475	0.833865	0.0427162
3.25	0.0678615	0.06829	0.06538	0.065225	0.06697	0.0676055	0.062305	0.073418	0.063162	0.067598	0.062852	0.071088	0.064123	0.049307	0.078832	0.062504	0.062717	0.081116	0.0668887	0.0667372	0.0664332			3.25	1	1.00631	0.963433	0.961149	0.986863	0.996228	0.91812	1.08188	0.930749	0.996117	0.926181	1.04755	0.94491	0.726583	1.16166	0.921052	0.924191	1.19532	0.985664	0.00783199	0.983432	0.0284502	0.978952	0.0607749
3.5	0.065694	0.067948	0.0678185	0.067869	0.0687355	0.0769305	0.056688	0.0747	0.061196	0.074441	0.061297	0.076174	0.077687	0.057929	0.082536	0.067128	0.056222	0.068915	0.0691659	0.067416	0.0684028			3.5	0.96806	1.00127	0.999366	1.00011	1.01288	1.13364	0.835348	1.10077	0.901778	1.09695	0.903266	1.12249	1.14479	0.853636	1.21624	0.989191	0.828482	1.01552	1.01922	0.023686	0.993435	0.0517739	1.00798	0.071039
3.75	0.057521	0.0600885	0.0583235	0.0555625	0.0637485	0.071332	0.054812	0.06023	0.059947	0.0567	0.054425	0.073072	0.069592	0.053898	0.067257	0.063901	0.04417	0.059208	0.061096	0.0598643	0.059671			3.75	0.847623	0.885458	0.859449	0.818763	0.939391	1.05114	0.807704	0.887543	0.883373	0.835525	0.802001	1.07678	1.0255	0.794235	0.991092	0.941638	0.650885	0.872483	0.900304	0.0344448	0.882155	0.0416541	0.879306	0.0628599
4	0.046704	0.049767	0.0486855	0.045085	0.050654	0.057862	0.045749	0.047659	0.051875	0.045496	0.044674	0.056634	0.05909	0.041742	0.047992	0.050772	0.036771	0.045503	0.0497929	0.0486812	0.0469783			4	0.688225	0.733361	0.717424	0.664368	0.746432	0.852648	0.674153	0.702298	0.764425	0.670424	0.658311	0.834553	0.870744	0.615106	0.707205	0.748171	0.541854	0.670527	0.733743	0.0267399	0.717361	0.0281263	0.692268	0.0569252
4.25	0.039279	0.03921	0.0408775	0.0386755	0.039092	0.044048	0.041286	0.037272	0.041148	0.040607	0.036744	0.04144	0.046656	0.036098	0.037982	0.043721	0.035026	0.032092	0.040197	0.0397495	0.0385958			4.25	0.578811	0.577794	0.602367	0.569918	0.576056	0.649087	0.608386	0.549236	0.606353	0.598381	0.541456	0.610656	0.687518	0.531936	0.559699	0.644268	0.516139	0.472904	0.592339	0.0122246	0.585744	0.0129253	0.568744	0.0462793
4.5	0.0358935	0.033925	0.032784	0.031888	0.0337495	0.034913	0.037094	0.034693	0.033157	0.032411	0.031365	0.036134	0.033692	0.030079	0.034592	0.033829	0.028417	0.02848	0.0338588	0.0341423	0.0315148			4.5	0.528923	0.499915	0.483102	0.469898	0.497329	0.514474	0.546613	0.511232	0.488598	0.477605	0.462191	0.532467	0.496482	0.443241	0.509744	0.498501	0.41875	0.419678	0.49894	0.00863735	0.503118	0.0133613	0.464399	0.0332667
4.75	0.0325065	0.029795	0.031208	0.03064	0.0291025	0.0306205	0.034977	0.030036	0.029554	0.032862	0.028418	0.029787	0.031454	0.024751	0.027431	0.029367	0.02357	0.028917	0.0306454	0.030939	0.0275817			4.75	0.479012	0.439056	0.459878	0.451508	0.428851	0.451221	0.515417	0.442607	0.435505	0.484251	0.418765	0.438938	0.463503	0.364728	0.40422	0.432749	0.347325	0.426118	0.451588	0.00705919	0.455914	0.0148386	0.406441	0.0171073
5	0.0295785	0.027297	0.027446	0.0259085	0.0268375	0.028922	0.031669	0.027488	0.027106	0.027786	0.024031	0.029644	0.0282	0.02511	0.024505	0.027003	0.02386	0.028043	0.0276649	0.027954	0.0261202			5	0.435866	0.402246	0.404441	0.381785	0.395475	0.426192	0.466671	0.40506	0.399431	0.409452	0.354118	0.436831	0.415552	0.370018	0.361103	0.397913	0.351598	0.413239	0.407667	0.00815814	0.411927	0.0154579	0.384904	0.0178652
5.25	0.025182	0.0250585	0.0253715	0.023295	0.0261175	0.028794	0.026075	0.024289	0.025828	0.024915	0.021675	0.03056	0.027028	0.022796	0.026656	0.026077	0.023596	0.022599	0.0256364	0.025557	0.024792			5.25	0.371079	0.369259	0.373872	0.343273	0.384865	0.424305	0.384238	0.35792	0.380599	0.367145	0.319401	0.450329	0.398282	0.335919	0.3928	0.384268	0.347708	0.333017	0.377776	0.0108602	0.376605	0.0175313	0.365332	0.0112676
5.5	0.02308	0.0226835	0.022728	0.022938	0.0250005	0.0259875	0.02308	0.02308	0.022287	0.023169	0.022707	0.027294	0.024681	0.018751	0.023361	0.023885	0.023676	0.023319	0.0237363	0.0236028	0.0229455			5.5	0.340104	0.334262	0.334917	0.338012	0.368405	0.382949	0.340104	0.340104	0.328419	0.341416	0.334608	0.402202	0.363697	0.276313	0.344245	0.351967	0.348887	0.343626	0.349775	0.00844765	0.347809	0.011058	0.338122	0.0121364
5.75	0.0230455	0.022375	0.022231	0.0211415	0.0227165	0.0243725	0.023972	0.022119	0.022631	0.021831	0.020452	0.024981	0.023764	0.019383	0.02198	0.023668	0.025778	0.020144	0.022647	0.0226643	0.0224528			5.75	0.339596	0.329716	0.327594	0.311539	0.334748	0.359151	0.353249	0.325943	0.333488	0.321699	0.301379	0.368117	0.350184	0.285626	0.323895	0.348769	0.379862	0.29684	0.333724	0.00639757	0.333979	0.00968703	0.330863	0.0127146
6	0.023996	0.0229125	0.022797	0.0211945	0.0210465	0.022467	0.026534	0.021458	0.024367	0.021227	0.021162	0.020931	0.024003	0.019809	0.019798	0.023766	0.023128	0.021397	0.0224023	0.0226132	0.0219835			6	0.353603	0.337636	0.335934	0.31232	0.310139	0.331071	0.391002	0.316203	0.35907	0.312799	0.311841	0.308437	0.353706	0.291903	0.291741	0.350213	0.340812	0.315304	0.330117	0.00672982	0.333225	0.0138863	0.323947	0.0145457
6.25	0.0227295	0.021417	0.020655	0.0217185	0.0206665	0.0196845	0.023693	0.021766	0.021068	0.020242	0.023195	0.018138	0.021231	0.019616	0.020678	0.023258	0.022551	0.021035	0.0211452	0.0213503	0.0213948			6.25	0.33494	0.315599	0.30437	0.320042	0.304539	0.290069	0.349138	0.320742	0.310456	0.298284	0.341799	0.26728	0.312858	0.289059	0.304709	0.342727	0.332309	0.30997	0.311593	0.0063185	0.314616	0.0122379	0.315272	0.011545
6.5	0.0213235	0.020147	0.0190495	0.0220225	0.0230875	0.020727	0.020515	0.022132	0.018162	0.019937	0.024108	0.022067	0.019387	0.019194	0.019039	0.022478	0.023033	0.019183	0.0210595	0.0211535	0.0203857			6.5	0.314221	0.296884	0.280711	0.324521	0.340215	0.305431	0.302307	0.326135	0.267633	0.29379	0.355253	0.325177	0.285685	0.282841	0.280557	0.331233	0.339412	0.282679	0.310331	0.00854731	0.311716	0.0124335	0.300401	0.00790927
6.75	0.0199945	0.01807	0.0191965	0.0207015	0.0215315	0.0209175	0.021607	0.018382	0.017758	0.020635	0.020768	0.022295	0.01954	0.019866	0.017288	0.022732	0.021278	0.022713	0.0200686	0.0202408	0.0205695			6.75	0.294637	0.266278	0.282878	0.305055	0.317286	0.308238	0.318399	0.270875	0.26168	0.304075	0.306035	0.328537	0.287939	0.292743	0.254754	0.334976	0.31355	0.334696	0.295729	0.00761991	0.298267	0.0108082	0.30311	0.0111135
7	0.019044	0.017891	0.019649	0.019569	0.0185575	0.019612	0.020536	0.017552	0.01823	0.021068	0.01807	0.019045	0.020179	0.019675	0.017857	0.021611	0.018757	0.020919	0.0190537	0.0190835	0.019833			7	0.28063	0.26364	0.289546	0.288367	0.273461	0.289	0.302616	0.258644	0.268635	0.310456	0.266278	0.280645	0.297356	0.289929	0.263139	0.318457	0.276401	0.30826	0.280774	0.00427916	0.281212	0.0085716	0.292257	0.0126466
7.25	0.0183985	0.0174475	0.019238	0.0188035	0.018986	0.0212525	0.01973	0.017067	0.017828	0.020648	0.016959	0.021013	0.021492	0.01943	0.016738	0.020402	0.018753	0.01812	0.019021	0.0188742	0.0191558			7.25	0.271118	0.257105	0.283489	0.277086	0.279776	0.313175	0.290739	0.251498	0.262712	0.304267	0.249906	0.309645	0.316704	0.286318	0.246649	0.300642	0.276342	0.267014	0.280291	0.00758034	0.278128	0.0109224	0.282278	0.00831315
7.5	0.018798	0.0173375	0.018137	0.017308	0.017902	0.0199975	0.0201	0.017496	0.017179	0.019095	0.015521	0.020283	0.019712	0.019835	0.016108	0.021066	0.018228	0.01918	0.0182467	0.018279	0.0190215			7.5	0.277005	0.255484	0.267265	0.255049	0.263802	0.294681	0.296192	0.257819	0.253148	0.281382	0.228716	0.298888	0.290474	0.292286	0.237366	0.310426	0.268606	0.282634	0.268881	0.00613969	0.269357	0.0112314	0.280299	0.0101264
7.75	0.01926	0.017466	0.018282	0.0165275	0.0163695	0.018964	0.021437	0.017083	0.017849	0.018715	0.01434	0.018399	0.019529	0.018334	0.015735	0.021523	0.018876	0.020218	0.0178115	0.0179705	0.0190358			7.75	0.283813	0.257377	0.269402	0.243548	0.241219	0.279452	0.315893	0.251733	0.263021	0.275782	0.211313	0.271126	0.287777	0.270168	0.231869	0.317161	0.278155	0.29793	0.262468	0.00736557	0.264811	0.0139116	0.28051	0.0102312
8	0.0182245	0.0173915	0.0177805	0.01648	0.0152455	0.017366	0.019382	0.017067	0.017716	0.017845	0.015115	0.015376	0.019356	0.019019	0.01516	0.019568	0.018377	0.016068	0.0170813	0.0170835	0.0179247			8	0.268554	0.256279	0.262012	0.242848	0.224656	0.255904	0.285611	0.251498	0.261061	0.262962	0.222733	0.226579	0.285228	0.280262	0.223396	0.288352	0.270802	0.236776	0.251709	0.00642593	0.251741	0.00972043	0.264136	0.0118011
8.25	0.016524	0.01652	0.0172995	0.016426	0.0148595	0.0163215	0.016873	0.016175	0.016865	0.017734	0.015118	0.014601	0.018042	0.017714	0.014679	0.017617	0.017531	0.0167	0.0163251	0.0162277	0.0170472			8.25	0.243496	0.243437	0.254924	0.242052	0.218968	0.240512	0.248639	0.238353	0.248521	0.261326	0.222777	0.215159	0.265865	0.261032	0.216308	0.259602	0.258335	0.246089	0.240565	0.00480157	0.239129	0.0071038	0.251205	0.0111715
8.5	0.0156575	0.0152085	0.015439	0.015318	0.0141485	0.0158285	0.015903	0.015412	0.015005	0.015873	0.014763	0.013534	0.018123	0.01717	0.014589	0.017761	0.018181	0.018167	0.0152667	0.0150817	0.0173318			8.5	0.230727	0.224111	0.227507	0.225724	0.208491	0.233247	0.234345	0.22711	0.221112	0.233903	0.217546	0.199436	0.267059	0.253015	0.214982	0.261724	0.267913	0.267707	0.224968	0.00356355	0.222242	0.00532169	0.2554	0.00747615
8.75	0.015869	0.0157115	0.0158895	0.014887	0.0139025	0.0156265	0.016797	0.014941	0.016482	0.015297	0.014477	0.013328	0.017925	0.016791	0.01297	0.018912	0.01723	0.014707	0.0153143	0.0152203	0.0164225			8.75	0.233844	0.231523	0.234146	0.219373	0.204866	0.23027	0.247519	0.220169	0.242877	0.225415	0.213332	0.1964	0.264141	0.24743	0.191125	0.278685	0.253899	0.216721	0.22567	0.0047136	0.224285	0.00774864	0.242	0.00841282
9	0.015387	0.015168	0.0156225	0.0144115	0.0131095	0.0142575	0.016634	0.01414	0.016196	0.015049	0.013774	0.012445	0.01607	0.015465	0.012829	0.018143	0.015136	0.014027	0.0146593	0.0147063	0.0152783			9	0.226741	0.223514	0.230212	0.212366	0.19318	0.210097	0.245117	0.208366	0.238663	0.22176	0.202972	0.183388	0.236806	0.227891	0.189047	0.267353	0.223043	0.2067	0.216018	0.00560533	0.216711	0.00945704	0.22514	0.0132092
9.25	0.0140255	0.014214	0.0153325	0.0142285	0.0126785	0.0139065	0.014547	0.013504	0.014924	0.015741	0.012716	0.012641	0.015172	0.015275	0.012752	0.017003	0.01523	0.01531	0.0140643	0.0140122	0.0151237			9.25	0.206678	0.209456	0.225938	0.20967	0.186829	0.204925	0.214363	0.198994	0.219919	0.231958	0.187382	0.186276	0.223573	0.225091	0.187912	0.250554	0.224428	0.225607	0.207249	0.00510789	0.206482	0.0075737	0.222861	0.0109129
9.5	0.0129655	0.013333	0.0141595	0.013909	0.01261	0.01327	0.012436	0.013495	0.013171	0.015148	0.01267	0.01255	0.01399	0.01357	0.011519	0.01742	0.015518	0.014815	0.0133745	0.013245	0.014472			9.5	0.191058	0.196474	0.208653	0.204962	0.18582	0.195545	0.183256	0.198861	0.194086	0.223219	0.186704	0.184935	0.206155	0.199966	0.169743	0.256699	0.228672	0.218312	0.197085	0.0034729	0.195177	0.00610993	0.213258	0.00817276
9.75	0.0129795	0.013996	0.015176	0.0145845	0.0126665	0.013434	0.012178	0.013781	0.014211	0.016141	0.013028	0.012305	0.014563	0.012889	0.011837	0.016341	0.014951	0.011952	0.0138061	0.0136073	0.0137555			9.75	0.191265	0.206244	0.223632	0.214916	0.186652	0.197962	0.179454	0.203075	0.209412	0.237852	0.191979	0.181325	0.214599	0.189931	0.174429	0.240799	0.220316	0.176123	0.203445	0.00579467	0.200516	0.00887778	0.2027	0.0119317
10	0.0138095	0.014307	0.0142565	0.014019	0.0127215	0.013093	0.013022	0.014597	0.014017	0.014496	0.013542	0.011901	0.014285	0.012841	0.012343	0.015093	0.015162	0.010992	0.0137011	0.0135958	0.0134527			10	0.203495	0.210826	0.210082	0.206583	0.187463	0.192937	0.191891	0.2151	0.206553	0.213612	0.199554	0.175372	0.210502	0.189224	0.181885	0.222409	0.223426	0.161977	0.201898	0.00391524	0.200347	0.00613189	0.198237	0.0109119
10.25	0.0135905	0.0130985	0.013739	0.013037	0.0110865	0.0123965	0.013779	0.013402	0.012795	0.014683	0.011391	0.010782	0.014011	0.012215	0.011691	0.014258	0.013739	0.011684	0.0128247	0.0128053	0.012933			10.25	0.200268	0.193018	0.202456	0.192112	0.16337	0.182674	0.203046	0.19749	0.188546	0.216367	0.167857	0.158882	0.206465	0.179999	0.172277	0.210104	0.202456	0.172174	0.188983	0.0058618	0.188698	0.00889215	0.190579	0.0100542
10.5	0.012544	0.0125595	0.012019	0.010988	0.0105735	0.012304	0.012253	0.012835	0.012284	0.011754	0.010222	0.010925	0.013683	0.011769	0.010884	0.013776	0.012289	0.011443	0.0118313	0.0117122	0.0123073			10.5	0.184847	0.185075	0.177111	0.161918	0.15581	0.18131	0.180559	0.189135	0.181016	0.173206	0.15063	0.16099	0.201631	0.173427	0.160385	0.203002	0.181089	0.168623	0.174345	0.00509765	0.172589	0.00584641	0.18136	0.00721178
10.75	0.012211	0.0123305	0.012185	0.011555	0.0114245	0.0122165	0.01308	0.011342	0.013319	0.011051	0.012059	0.01079	0.013643	0.011341	0.011254	0.014247	0.012501	0.012218	0.0119871	0.0119402	0.012534			10.75	0.17994	0.181701	0.179557	0.170273	0.16835	0.180021	0.192746	0.167135	0.196267	0.162846	0.1777	0.159	0.201042	0.16712	0.165838	0.209942	0.184213	0.180043	0.17664	0.00235017	0.175949	0.00641524	0.1847	0.0071751
11	0.0122445	0.011739	0.0121945	0.0115565	0.0107815	0.0120405	0.013412	0.011077	0.012401	0.011988	0.011125	0.010438	0.013643	0.011082	0.01098	0.013692	0.011583	0.012495	0.0117594	0.0117402	0.0122458			11	0.180434	0.172985	0.179697	0.170295	0.158875	0.177428	0.197638	0.16323	0.18274	0.176654	0.163937	0.153813	0.201042	0.163303	0.1618	0.201764	0.170686	0.184125	0.173286	0.00329672	0.173002	0.00648324	0.180453	0.0072824
11.25	0.011693	0.011255	0.0120255	0.010992	0.0098915	0.011298	0.013143	0.010243	0.012267	0.011784	0.0102	0.009583	0.013013	0.011063	0.010571	0.012926	0.011079	0.012387	0.0111925	0.0112033	0.0118398			11.25	0.172307	0.165853	0.177207	0.161977	0.14576	0.166486	0.193674	0.15094	0.180765	0.173648	0.150306	0.141214	0.191758	0.163023	0.155773	0.190476	0.163259	0.182534	0.164932	0.0044144	0.165091	0.00841593	0.174471	0.00736881
11.5	0.010772	0.010598	0.010772	0.010352	0.009281	0.010083	0.011276	0.010268	0.010928	0.010616	0.010088	0.008474	0.011692	0.010208	0.009528	0.012949	0.010109	0.012892	0.0103097	0.010275	0.0112297			11.5	0.158735	0.156171	0.158735	0.152546	0.136764	0.148582	0.166162	0.151308	0.161034	0.156436	0.148656	0.124872	0.172292	0.150424	0.140404	0.190815	0.148965	0.189975	0.151922	0.00342639	0.151411	0.00590865	0.165479	0.00639372
11.75	0.010338	0.010287	0.010809	0.01053	0.009362	0.0097675	0.010287	0.010389	0.010185	0.011433	0.009627	0.009097	0.010438	0.010309	0.01062	0.012764	0.01	0.010563	0.0101822	0.0101697	0.0107823			11.75	0.15234	0.151588	0.15928	0.155169	0.137957	0.143933	0.151588	0.153091	0.150085	0.168475	0.141862	0.134052	0.153813	0.151912	0.156495	0.188089	0.147359	0.155655	0.150045	0.00317627	0.149859	0.00473939	0.158887	0.00897503
12	0.009641	0.0097955	0.0104445	0.0105705	0.009801	0.009673	0.009866	0.009416	0.010175	0.010714	0.010427	0.009175	0.010171	0.010092	0.010035	0.012022	0.011686	0.009809	0.00998758	0.00996217	0.0106358			12	0.142069	0.144345	0.153909	0.155766	0.144427	0.14254	0.145384	0.138753	0.149938	0.15788	0.153651	0.135202	0.149879	0.148715	0.147875	0.177155	0.172204	0.144544	0.147176	0.00246484	0.146801	0.00356292	0.156729	0.00598945
12.25	0.009547	0.009386	0.0098085	0.009242	0.00857	0.009295	0.010243	0.008851	0.009921	0.009696	0.008788	0.008352	0.010238	0.009543	0.009045	0.012102	0.011008	0.010015	0.00930808	0.0093085	0.0103252			12.25	0.140684	0.138311	0.144537	0.136189	0.126287	0.13697	0.15094	0.130427	0.146195	0.142879	0.129499	0.123074	0.150866	0.140625	0.133286	0.178334	0.162213	0.14758	0.137163	0.00249913	0.137169	0.00449684	0.152151	0.00575819
12.5	0.0099505	0.0096585	0.0098755	0.008333	0.0074515	0.0091185	0.010893	0.009008	0.010309	0.009442	0.007224	0.007679	0.010558	0.009095	0.00817	0.01234	0.009423	0.009748	0.00906458	0.0090925	0.009889			12.5	0.14663	0.142327	0.145524	0.122794	0.109805	0.134369	0.160518	0.132741	0.151912	0.139136	0.106452	0.113157	0.155582	0.134023	0.120392	0.181841	0.138856	0.143646	0.133575	0.00597687	0.133986	0.0086513	0.145723	0.0065779
12.75	0.010063	0.009174	0.00985	0.0087455	0.007941	0.008942	0.011564	0.008562	0.009786	0.009914	0.007577	0.008305	0.009579	0.009064	0.008574	0.011775	0.010022	0.008952	0.00911925	0.00928467	0.009661			12.75	0.148287	0.135187	0.145149	0.128873	0.117018	0.131768	0.170406	0.126169	0.144205	0.146092	0.111654	0.122382	0.141155	0.133566	0.126346	0.173515	0.147683	0.131916	0.13438	0.00464982	0.136818	0.00860963	0.142363	0.00862497
13	0.009642	0.008929	0.0090675	0.0084825	0.0081245	0.008795	0.010422	0.008862	0.008996	0.009139	0.007826	0.008423	0.009167	0.008315	0.008832	0.011783	0.009383	0.008485	0.00884008	0.00894467	0.0093275			13	0.142084	0.131577	0.133618	0.124997	0.119722	0.129602	0.153578	0.13059	0.132564	0.134671	0.115323	0.12412	0.135084	0.122529	0.130147	0.173633	0.138267	0.125034	0.130267	0.00311976	0.131808	0.00521222	0.137449	0.00693616
13.25	0.00851	0.0080335	0.0084965	0.008535	0.0075105	0.007885	0.009152	0.007868	0.008199	0.008794	0.008276	0.006745	0.009025	0.007921	0.008293	0.010148	0.009326	0.008905	0.00816175	0.00817233	0.00893633			13.25	0.125402	0.118381	0.125204	0.125771	0.110674	0.116193	0.134863	0.115942	0.12082	0.129587	0.121954	0.0993936	0.132991	0.116723	0.122205	0.14954	0.137427	0.131223	0.120271	0.00253785	0.120427	0.00502432	0.131685	0.00762802
13.5	0.00783	0.0075175	0.007889	0.008286	0.0072085	0.007344	0.008331	0.007329	0.007706	0.008072	0.0085	0.005917	0.008771	0.007066	0.006685	0.010056	0.007996	0.008127	0.00767917	0.0076425	0.00811683			13.5	0.115382	0.110777	0.116251	0.122102	0.106224	0.10822	0.122765	0.107999	0.113555	0.118948	0.125255	0.0871923	0.129249	0.104124	0.0985095	0.148184	0.117828	0.119759	0.113159	0.00239887	0.112619	0.00569034	0.119609	0.00471671
13.75	0.0074205	0.0075725	0.0080795	0.007391	0.005757	0.0065815	0.007507	0.007334	0.007811	0.008348	0.006434	0.00508	0.008083	0.007069	0.006309	0.009977	0.008302	0.007884	0.00713367	0.00708567	0.00793733			13.75	0.109348	0.111588	0.119059	0.108913	0.0848346	0.0969843	0.110622	0.108073	0.115102	0.123015	0.0948108	0.0748584	0.11911	0.104168	0.0929688	0.14702	0.122337	0.116178	0.105121	0.00498687	0.104414	0.00701886	0.116964	0.00729757
14	0.0078245	0.0072595	0.007748	0.0070115	0.0061705	0.007356	0.00857	0.007079	0.00744	0.008056	0.005967	0.006374	0.008338	0.007257	0.006654	0.009675	0.008209	0.008265	0.00722833	0.00724767	0.00806633			14	0.115301	0.106975	0.114174	0.103321	0.0909278	0.108397	0.126287	0.104315	0.109635	0.118712	0.0879291	0.0939266	0.122868	0.106938	0.0980527	0.14257	0.120967	0.121792	0.106516	0.00361832	0.106801	0.00593768	0.118865	0.00747656
14.25	0.0070935	0.006611	0.0072435	0.00668	0.006158	0.007305	0.007842	0.006345	0.006877	0.00761	0.00575	0.006566	0.008044	0.007862	0.006207	0.008695	0.007063	0.007623	0.0068485	0.00683167	0.00758233			14.25	0.104529	0.097419	0.106739	0.0984358	0.0907436	0.107646	0.115559	0.0934993	0.101339	0.11214	0.0847314	0.0967559	0.118536	0.115854	0.0914657	0.128129	0.10408	0.112332	0.100919	0.00267154	0.100671	0.00474155	0.111732	0.00623518
14.5	0.0071995	0.0065855	0.0069295	0.0073655	0.0063265	0.00621	0.008013	0.006386	0.006785	0.007074	0.007657	0.004996	0.007424	0.007187	0.005287	0.008588	0.006846	0.006996	0.00676942	0.0068185	0.00705467			14.5	0.106091	0.0970432	0.102112	0.108537	0.0932266	0.0915099	0.118079	0.0941034	0.0999831	0.104242	0.112833	0.0736205	0.109399	0.105907	0.0779087	0.126552	0.100882	0.103092	0.0997534	0.00283305	0.100477	0.00642598	0.103957	0.00516967
14.75	0.0073085	0.0061035	0.0062635	0.006608	0.0056145	0.0057355	0.008613	0.006004	0.006203	0.006324	0.006892	0.004337	0.007134	0.006318	0.004993	0.007488	0.006986	0.006162	0.00627225	0.0063955	0.0065135			14.75	0.107697	0.0899405	0.0922983	0.0973748	0.0827347	0.0845177	0.12692	0.0884743	0.0914068	0.0931898	0.10156	0.0639096	0.105126	0.0931014	0.0735763	0.110342	0.102945	0.0908026	0.0924272	0.00374326	0.0942434	0.00833444	0.0959823	0.00641006
15	0.00658	0.005918	0.006103	0.006463	0.0054335	0.0053235	0.00697	0.00619	0.005646	0.00656	0.006366	0.004501	0.006146	0.006093	0.004749	0.007026	0.006046	0.005623	0.00597017	0.00603883	0.00594717			15	0.0969622	0.087207	0.0899332	0.0952381	0.0800675	0.0784465	0.102709	0.0912152	0.0831989	0.0966675	0.0938087	0.0663263	0.0905668	0.0897858	0.0699808	0.103534	0.0890932	0.0828599	0.0879758	0.00311591	0.0889876	0.00523614	0.0876368	0.00540201
15.25	0.005582	0.0054905	0.005462	0.005982	0.005432	0.0050305	0.005437	0.005727	0.005254	0.00567	0.006294	0.00457	0.005491	0.005479	0.004903	0.006815	0.005571	0.006214	0.0054965	0.005492	0.0057455			15.25	0.0822558	0.0809074	0.0804875	0.0881501	0.0800454	0.0741289	0.0801191	0.0843925	0.0774224	0.0835525	0.0927477	0.067343	0.0809148	0.080738	0.0722501	0.100425	0.0820937	0.0915689	0.0809959	0.00183571	0.0809295	0.00344524	0.0846651	0.00448186
15.5	0.005304	0.0049475	0.004896	0.005223	0.0046575	0.004473	0.005663	0.004945	0.00495	0.004842	0.005604	0.003711	0.005235	0.004825	0.004495	0.006546	0.004889	0.005634	0.00491683	0.0049525	0.00527067			15.5	0.0781592	0.0729058	0.0721469	0.0769656	0.0686324	0.0659137	0.0834494	0.072869	0.0729427	0.0713512	0.08258	0.0546849	0.0771424	0.0711007	0.0662379	0.0964612	0.0720438	0.083022	0.0724539	0.00191992	0.0729795	0.00423928	0.077668	0.00402605
15.75	0.00522	0.0045325	0.0048045	0.004788	0.0040785	0.0042895	0.00588	0.00456	0.004505	0.005104	0.004472	0.003685	0.004894	0.004626	0.00379	0.005556	0.004741	0.00474	0.00461883	0.004701	0.0047245			15.75	0.0769214	0.0667904	0.0707986	0.0705555	0.0601004	0.0632096	0.0866471	0.0671957	0.0663852	0.075212	0.0658989	0.0543018	0.0721175	0.0681683	0.055849	0.0818726	0.0698629	0.0698481	0.0680626	0.00245456	0.0692734	0.00441704	0.0696197	0.00442544
16	0.0047995	0.0041215	0.0047245	0.0045915	0.0037565	0.00395	0.005639	0.00396	0.004283	0.005166	0.004017	0.003496	0.004404	0.004671	0.003609	0.005214	0.004229	0.004371	0.00432392	0.00442683	0.00441633			16	0.0707249	0.060734	0.0696197	0.0676599	0.0553554	0.0582068	0.0830957	0.0583541	0.0631138	0.0761256	0.0591941	0.0515167	0.0648969	0.0688314	0.0531818	0.076833	0.0623181	0.0644106	0.0637168	0.0026374	0.0652334	0.00487901	0.0650786	0.00340696
16.25	0.0040395	0.003891	0.0043165	0.004016	0.003593	0.003734	0.004572	0.003507	0.004275	0.004358	0.003674	0.003512	0.003956	0.004234	0.003376	0.004824	0.0041	0.003823	0.00393167	0.003983	0.00405217			16.25	0.0595257	0.0573374	0.0636075	0.0591794	0.0529461	0.0550238	0.0673725	0.0516788	0.062996	0.064219	0.0541397	0.0517525	0.0582952	0.0623918	0.0497484	0.071086	0.0604172	0.0563353	0.0579366	0.00152728	0.0586931	0.00284306	0.0597123	0.00317217
16.5	0.003806	0.003487	0.0037305	0.003697	0.0032095	0.0033755	0.004174	0.003438	0.003536	0.003925	0.003469	0.00295	0.003801	0.00369	0.003449	0.004408	0.00398	0.003748	0.00355092	0.003582	0.003846			16.5	0.0560848	0.0513841	0.0549723	0.0544786	0.0472949	0.049741	0.0615076	0.050662	0.0521061	0.0578384	0.0511188	0.0434709	0.0560111	0.0543755	0.0508241	0.0649558	0.0586489	0.0552301	0.0523259	0.00139818	0.052784	0.00255681	0.0566743	0.00288518
16.75	0.003259	0.003303	0.0036025	0.003403	0.002811	0.003197	0.003414	0.003104	0.003502	0.003703	0.003103	0.002519	0.003875	0.003224	0.002733	0.003801	0.003425	0.003554	0.00326258	0.00322417	0.00343533			16.75	0.0480243	0.0486727	0.0530861	0.0501463	0.0414226	0.0471107	0.0503083	0.0457402	0.0516051	0.054567	0.0457255	0.0371197	0.0571016	0.0475085	0.0402732	0.0560111	0.0504704	0.0523714	0.0480771	0.00158056	0.047511	0.00250783	0.0506227	0.00195378
17	0.0030175	0.00305	0.0031675	0.002805	0.0022715	0.0025665	0.003077	0.002958	0.003142	0.003193	0.002417	0.002126	0.003007	0.002933	0.002319	0.003191	0.003032	0.003216	0.002813	0.00281883	0.00294967			17	0.0444656	0.0449445	0.046676	0.0413342	0.0334726	0.0378197	0.0453424	0.0435888	0.0463002	0.0470517	0.0356167	0.0313285	0.0443108	0.0432204	0.0341725	0.0470222	0.0446792	0.0473906	0.0414521	0.00204489	0.041538	0.00265238	0.043466	0.00252258
17.25	0.0027765	0.0026725	0.002667	0.002516	0.0021195	0.0022175	0.002917	0.002636	0.002709	0.002625	0.002407	0.001832	0.002603	0.002671	0.002154	0.003318	0.002713	0.00251	0.00249483	0.002521	0.0026615			17.25	0.0409142	0.0393817	0.0393006	0.0370755	0.0312327	0.0326768	0.0429846	0.0388438	0.0399195	0.0386817	0.0354693	0.0269962	0.0383575	0.0393596	0.0317411	0.0488937	0.0399785	0.0369871	0.0367636	0.0016115	0.0371492	0.00225724	0.0392196	0.001972
17.5	0.002672	0.0024145	0.0023845	0.002272	0.0019445	0.0020865	0.003031	0.002313	0.002516	0.002253	0.002291	0.001598	0.002575	0.002395	0.00194	0.002979	0.002378	0.002096	0.00229567	0.00233367	0.00239383			17.5	0.0393743	0.0355798	0.0351377	0.03348	0.0286539	0.0307464	0.0446645	0.0340841	0.0370755	0.0332	0.0337599	0.023548	0.0379449	0.0352925	0.0285876	0.0438982	0.035042	0.0308864	0.0338287	0.00154848	0.0343887	0.00278229	0.0352753	0.00227917
17.75	0.0024465	0.002105	0.002151	0.0019555	0.001699	0.001964	0.002827	0.002066	0.002144	0.002158	0.001753	0.001645	0.002283	0.002076	0.001643	0.002533	0.002217	0.002105	0.0020535	0.00209883	0.00214283			17.75	0.0360514	0.0310191	0.0316969	0.028816	0.0250363	0.0289413	0.0416584	0.0304444	0.0315938	0.0318001	0.025832	0.0242405	0.0336421	0.0305917	0.0242111	0.037326	0.0326695	0.0310191	0.0302602	0.00149769	0.0309282	0.00249846	0.0315766	0.00220245
18	0.0020565	0.0017815	0.001924	0.001756	0.0014565	0.0016965	0.002368	0.001745	0.001818	0.00203	0.001482	0.001431	0.001962	0.001748	0.001516	0.002095	0.002024	0.001893	0.0017785	0.00181233	0.001873			18	0.0303044	0.026252	0.0283519	0.0258762	0.0214628	0.0249994	0.0348946	0.0257141	0.0267899	0.0299139	0.0218386	0.0210871	0.0289118	0.0257583	0.0223396	0.0308717	0.0298255	0.0278951	0.0262078	0.00123106	0.0267064	0.00211028	0.0276003	0.00177058
18.25	0.0016615	0.0015925	0.001731	0.001535	0.001277	0.0014735	0.001835	0.001488	0.001697	0.001765	0.001305	0.001249	0.001698	0.001528	0.001359	0.001895	0.001676	0.001583	0.00154508	0.0015565	0.00162317			18.25	0.0244837	0.0234669	0.0255078	0.0226196	0.0188177	0.0217133	0.0270404	0.021927	0.0250068	0.0260089	0.0192303	0.0184051	0.0250216	0.0225164	0.0200261	0.0279245	0.0246974	0.0233269	0.0227682	0.000960515	0.0229364	0.00148161	0.0239188	0.00127185
18.5	0.0014375	0.0013885	0.0014495	0.001308	0.001076	0.001271	0.001548	0.001327	0.00145	0.001449	0.001167	0.000985	0.001557	0.001273	0.001118	0.001678	0.001353	0.001321	0.00132175	0.001321	0.00138333			18.5	0.0211829	0.0204608	0.0213597	0.0192746	0.0158558	0.0187293	0.0228112	0.0195545	0.021367	0.0213523	0.0171968	0.0145149	0.0229438	0.0187588	0.0164747	0.0247268	0.0199377	0.0194661	0.0194772	0.000839349	0.0194661	0.00126535	0.0203847	0.00108533
18.75	0.0012885	0.0012195	0.0012615	0.001135	0.0010405	0.0012145	0.001438	0.001139	0.0013	0.001223	0.001047	0.001034	0.001395	0.001151	0.000951	0.001428	0.001129	0.001303	0.00119325	0.00119683	0.00122617			18.75	0.0189872	0.0179704	0.0185893	0.0167252	0.0153327	0.0178967	0.0211902	0.0167842	0.0191567	0.018022	0.0154285	0.0152369	0.0205566	0.016961	0.0140138	0.0210429	0.0166368	0.0192009	0.0175836	0.000548714	0.0176364	0.000938939	0.0180687	0.00121625
19	0.001129	0.0010045	0.0010865	0.0010905	0.000963	0.001015	0.001299	0.000959	0.00105	0.001123	0.001058	0.000868	0.001162	0.000989	0.00093	0.001236	0.001063	0.001074	0.00104808	0.0010595	0.00107567			19	0.0166368	0.0148022	0.0160106	0.0160695	0.0141907	0.0149569	0.0191419	0.0141317	0.0154727	0.0165484	0.0155906	0.0127908	0.0171231	0.0145738	0.0137044	0.0182136	0.0156643	0.0158264	0.0154444	0.000381009	0.0156127	0.000885207	0.0158509	0.00109599
19.25	0.000862	0.0008925	0.000957	0.000927	0.0008015	0.0008335	0.00088	0.000844	0.000941	0.000973	0.000881	0.000722	0.000945	0.00081	0.000848	0.001073	0.00097	0.00091	0.000878917	0.0008735	0.000926			19.25	0.0127023	0.0131518	0.0141023	0.0136602	0.0118108	0.0122824	0.0129676	0.0124371	0.0138665	0.014338	0.0129823	0.0106393	0.0139254	0.0119361	0.012496	0.0158116	0.0142938	0.0134097	0.0129516	0.000350121	0.0128718	0.000527053	0.0136454	0.000670191
19.5	0.0007845	0.0007825	0.0008345	0.0008245	0.000716	0.0007215	0.000822	0.000747	0.000818	0.000851	0.000798	0.000634	0.000809	0.000687	0.000701	0.00092	0.000863	0.000803	0.00077725	0.000778333	0.000797167			19.5	0.0115603	0.0115308	0.0122971	0.0121497	0.0105509	0.0106319	0.0121129	0.0110077	0.012054	0.0125402	0.0117592	0.00934256	0.0119213	0.0101236	0.0103299	0.013557	0.0127171	0.0118329	0.0114535	0.000300192	0.0114694	0.000473397	0.011747	0.000562428
19.75	0.000699	0.000662	0.0006835	0.0007255	0.0006155	0.0005655	0.000745	0.000653	0.000671	0.000696	0.000755	0.000476	0.000655	0.000585	0.000585	0.000766	0.000653	0.00064	0.0006585	0.000666	0.000647333			19.75	0.0103004	0.00975516	0.010072	0.0106909	0.00906994	0.00833315	0.0109782	0.00962254	0.00988779	0.0102562	0.0111256	0.00701429	0.00965201	0.0086205	0.0086205	0.0112877	0.00962254	0.00943097	0.00970359	0.000353503	0.00981411	0.000609693	0.00953904	0.000544636
20	0.000626	0.00059	0.000566	0.000577	0.0004715	0.0004345	0.000656	0.000596	0.000584	0.000548	0.000606	0.000337	0.000532	0.000537	0.000514	0.000611	0.000561	0.000562	0.000544167	0.0005545	0.000552833			20	0.00922467	0.00869418	0.00834052	0.00850261	0.00694797	0.00640275	0.00966675	0.00878259	0.00860576	0.00807527	0.00892995	0.004966	0.0078395	0.00791318	0.00757425	0.00900363	0.00826684	0.00828157	0.00801878	0.000447442	0.00817105	0.000674723	0.00814649	0.000399026
	pre						1 hr post						4 hr post												pre						1 hr post						4 hr post
hM3Dq-CNO FFT	mouse 1	mouse 2	mouse 3	mouse 4	mouse 5	mouse 6	mouse 1	mouse 2	mouse 3	mouse 4	mouse 5	mouse 6	mouse 1	mouse 2	mouse 3	mouse 4	mouse 5	mouse 6						hM3Dq-CNO FFT	mouse 1	mouse 2	mouse 3	mouse 4	mouse 5	mouse 6	mouse 1	mouse 2	mouse 3	mouse 4	mouse 5	mouse 6	mouse 1	mouse 2	mouse 3	mouse 4	mouse 5	mouse 6
	S	S	S	S	S	S	S	S	S	S	S	S	S	S	S	S	S	S	average						S	S	S	S	S	S	S	S	S	S	S	S	S	S	S	S	S	S	average
Hz	uV^2	uV^2	uV^2	uV^2	uV^2	uV^2	uV^2	uV^2	uV^2	uV^2	uV^2	uV^2	uV^2	uV^2	uV^2	uV^2	uV^2	uV^2	pre	1 hr post	4 hr post			Hz	0.067808	0.0702325	0.074832	0.0626105	0.0719165	0.0682535	0.067808	0.0702325	0.074832	0.0626105	0.0719165	0.0682535	0.067808	0.0702325	0.074832	0.0626105	0.0719165	0.0682535	pre	sem	1 hr post	sem	4 hr post	sem
0	0.0008275	0.0008545	0.000879	0.0008585	0.0008665	0.00086875	0.001637	0.000652	0.000672	0.000434667	0.0017667	0.00117	0.001396	0.001168	0.000988	0.000919	0.000933	0.000798	0.000859125	0.00105539	0.00103367			0	0.012194	0.0125918	0.0129529	0.0126508	0.0127687	0.0128018	0.0241227	0.0096078	0.00990252	0.0064052	0.0260339	0.017241	0.0205713	0.0172115	0.0145591	0.0135423	0.0137486	0.0117592	0.01266	0.000106397	0.0155522	0.00335208	0.015232	0.00169692
0.25	0.0030175	0.003022	0.003089	0.003314	0.003205	0.0032015	0.006355	0.003085	0.002893	0.00205667	0.00621465	0.005648	0.004777	0.004098	0.003605	0.003873	0.00371	0.002982	0.0031415	0.00437539	0.00384083			0.25	0.0444656	0.0445319	0.0455192	0.0488348	0.0472285	0.047177	0.0936466	0.0454602	0.0426309	0.0303068	0.0915784	0.0832283	0.0703934	0.0603877	0.0531229	0.0570721	0.0546702	0.0439424	0.0462928	0.000710799	0.0644752	0.0114651	0.0565981	0.00129093
0.5	0.005765	0.0055145	0.0056525	0.00678	0.0065365	0.00621625	0.014625	0.006832	0.006723	0.00455467	0.012478	0.011038	0.015844	0.011258	0.009356	0.008888	0.008336	0.005407	0.00607746	0.00937512	0.00984817			0.5	0.0849524	0.0812611	0.0832947	0.0999094	0.0963212	0.091602	0.215512	0.100676	0.0990694	0.0671171	0.183875	0.162655	0.233476	0.165897	0.137869	0.130973	0.122838	0.079677	0.0895568	0.00308949	0.138151	0.0235609	0.145122	0.00356303
0.75	0.0098065	0.0093405	0.0091895	0.012158	0.012126	0.0106737	0.02623	0.013078	0.008902	0.00871867	0.021608	0.016096	0.036858	0.023054	0.018596	0.01555	0.016029	0.00823	0.010549	0.0157721	0.0197195			0.75	0.144508	0.137641	0.135416	0.179159	0.178687	0.157287	0.386523	0.192716	0.131179	0.128477	0.318413	0.237189	0.543136	0.339721	0.274029	0.229143	0.236202	0.121276	0.15545	0.00804936	0.232416	0.0423459	0.290584	0.021032
1	0.015033	0.014079	0.014784	0.016821	0.016246	0.0158025	0.036912	0.018143	0.013258	0.0120953	0.0345306	0.020504	0.044579	0.033288	0.02484	0.021242	0.025645	0.013768	0.0154609	0.0225738	0.027227			1	0.221525	0.207467	0.217855	0.247873	0.239399	0.232864	0.543931	0.267353	0.195369	0.178236	0.508839	0.302145	0.656912	0.490529	0.36604	0.31302	0.377902	0.202884	0.22783	0.00609592	0.332645	0.0641786	0.401214	0.0582719
1.25	0.0202825	0.019452	0.020344	0.0217805	0.0211415	0.0210623	0.045555	0.024572	0.02438	0.0163813	0.0450099	0.026768	0.053396	0.038253	0.029879	0.026373	0.029137	0.019267	0.0206771	0.0304444	0.0327175			1.25	0.298881	0.286643	0.299787	0.320955	0.311539	0.310371	0.671294	0.36209	0.359261	0.241394	0.663261	0.39445	0.786838	0.563692	0.440294	0.38863	0.42936	0.283917	0.304696	0.00492352	0.448625	0.0723427	0.482122	0.0638363
1.5	0.025724	0.024438	0.024798	0.0269875	0.025478	0.0258927	0.051469	0.028799	0.022454	0.0191993	0.0519441	0.03486	0.052098	0.042951	0.032836	0.031816	0.028063	0.02553	0.025553	0.0347876	0.035549			1.5	0.379066	0.360116	0.365421	0.397685	0.375441	0.381553	0.758442	0.424379	0.33088	0.282919	0.765443	0.513693	0.767711	0.632921	0.483868	0.468837	0.413533	0.376207	0.376547	0.00539512	0.512626	0.0852305	0.523846	0.0711958
1.75	0.030521	0.027583	0.028187	0.030843	0.0303225	0.029515	0.056272	0.029559	0.023599	0.019706	0.0593463	0.0512	0.05574	0.044386	0.034819	0.034431	0.028909	0.031816	0.0294953	0.039947	0.0383502			1.75	0.449754	0.40646	0.415361	0.454499	0.446829	0.43493	0.829218	0.435578	0.347752	0.290386	0.874521	0.754478	0.821379	0.654067	0.513089	0.507372	0.426	0.468837	0.434639	0.00803593	0.588656	0.106069	0.565124	0.0605414
2	0.032936	0.0324095	0.032984	0.035298	0.036385	0.034141	0.062613	0.033223	0.036161	0.0221487	0.0670449	0.059154	0.055717	0.043719	0.039209	0.037232	0.035112	0.032639	0.0340256	0.0467241	0.0406047			2	0.485341	0.477583	0.486049	0.520148	0.536166	0.503098	0.922659	0.489571	0.532865	0.32638	0.987967	0.871687	0.82104	0.644239	0.57778	0.548647	0.517407	0.480965	0.501397	0.00935198	0.688521	0.111504	0.598346	0.0600686
2.25	0.0360705	0.0384685	0.039143	0.0394285	0.0420075	0.0392857	0.065843	0.036506	0.052611	0.0243373	0.0767091	0.062702	0.076284	0.045047	0.040885	0.041256	0.037562	0.034152	0.0390673	0.0531181	0.0458643			2.25	0.531531	0.566868	0.576807	0.581014	0.619018	0.578911	0.970256	0.537949	0.77527	0.358632	1.13038	0.92397	1.12411	0.663808	0.602477	0.607944	0.55351	0.50326	0.575692	0.0114675	0.782742	0.117729	0.675852	0.0499737
2.5	0.0408685	0.0427825	0.043376	0.0435025	0.0478335	0.0434392	0.071158	0.040718	0.065019	0.0271453	0.0814184	0.065878	0.093973	0.050105	0.051554	0.054369	0.047798	0.041171	0.0436337	0.0585561	0.056495			2.5	0.602234	0.630438	0.639184	0.641048	0.704869	0.640116	1.04858	0.600016	0.958113	0.400011	1.19977	0.970771	1.38478	0.738342	0.759694	0.801176	0.704346	0.606692	0.642982	0.0137528	0.862877	0.122751	0.832504	0.0923461
2.75	0.0434205	0.0458555	0.0490615	0.0490995	0.0564215	0.0490805	0.085853	0.06564	0.087755	0.04376	0.0900452	0.076028	0.069529	0.053757	0.065267	0.064789	0.067959	0.047076	0.0488232	0.0748469	0.0613962			2.75	0.63984	0.675722	0.722965	0.723525	0.831421	0.723245	1.26512	0.967264	1.29315	0.644843	1.3269	1.12034	1.02457	0.792158	0.961768	0.954724	1.00144	0.693707	0.719453	0.0263507	1.10294	0.106646	0.904728	0.113662
3	0.047763	0.05377	0.0599765	0.0543115	0.0620225	0.057144	0.099659	0.077618	0.140887	0.0517453	0.104005	0.054956	0.060234	0.059612	0.066796	0.070175	0.065806	0.054603	0.0558312	0.0881451	0.062871			3	0.703831	0.792349	0.883807	0.800329	0.913957	0.842068	1.46856	1.14377	2.0761	0.762514	1.53261	0.809826	0.887602	0.878436	0.984299	1.03409	0.96971	0.804624	0.822723	0.0305443	1.2989	0.203176	0.926461	0.0537495
3.25	0.056715	0.0640695	0.070668	0.0626105	0.0719165	0.0666393	0.080326	0.080138	0.119422	0.0534253	0.121883	0.071088	0.059471	0.060768	0.058973	0.059331	0.048467	0.064123	0.0654365	0.0877137	0.0585222			3.25	0.835746	0.944121	1.04136	0.922622	1.05975	0.981989	1.18368	1.18091	1.75979	0.78727	1.79605	1.04755	0.876358	0.895471	0.86902	0.874295	0.714205	0.94491	0.964265	0.033681	1.29254	0.164467	0.862377	0.0343806
3.5	0.067808	0.0702325	0.074832	0.061675	0.0625685	0.0682535	0.051463	0.081557	0.090847	0.0543713	0.1309	0.076174	0.052723	0.075983	0.048076	0.050118	0.036353	0.077687	0.0675616	0.0808853	0.0568233			3.5	0.999212	1.03494	1.10272	0.908836	0.922003	1.00578	0.758353	1.20182	1.33871	0.80121	1.92892	1.12249	0.776921	1.11968	0.708443	0.738534	0.535694	1.14479	0.99558	0.0294859	1.19192	0.174191	0.837343	0.0317509
3.75	0.061745	0.0605775	0.065579	0.0540355	0.051689	0.0598072	0.039996	0.103284	0.095305	0.068856	0.124607	0.073072	0.04785	0.08502	0.036775	0.040456	0.028699	0.069592	0.0589055	0.0841867	0.0513987			3.75	0.909868	0.892664	0.966365	0.796262	0.761684	0.881313	0.589377	1.52198	1.4044	1.01465	1.8362	1.07678	0.705113	1.25285	0.541913	0.596155	0.422905	1.0255	0.868026	0.0309105	1.24057	0.179139	0.757405	0.0992063
4	0.050416	0.044867	0.049382	0.0437715	0.041137	0.0465768	0.034949	0.098419	0.063745	0.0656127	0.0990054	0.056634	0.042393	0.080478	0.032192	0.032049	0.027524	0.05909	0.046025	0.0697275	0.045621			4	0.742925	0.661155	0.727688	0.645012	0.606191	0.68635	0.515005	1.45029	0.93934	0.966861	1.45893	0.834553	0.624699	1.18592	0.474378	0.472271	0.405591	0.870744	0.67822	0.0210413	1.0275	0.150135	0.672266	0.129666
4.25	0.041377	0.03704	0.0408515	0.0393735	0.033559	0.0401125	0.030997	0.081152	0.056565	0.0541013	0.085256	0.04144	0.037136	0.042996	0.030544	0.028154	0.025214	0.046656	0.0387189	0.0582519	0.0351167			4.25	0.609727	0.545818	0.601983	0.580204	0.494522	0.591094	0.456769	1.19585	0.833536	0.797232	1.25632	0.610656	0.547232	0.633585	0.450093	0.414874	0.371551	0.687518	0.570558	0.0177295	0.858394	0.129004	0.517476	0.123257
4.5	0.0318855	0.0323355	0.0342105	0.031123	0.0284485	0.0326667	0.028671	0.04286	0.035822	0.0285733	0.0659665	0.036134	0.03472	0.033857	0.028737	0.026411	0.024183	0.033692	0.0317783	0.0396711	0.0302667			4.5	0.469861	0.476493	0.504122	0.458625	0.419214	0.481374	0.422493	0.63158	0.527869	0.421054	0.972076	0.532467	0.51163	0.498913	0.423465	0.38919	0.356358	0.496482	0.468282	0.0115855	0.58459	0.083926	0.446006	0.0515243
4.75	0.0281025	0.026091	0.028399	0.0264685	0.0262435	0.0274337	0.027506	0.034539	0.022655	0.023026	0.0572657	0.029787	0.034206	0.030545	0.026655	0.021663	0.022747	0.031454	0.027123	0.0324631	0.0278783			4.75	0.414116	0.384474	0.418485	0.390037	0.386721	0.404261	0.405326	0.508963	0.333842	0.339309	0.843861	0.438938	0.504056	0.450108	0.392785	0.319224	0.335197	0.463503	0.399682	0.0059864	0.478373	0.0778109	0.410812	0.0267248
5	0.026655	0.0248075	0.025754	0.0254315	0.0259515	0.0255927	0.026715	0.031774	0.028807	0.0211827	0.0526558	0.029644	0.028638	0.025595	0.025531	0.020119	0.022335	0.0282	0.0256987	0.0317964	0.0250697			5	0.392785	0.365561	0.379508	0.374756	0.382419	0.377132	0.393669	0.468218	0.424497	0.312146	0.775931	0.436831	0.422007	0.377165	0.376222	0.296471	0.329126	0.415552	0.378693	0.00366757	0.468549	0.0651919	0.369424	0.0302467
5.25	0.024912	0.024726	0.0263665	0.0248365	0.0230975	0.0256015	0.026393	0.030184	0.0343	0.0201227	0.0508501	0.03056	0.026378	0.022308	0.02435	0.020852	0.02056	0.027028	0.0249233	0.0320683	0.0235793			5.25	0.367101	0.36436	0.388534	0.365988	0.340362	0.377261	0.388925	0.444788	0.505441	0.296526	0.749323	0.450329	0.388703	0.328728	0.358819	0.307273	0.30297	0.398282	0.367268	0.00654762	0.472555	0.0624305	0.347463	0.019954
5.5	0.021716	0.021056	0.023623	0.0237805	0.0234975	0.0237018	0.023295	0.030203	0.026693	0.0201353	0.0465757	0.027294	0.021623	0.02069	0.023336	0.019412	0.019163	0.024681	0.0228958	0.0290327	0.0214842			5.5	0.320005	0.310279	0.348106	0.350427	0.346257	0.349267	0.343273	0.445068	0.393345	0.296712	0.686335	0.402202	0.318634	0.304886	0.343877	0.286053	0.282384	0.363697	0.33739	0.00716873	0.427823	0.0557704	0.316588	0.0166915
5.75	0.0215735	0.0206815	0.022824	0.024723	0.022961	0.0237735	0.022583	0.027784	0.02209	0.0185227	0.0461526	0.024981	0.018809	0.020871	0.021785	0.020095	0.018529	0.023764	0.0227561	0.0270189	0.0206422			5.75	0.317905	0.30476	0.336332	0.364316	0.338351	0.350324	0.332781	0.409422	0.325516	0.272948	0.6801	0.368117	0.277167	0.307553	0.321021	0.296118	0.273041	0.350184	0.335331	0.00878112	0.398147	0.0593715	0.304181	0.0131749
6	0.021906	0.0198035	0.021782	0.023447	0.0222625	0.0226145	0.021203	0.03184	0.022283	0.0212267	0.0463437	0.020931	0.018695	0.020005	0.020872	0.0197	0.017998	0.024003	0.0219692	0.0273046	0.0202122			6	0.322805	0.291822	0.320977	0.345513	0.328058	0.333245	0.312445	0.469191	0.32836	0.312794	0.682916	0.308437	0.275488	0.294792	0.307568	0.290297	0.265217	0.353706	0.323737	0.00732639	0.402357	0.0615311	0.297844	0.0117978
6.25	0.0204235	0.020147	0.021968	0.0229045	0.021793	0.0224363	0.019666	0.033246	0.030756	0.022164	0.0453531	0.018138	0.020294	0.019192	0.020075	0.017777	0.017498	0.021231	0.021612	0.0282205	0.0193445			6.25	0.300959	0.296884	0.323718	0.337518	0.321139	0.330618	0.289796	0.48991	0.453217	0.326606	0.668319	0.26728	0.29905	0.282811	0.295823	0.26196	0.257849	0.312858	0.318473	0.00662744	0.415855	0.0623294	0.285059	0.0127092
6.5	0.0192905	0.0191165	0.0207585	0.0227555	0.021108	0.021757	0.019645	0.028068	0.026095	0.018712	0.0438321	0.022067	0.019405	0.017936	0.017731	0.018843	0.016548	0.019387	0.0207977	0.0264032	0.0183083			6.5	0.284263	0.281699	0.305895	0.335323	0.311045	0.320609	0.289487	0.413607	0.384533	0.275738	0.645905	0.325177	0.28595	0.264303	0.261282	0.277668	0.24385	0.285685	0.306472	0.00848611	0.389075	0.0558063	0.26979	0.00887583
6.75	0.019703	0.018577	0.02001	0.022005	0.0219955	0.0210075	0.018024	0.02483	0.018001	0.0165533	0.0443274	0.022295	0.018005	0.016112	0.015779	0.01809	0.01491	0.01954	0.0205497	0.0240051	0.0170727			6.75	0.290341	0.273749	0.294865	0.324263	0.324123	0.309564	0.2656	0.365892	0.265261	0.243928	0.653204	0.328537	0.26532	0.237425	0.232518	0.266572	0.219712	0.287939	0.302818	0.00821233	0.353737	0.0627475	0.251581	0.00671133
7	0.019927	0.018766	0.019734	0.020184	0.019838	0.019959	0.016736	0.023423	0.014198	0.0156153	0.0421415	0.019045	0.015086	0.016359	0.017798	0.016176	0.016087	0.020179	0.0197347	0.0218598	0.0169475			7	0.293642	0.276534	0.290798	0.297429	0.292331	0.294114	0.24662	0.345159	0.20922	0.230106	0.620992	0.280645	0.222306	0.241065	0.262269	0.238368	0.237056	0.297356	0.290808	0.00299373	0.322124	0.062846	0.249737	0.0105117
7.25	0.020461	0.018084	0.01857	0.0195775	0.0184365	0.0190738	0.015328	0.023636	0.022054	0.0157573	0.0397839	0.021013	0.014549	0.015405	0.016674	0.016833	0.016416	0.021492	0.0190338	0.0229287	0.0168948			7.25	0.301511	0.266484	0.273646	0.288492	0.271678	0.281069	0.225872	0.348298	0.324985	0.232198	0.586251	0.309645	0.214393	0.227006	0.245706	0.248049	0.241904	0.316704	0.28048	0.00525013	0.337875	0.0536888	0.248961	0.0108664
7.5	0.0197735	0.0179715	0.018587	0.019647	0.018704	0.019117	0.014759	0.02152	0.026116	0.0143467	0.0410787	0.020283	0.014719	0.015254	0.014795	0.014893	0.017076	0.019712	0.0189667	0.0230172	0.0160748			7.5	0.29138	0.264826	0.273896	0.289516	0.27562	0.281706	0.217487	0.317116	0.384843	0.211411	0.605331	0.298888	0.216898	0.224781	0.218018	0.219462	0.25163	0.290474	0.279491	0.00411545	0.339179	0.0594884	0.236877	0.0145227
7.75	0.0189315	0.0170345	0.018629	0.0201995	0.019547	0.0194143	0.015192	0.014933	0.023171	0.00995533	0.0419699	0.018399	0.014794	0.015837	0.014033	0.01427	0.015717	0.019529	0.0189593	0.0206034	0.0156967			7.75	0.278973	0.251019	0.274515	0.297658	0.288043	0.286086	0.223868	0.220051	0.341445	0.146701	0.618463	0.271126	0.218003	0.233372	0.206789	0.210281	0.231604	0.287777	0.279382	0.00653782	0.303609	0.0682107	0.231304	0.0119649
8	0.0191875	0.0170895	0.017364	0.0189725	0.0172225	0.0181682	0.013895	0.016213	0.01655	0.0108087	0.0381576	0.015376	0.014091	0.013962	0.01344	0.01448	0.014606	0.019356	0.0180007	0.0185	0.0149892			8	0.282745	0.251829	0.255874	0.279577	0.253789	0.267725	0.204755	0.238913	0.243879	0.159275	0.562286	0.226579	0.207644	0.205743	0.19805	0.213376	0.215232	0.285228	0.265257	0.00552824	0.272615	0.059285	0.220879	0.0121291
8.25	0.017878	0.0161965	0.016148	0.017574	0.0171155	0.016861	0.013348	0.017651	0.014079	0.0117673	0.0343532	0.014601	0.014653	0.013552	0.014682	0.014025	0.01423	0.018042	0.0169622	0.0176332	0.014864			8.25	0.263448	0.23867	0.237955	0.258969	0.252212	0.248462	0.196695	0.260103	0.207467	0.173402	0.506224	0.215159	0.215925	0.199701	0.216352	0.206671	0.209692	0.265865	0.249953	0.00425044	0.259842	0.0506305	0.219034	0.0131078
8.5	0.0176465	0.0158795	0.016175	0.017971	0.018174	0.017073	0.012869	0.017466	0.012921	0.011644	0.0346339	0.013534	0.013151	0.013827	0.014723	0.01298	0.014169	0.018123	0.0171532	0.017178	0.0144955			8.5	0.260037	0.233999	0.238353	0.264819	0.26781	0.251586	0.189636	0.257377	0.190403	0.171585	0.510362	0.199436	0.193792	0.203753	0.216957	0.191272	0.208793	0.267059	0.252767	0.00573237	0.253133	0.0528158	0.213604	0.00970205
8.75	0.017358	0.0148805	0.015941	0.018071	0.0159685	0.017006	0.01153	0.015483	0.018071	0.010322	0.0368784	0.013328	0.013226	0.013232	0.013293	0.0133	0.013976	0.017925	0.0165375	0.0176021	0.0141587			8.75	0.255786	0.219277	0.234905	0.266292	0.23531	0.250599	0.169905	0.228156	0.266292	0.152104	0.543436	0.1964	0.194897	0.194985	0.195884	0.195987	0.205949	0.264141	0.243695	0.00694807	0.259382	0.0592146	0.208641	0.0113726
9	0.0157675	0.014147	0.015486	0.0166395	0.0145815	0.0160628	0.011653	0.013753	0.017038	0.00916867	0.0353789	0.012445	0.012373	0.01207	0.01242	0.013496	0.013307	0.01607	0.0154474	0.0165728	0.0132893			9	0.232348	0.208469	0.2282	0.245198	0.214871	0.236699	0.171717	0.202663	0.25107	0.135109	0.521339	0.183388	0.182327	0.177862	0.18302	0.198876	0.196091	0.236806	0.227631	0.00560774	0.244214	0.0575706	0.19583	0.0112335
9.25	0.0152235	0.0140135	0.0148775	0.0161165	0.01527	0.015497	0.012222	0.013118	0.016676	0.00874533	0.0331559	0.012641	0.012005	0.011518	0.013883	0.011564	0.012925	0.015172	0.0151663	0.016093	0.0128445			9.25	0.224332	0.206501	0.219233	0.237491	0.225017	0.228362	0.180102	0.193305	0.245736	0.12887	0.488581	0.186276	0.176904	0.169728	0.204578	0.170406	0.190461	0.223573	0.22349	0.00420134	0.237145	0.0525296	0.189275	0.00886497
9.5	0.01378	0.0125445	0.0144695	0.016469	0.0151665	0.0154693	0.011483	0.013093	0.018127	0.00872867	0.033969	0.01255	0.01086	0.011332	0.012419	0.010954	0.011975	0.01399	0.0146498	0.0163251	0.0119217			9.5	0.203061	0.184854	0.213221	0.242685	0.223492	0.227953	0.169212	0.192937	0.267118	0.128625	0.500564	0.184935	0.160032	0.166987	0.183005	0.161417	0.176462	0.206155	0.215878	0.00827895	0.240565	0.0551632	0.175676	0.00876188
9.75	0.013726	0.012363	0.014089	0.015646	0.0134515	0.0148675	0.010463	0.009175	0.016344	0.00611667	0.031865	0.012305	0.010974	0.011582	0.011299	0.011161	0.010681	0.014563	0.0140238	0.0143781	0.01171			9.75	0.202265	0.18218	0.207614	0.230558	0.19822	0.219086	0.154182	0.135202	0.240843	0.0901346	0.469559	0.181325	0.161712	0.170671	0.166501	0.164467	0.157394	0.214599	0.206654	0.00687083	0.211874	0.055438	0.172557	0.00708724
10	0.013563	0.012592	0.013718	0.0151275	0.013077	0.0144228	0.010072	0.012388	0.013693	0.00825867	0.0294314	0.011901	0.010021	0.010615	0.010461	0.010843	0.00991	0.014285	0.01375	0.0142907	0.0110225			10	0.199863	0.185554	0.202147	0.222917	0.192701	0.212532	0.14842	0.182548	0.201779	0.121699	0.433697	0.175372	0.147668	0.156422	0.154152	0.159781	0.146033	0.210502	0.202619	0.00550051	0.210586	0.0460608	0.162426	0.00860373
10.25	0.013113	0.011953	0.0129745	0.0139985	0.0127115	0.0134865	0.01062	0.01125	0.013743	0.0075	0.0278031	0.010782	0.010114	0.010375	0.010508	0.010262	0.010759	0.014011	0.0130395	0.0136163	0.0110048			10.25	0.193232	0.176138	0.191191	0.20628	0.187315	0.198736	0.156495	0.165779	0.202515	0.110519	0.409704	0.158882	0.149039	0.152885	0.154845	0.15122	0.158544	0.206465	0.192149	0.00418283	0.200649	0.0434897	0.162166	0.00984777
10.5	0.012726	0.0113265	0.01233	0.0130325	0.011866	0.0126812	0.010127	0.009974	0.012058	0.00664933	0.0268632	0.010925	0.010278	0.010404	0.010419	0.010044	0.011226	0.013683	0.012327	0.0127661	0.011009			10.5	0.187529	0.166906	0.181694	0.192046	0.174856	0.18687	0.14923	0.146976	0.177685	0.0979839	0.395853	0.16099	0.151456	0.153312	0.153533	0.148007	0.165425	0.201631	0.18165	0.00380094	0.18812	0.0429449	0.162227	0.008958
10.75	0.012492	0.0112975	0.0127505	0.013374	0.0123595	0.0130623	0.009213	0.012146	0.012099	0.00809733	0.0277817	0.01079	0.00934	0.009592	0.009856	0.009314	0.009641	0.013643	0.012556	0.0133545	0.010231			10.75	0.184081	0.166479	0.18789	0.197078	0.182128	0.192484	0.135762	0.178982	0.17829	0.119321	0.409388	0.159	0.137633	0.141347	0.145237	0.13725	0.142069	0.201042	0.185023	0.00432959	0.19679	0.0435932	0.150763	0.00823853
11	0.0123625	0.011031	0.012336	0.0126375	0.012039	0.0124867	0.009104	0.010629	0.013167	0.007086	0.0266994	0.010438	0.008745	0.009467	0.009643	0.009235	0.009292	0.013643	0.0121488	0.0128539	0.0100042			11	0.182173	0.162552	0.181782	0.186225	0.177405	0.184003	0.134156	0.156628	0.194028	0.104419	0.39344	0.153813	0.128865	0.139505	0.142098	0.136086	0.136926	0.201042	0.179023	0.00350297	0.189414	0.0425315	0.14742	0.0101287
11.25	0.012038	0.010817	0.0117485	0.0120025	0.011733	0.0118755	0.008781	0.009354	0.01414	0.006236	0.0252057	0.009583	0.008239	0.008785	0.009596	0.009652	0.008941	0.013013	0.0117024	0.0122166	0.00970433			11.25	0.177391	0.159398	0.173125	0.176868	0.172896	0.174996	0.129396	0.13784	0.208366	0.091893	0.371429	0.141214	0.121409	0.129455	0.141406	0.142231	0.131754	0.191758	0.172446	0.00271669	0.180023	0.0412533	0.143002	0.0108768
11.5	0.01095	0.009868	0.0112385	0.011529	0.0115005	0.0113838	0.008731	0.011135	0.013467	0.00742333	0.0252506	0.008474	0.007952	0.008479	0.008916	0.008803	0.008562	0.011692	0.0110783	0.0124135	0.00906733			11.5	0.161358	0.145414	0.165609	0.16989	0.16947	0.16775	0.128659	0.164084	0.198448	0.109389	0.372089	0.124872	0.11718	0.124946	0.131385	0.12972	0.126169	0.172292	0.163249	0.00378728	0.182924	0.0400423	0.133615	0.0102577
11.75	0.0103735	0.0104645	0.011692	0.011382	0.0102815	0.011537	0.009012	0.009867	0.008638	0.006578	0.0248898	0.009097	0.008362	0.007602	0.008611	0.008229	0.008734	0.010438	0.0109551	0.011347	0.00866267			11.75	0.152863	0.154204	0.172292	0.167724	0.151507	0.170008	0.1328	0.145399	0.127289	0.0969327	0.366774	0.134052	0.123222	0.112022	0.126891	0.121262	0.128703	0.153813	0.161433	0.00389555	0.167208	0.0404629	0.127652	0.00799329
12	0.0101315	0.0100635	0.0110285	0.011854	0.0107475	0.0114413	0.009421	0.010036	0.006608	0.00669067	0.0234429	0.009175	0.008073	0.007887	0.008364	0.007864	0.008385	0.010171	0.0108777	0.0108956	0.00845733			12	0.149297	0.148295	0.162515	0.174679	0.158374	0.168597	0.138827	0.147889	0.0973748	0.098593	0.345452	0.135202	0.118963	0.116222	0.123251	0.115883	0.12356	0.149879	0.160293	0.00427949	0.160556	0.0379883	0.124626	0.00574703
12.25	0.0098905	0.009294	0.0105735	0.011555	0.0105115	0.0110642	0.008753	0.011116	0.008583	0.00741067	0.0235989	0.008352	0.007514	0.007505	0.008104	0.007202	0.007843	0.010238	0.0104815	0.0113023	0.00806767			12.25	0.145745	0.136955	0.15581	0.170273	0.154896	0.163042	0.128983	0.163804	0.126478	0.109203	0.347751	0.123074	0.110726	0.110593	0.11942	0.106128	0.115574	0.150866	0.154454	0.00485823	0.166549	0.0369852	0.118884	0.0052277
12.5	0.0098265	0.0086325	0.010255	0.0108815	0.0095855	0.0105683	0.008807	0.010241	0.008732	0.00682733	0.024063	0.007679	0.007121	0.007341	0.008031	0.008145	0.007813	0.010558	0.00995821	0.0110582	0.00816817			12.5	0.144802	0.127208	0.151117	0.160349	0.141251	0.155733	0.129779	0.15091	0.128674	0.100607	0.35459	0.113157	0.104934	0.108176	0.118344	0.120024	0.115132	0.155582	0.146743	0.00483258	0.162953	0.0389495	0.120365	0.00666364
12.75	0.0093215	0.008819	0.0101745	0.0108985	0.009487	0.0105365	0.00791	0.008036	0.007925	0.00535733	0.0229613	0.008305	0.006867	0.006997	0.007699	0.008368	0.007299	0.009579	0.00987283	0.0100824	0.0078015			12.75	0.137361	0.129956	0.14993	0.160599	0.139799	0.155265	0.116561	0.118418	0.116782	0.0789451	0.338355	0.122382	0.101191	0.103107	0.113452	0.12331	0.107557	0.141155	0.145485	0.00477259	0.148574	0.0385123	0.114962	0.00743521
13	0.008741	0.0085735	0.0103075	0.010583	0.008934	0.0104452	0.007139	0.005782	0.007927	0.00385467	0.0229769	0.008423	0.006608	0.007249	0.007239	0.007814	0.007244	0.009167	0.00959738	0.00935042	0.0075535			13	0.128806	0.126338	0.15189	0.15595	0.13165	0.15392	0.1052	0.085203	0.116811	0.056802	0.338584	0.12412	0.0973748	0.106821	0.106673	0.115146	0.106747	0.135084	0.141426	0.00565392	0.137787	0.041365	0.111308	0.00617265
13.25	0.008473	0.008107	0.0092205	0.009737	0.0091155	0.00947875	0.006936	0.009155	0.006971	0.00610333	0.0197886	0.006745	0.006189	0.007441	0.007254	0.00741	0.007154	0.009025	0.00902196	0.00928316	0.00741217			13.25	0.124857	0.119464	0.135872	0.143483	0.134325	0.139678	0.102208	0.134907	0.102724	0.0899381	0.291603	0.0993936	0.0912005	0.10965	0.106894	0.109193	0.105421	0.132991	0.132947	0.0037149	0.136796	0.0315809	0.109225	0.00528074
13.5	0.0079185	0.0068755	0.0083705	0.009026	0.0080615	0.00869825	0.00711	0.010465	0.006736	0.00697667	0.0196092	0.005917	0.005676	0.006961	0.007689	0.006375	0.006386	0.008771	0.00815837	0.00946898	0.00697633			13.5	0.116686	0.101317	0.123347	0.133006	0.118793	0.128177	0.104772	0.154211	0.099261	0.102807	0.288959	0.0871923	0.0836409	0.102577	0.113304	0.0939413	0.0941034	0.129249	0.120221	0.00450344	0.139534	0.031338	0.102803	0.00550701
13.75	0.007576	0.006689	0.008143	0.0091395	0.008093	0.00864125	0.006083	0.007693	0.008081	0.00512867	0.0194552	0.00508	0.0051	0.00561	0.006681	0.006558	0.006192	0.008083	0.00804696	0.0085868	0.00637067			13.75	0.111639	0.0985684	0.119994	0.134679	0.119258	0.127337	0.0896385	0.113363	0.119081	0.0755755	0.286689	0.0748584	0.0751531	0.0826684	0.0984505	0.096638	0.0912447	0.11911	0.118579	0.00512167	0.126534	0.0329176	0.0938775	0.00666106
14	0.0077975	0.0069555	0.0081645	0.008942	0.008237	0.00855325	0.006097	0.005363	0.007676	0.00357533	0.0188663	0.006374	0.004955	0.005441	0.00561	0.005951	0.006122	0.008338	0.00810829	0.00799193	0.0060695			14	0.114903	0.102496	0.120311	0.131768	0.12138	0.12604	0.0898448	0.0790286	0.113113	0.0526857	0.278011	0.0939266	0.0730164	0.080178	0.0826684	0.0876933	0.0902132	0.122868	0.119483	0.00411402	0.117768	0.0330576	0.0894395	0.0061871
14.25	0.007953	0.0070345	0.007451	0.007879	0.007343	0.007665	0.006342	0.006644	0.006122	0.00442933	0.0169552	0.006566	0.004779	0.005644	0.005543	0.005245	0.005674	0.008044	0.00755425	0.0078431	0.0058215			14.25	0.117195	0.10366	0.109797	0.116104	0.108206	0.112951	0.0934551	0.0979053	0.0902132	0.0652702	0.249851	0.0967559	0.0704228	0.0831694	0.0816811	0.0772898	0.0836115	0.118536	0.111319	0.00208771	0.115575	0.0273005	0.085785	0.00712378
14.5	0.0073055	0.006237	0.0069375	0.007717	0.006921	0.00732725	0.005488	0.006005	0.006167	0.00400333	0.0167466	0.004996	0.004705	0.005062	0.005345	0.004784	0.005278	0.007424	0.00707421	0.00723432	0.005433			14.5	0.107653	0.0919078	0.10223	0.113717	0.101987	0.107974	0.0808706	0.0884891	0.0908763	0.0589927	0.246776	0.0736205	0.0693324	0.0745931	0.0787634	0.0704965	0.0777761	0.109399	0.104245	0.00303644	0.106604	0.0284258	0.0800601	0.00685364
14.75	0.006726	0.0056555	0.0062405	0.007237	0.006574	0.00673875	0.005108	0.005799	0.005728	0.003866	0.0146016	0.004337	0.004328	0.004594	0.004935	0.004866	0.004743	0.007134	0.00652863	0.00657327	0.0051			14.75	0.0991136	0.0833389	0.0919594	0.106644	0.0968738	0.0993015	0.075271	0.0854535	0.0844072	0.056969	0.215168	0.0639096	0.063777	0.0676967	0.0727216	0.0717049	0.0698924	0.105126	0.0962051	0.00321986	0.096863	0.0241005	0.0751531	0.00606663
15	0.0061195	0.005421	0.0058875	0.006536	0.0058345	0.00621175	0.00484	0.005965	0.006267	0.00397667	0.0137007	0.004501	0.00399	0.004199	0.00444	0.004153	0.004518	0.006146	0.00600171	0.00654173	0.00457433			15	0.0901763	0.0798833	0.0867576	0.0963138	0.0859766	0.0915357	0.0713217	0.0878996	0.0923499	0.0585997	0.201892	0.0663263	0.0587962	0.061876	0.0654274	0.0611982	0.0665768	0.0905668	0.0884405	0.00228554	0.0963982	0.0217405	0.0674069	0.00613422
15.25	0.005485	0.005191	0.005859	0.006193	0.0058925	0.006026	0.00444	0.005353	0.004481	0.00356867	0.0132892	0.00457	0.004179	0.00414	0.004159	0.003855	0.004389	0.005491	0.00577442	0.00595032	0.00436883			15.25	0.0808264	0.076494	0.0863376	0.0912594	0.0868313	0.0887985	0.0654274	0.0788813	0.0660315	0.0525875	0.195829	0.067343	0.0615813	0.0610066	0.0612866	0.0568069	0.0646758	0.0809148	0.0850912	0.00222465	0.0876833	0.0218956	0.0643787	0.00477588
15.5	0.00503	0.00466	0.0055205	0.0057175	0.0052615	0.005619	0.0043	0.005595	0.003717	0.00373	0.0127647	0.003711	0.004045	0.00381	0.004347	0.003974	0.003967	0.005235	0.00530142	0.00563628	0.00422967			15.5	0.0741216	0.0686693	0.0813495	0.0842525	0.0775329	0.082801	0.0633644	0.0824473	0.0547733	0.0549649	0.188099	0.0546849	0.0596067	0.0561438	0.0640569	0.0585605	0.0584573	0.0771424	0.0781211	0.00241935	0.0830557	0.0214602	0.0623279	0.00346228
15.75	0.00476	0.004208	0.004673	0.0051485	0.0047405	0.00491075	0.00393	0.004448	0.004689	0.00296533	0.0108342	0.003685	0.003533	0.003512	0.003855	0.003436	0.003676	0.004894	0.00474013	0.00509192	0.00381767			15.75	0.0701429	0.0620086	0.0688608	0.0758678	0.0698555	0.0723643	0.0579121	0.0655453	0.0690966	0.0436968	0.159652	0.0543018	0.0520619	0.0517525	0.0568069	0.0506325	0.0541692	0.0721175	0.06985	0.0018716	0.075034	0.0173113	0.0562567	0.00314793
16	0.0045375	0.00414	0.0044115	0.0047215	0.0043	0.0045665	0.003361	0.003687	0.004554	0.002458	0.0101673	0.003496	0.003478	0.003513	0.003421	0.003174	0.003046	0.004404	0.00444617	0.00462055	0.003506			16	0.0668641	0.0610066	0.0650074	0.0695755	0.0633644	0.0672915	0.0495273	0.0543312	0.0671073	0.0362208	0.149824	0.0515167	0.0512514	0.0517672	0.0504115	0.0467717	0.0448855	0.0648969	0.0655182	0.0012473	0.0680879	0.0168381	0.0516641	0.00329515
16.25	0.004095	0.003805	0.0041	0.004462	0.0039615	0.004281	0.0031	0.004049	0.004333	0.00269933	0.0094068	0.003512	0.002873	0.003116	0.002936	0.00305	0.002607	0.003956	0.00411742	0.00451669	0.00308967			16.25	0.0603435	0.0560701	0.0604172	0.0657516	0.0583763	0.0630844	0.0456813	0.0596656	0.0638506	0.0397771	0.138618	0.0517525	0.0423362	0.0459171	0.0432646	0.0449445	0.0384165	0.0582952	0.0606738	0.00139335	0.0665575	0.0148545	0.045529	0.00286787
16.5	0.0037455	0.0035695	0.0039285	0.004194	0.003864	0.00406125	0.00297	0.002954	0.003533	0.00196933	0.0085956	0.00295	0.002625	0.00269	0.002713	0.002965	0.002598	0.003801	0.00389379	0.00382866	0.00289867			16.5	0.0551933	0.0525998	0.05789	0.0618023	0.0569395	0.0598462	0.0437656	0.0435298	0.0520619	0.0290199	0.126664	0.0434709	0.0386817	0.0396396	0.0399785	0.0436919	0.0382839	0.0560111	0.0573785	0.00133822	0.0564187	0.0143735	0.0427145	0.00276512
16.75	0.0035495	0.0029785	0.003267	0.003613	0.0034895	0.00344	0.002774	0.001949	0.003017	0.00129933	0.00741195	0.002519	0.002305	0.002431	0.002362	0.002482	0.002396	0.003875	0.00338958	0.00316171	0.00264183			16.75	0.0523051	0.0438909	0.0481422	0.0532408	0.0514209	0.0506915	0.0408774	0.0287203	0.0444582	0.0191468	0.109222	0.0371197	0.0339662	0.035823	0.0348062	0.0365745	0.0353072	0.0571016	0.0499485	0.00140321	0.0465907	0.0130666	0.0389298	0.00277243
17	0.00297	0.002626	0.002755	0.0031115	0.003124	0.00293325	0.00233	0.002327	0.002598	0.00155133	0.00622245	0.002126	0.002096	0.002278	0.002094	0.002256	0.002271	0.003007	0.00291996	0.00285913	0.00233367			17	0.0437656	0.0386965	0.0405974	0.0458507	0.0460349	0.0432241	0.0343346	0.0342904	0.0382839	0.0228603	0.0916934	0.0313285	0.0308864	0.0335684	0.030857	0.0332442	0.0334652	0.0443108	0.0430282	0.0011869	0.0421319	0.010135	0.0343887	0.0036523
17.25	0.002637	0.0024125	0.002736	0.0030155	0.0026115	0.00287575	0.002065	0.002136	0.002394	0.001424	0.0064701	0.001832	0.002091	0.002238	0.001929	0.002065	0.002109	0.002603	0.00271471	0.00272018	0.0021725			17.25	0.0388586	0.0355503	0.0403174	0.0444361	0.0384828	0.0423768	0.0304296	0.0314759	0.0352777	0.0209839	0.0953427	0.0269962	0.0308128	0.0329789	0.0284255	0.0304296	0.031078	0.0383575	0.0400037	0.00127584	0.0400843	0.011225	0.0320137	0.00204958
17.5	0.002485	0.0021675	0.0024595	0.0026785	0.002237	0.002569	0.001895	0.002542	0.002142	0.00169467	0.00580905	0.001598	0.001778	0.001891	0.001877	0.001824	0.001813	0.002575	0.00243275	0.00261345	0.00195967			17.5	0.0366187	0.0319401	0.0362429	0.0394701	0.0329642	0.0378565	0.0279245	0.0374586	0.0315643	0.0249724	0.0856016	0.023548	0.0262004	0.0278656	0.0276593	0.0268783	0.0267162	0.0379449	0.0358488	0.00117604	0.0385116	0.00963698	0.0288774	0.00140093
17.75	0.0021795	0.0018595	0.002088	0.002375	0.002161	0.0022315	0.001768	0.00241	0.002011	0.00160667	0.00493935	0.001645	0.001437	0.001555	0.001566	0.001716	0.001571	0.002283	0.00214908	0.00239667	0.001688			17.75	0.0321169	0.0274014	0.0307686	0.0349978	0.0318443	0.0328832	0.0260531	0.0355135	0.0296339	0.0236757	0.0727857	0.0242405	0.0211755	0.0229143	0.0230764	0.0252868	0.0231501	0.0336421	0.0316687	0.00102971	0.0353171	0.0077034	0.0248742	0.00183086
18	0.001855	0.001632	0.0018055	0.0020595	0.0019585	0.0019325	0.001516	0.001614	0.001879	0.001076	0.00408525	0.001431	0.00119	0.00143	0.001324	0.001542	0.00142	0.001962	0.00187383	0.00193354	0.001478			18	0.0273351	0.024049	0.0266057	0.0303486	0.0288603	0.0284771	0.0223396	0.0237837	0.0276887	0.0158558	0.0601998	0.0210871	0.0175357	0.0210723	0.0195103	0.0227228	0.020925	0.0289118	0.0276126	0.000886565	0.0284925	0.00653339	0.0217797	0.00183277
18.25	0.001613	0.0014435	0.001627	0.0017855	0.0016295	0.00170625	0.001367	0.001924	0.001842	0.00128267	0.00369525	0.001249	0.001231	0.001224	0.001221	0.001278	0.001309	0.001698	0.00163412	0.00189332	0.00132683			18.25	0.023769	0.0212713	0.0239753	0.0263109	0.0240121	0.0251431	0.020144	0.0283519	0.0271435	0.0189012	0.0544528	0.0184051	0.0181399	0.0180367	0.0179925	0.0188325	0.0192893	0.0250216	0.0240803	0.000685775	0.0278998	0.00558902	0.0195521	0.0015932
18.5	0.001415	0.0011955	0.001398	0.0015155	0.001337	0.00145675	0.001228	0.001557	0.001339	0.001038	0.0032721	0.000985	0.00122	0.001117	0.001037	0.001076	0.001161	0.001557	0.00138629	0.00156985	0.00119467			18.5	0.0208513	0.0176168	0.0206008	0.0223323	0.0197019	0.0214665	0.0180957	0.0229438	0.0197314	0.0152959	0.0482173	0.0145149	0.0179778	0.01646	0.0152811	0.0158558	0.0171084	0.0229438	0.0204282	0.000666933	0.0231331	0.0051701	0.0176045	0.00111392
18.75	0.001273	0.001051	0.0011895	0.0012785	0.001216	0.001234	0.001069	0.001187	0.001186	0.000791333	0.0027846	0.001034	0.000991	0.000951	0.000985	0.000959	0.000971	0.001395	0.001207	0.00134199	0.001042			18.75	0.0187588	0.0154874	0.0175283	0.0188398	0.0179188	0.0181841	0.0157527	0.0174915	0.0174768	0.011661	0.0410336	0.0152369	0.0146033	0.0140138	0.0145149	0.0141317	0.0143086	0.0205566	0.0177862	0.000502755	0.0197754	0.00433987	0.0153548	0.00113518
19	0.0010755	0.0009595	0.001083	0.0011495	0.0010685	0.00111625	0.000915	0.001152	0.001116	0.000768	0.0024102	0.000868	0.00097	0.000827	0.000822	0.000825	0.000776	0.001162	0.00107538	0.00120487	0.000897			19	0.0158485	0.0141391	0.015959	0.0169389	0.0157453	0.0164489	0.0134833	0.0169758	0.0164453	0.0113172	0.0355165	0.0127908	0.0142938	0.0121866	0.0121129	0.0121571	0.0114351	0.0171231	0.0158466	0.000387059	0.0177548	0.00366119	0.0132181	0.00104431
19.25	0.0008775	0.000829	0.0009605	0.0010215	0.00094	0.000991	0.000794	0.001046	0.000892	0.000697333	0.00209235	0.000722	0.000828	0.000715	0.000749	0.000779	0.000668	0.000945	0.000936583	0.00104061	0.000780667			19.25	0.0129307	0.0122161	0.0141538	0.0150527	0.0138517	0.0146033	0.0117003	0.0154137	0.0131444	0.0102758	0.0308327	0.0106393	0.0122013	0.0105362	0.0110372	0.0114793	0.00984358	0.0139254	0.0138014	0.000432315	0.0153344	0.0031929	0.0115038	0.000875532
19.5	0.000748	0.000694	0.0008105	0.0008915	0.000833	0.000851	0.000688	0.000909	0.000672	0.000606	0.001794	0.000634	0.000681	0.000643	0.000646	0.000641	0.000597	0.000809	0.000804667	0.000883833	0.0006695			19.5	0.0110225	0.0102267	0.0119434	0.0131371	0.012275	0.0125402	0.0101383	0.0133949	0.00990252	0.00892995	0.0264362	0.00934256	0.0100351	0.00947518	0.00951939	0.00944571	0.00879733	0.0119213	0.0118575	0.000433661	0.0130241	0.00275929	0.00986568	0.000584858
19.75	0.00062	0.000585	0.0006755	0.0007095	0.0006465	0.0006925	0.000536	0.00069	0.000774	0.00046	0.0014937	0.000476	0.000473	0.000549	0.000514	0.000543	0.000509	0.000655	0.000654833	0.000738283	0.0005405			19.75	0.00913626	0.0086205	0.0099541	0.0104551	0.00952676	0.0102046	0.00789844	0.0101678	0.0114056	0.00677851	0.022011	0.00701429	0.00697008	0.00809001	0.00757425	0.00800159	0.00750057	0.00965201	0.00964956	0.000282092	0.0108793	0.00234761	0.00796475	0.000441385
20	0.0005345	0.0005255	0.0005625	0.000586	0.0005615	0.00057425	0.000447	0.000614	0.000534	0.000409333	0.00119145	0.000337	0.00039	0.000458	0.000407	0.000442	0.000463	0.000532	0.000557375	0.000588797	0.000448667			20	0.00787634	0.00774371	0.00828894	0.00863524	0.00827421	0.00846209	0.00658695	0.00904784	0.00786897	0.00603189	0.0175571	0.004966	0.005747	0.00674904	0.00599751	0.00651327	0.00682272	0.0078395	0.00821342	0.000139453	0.00867645	0.00186889	0.00661151	0.00037511

## Sheet: Fig 2g
																									relative power
	Delta Power (uV^2)		Clock Time															Clock Time
			17	18	19	20	21	22	23	24	1	2	3	4	5		Max Points	17	18	19	20	21	22	23	24	1	2	3	4	5		4 hr Avg
	hM3Dq-Saline	mouse 1	0.0358117	0.0341805	0.0349961	0.0358117	0.0309647	0.032593	0.0343202	0.0346635	0.0347445	0.0339355	0.0313665	0.0355007	0.032956		0.0358117	1	0.95445	0.977225	1	0.864652	0.91012	0.95835	0.967937	0.970199	0.94761	0.875873	0.991314	0.920258		0.933281
		mouse 2	0.036216	0.022465	0.0334021	0.0341805	0.037088	0.019587	0.028186	0.0297879	0.021357	0.039937	0.026419	0.020375	0.0230961		0.039937	0.906827	0.562511	0.836369	0.85586	0.928663	0.490447	0.705762	0.745872	0.534767	1	0.661517	0.510179	0.578314		0.745183
		mouse 3	0.0365282	0.034262	0.0332859	0.0326237	0.028912	0.028491	0.033516	0.0347445	0.031451	0.041023	0.031813	0.029422	0.0309444		0.041023	0.890431	0.83519	0.811396	0.795253	0.704775	0.694513	0.817005	0.846951	0.766667	1	0.775492	0.717207	0.754318		0.752887
		mouse 4	0.033085	0.031284	0.0324564	0.0339481	0.030541	0.036223	0.029154	0.0339355	0.031548	0.0291215	0.016582	0.039451	0.0293257		0.039451	0.838636	0.792984	0.822701	0.860513	0.77415	0.918177	0.738993	0.860194	0.799676	0.73817	0.420319	1	0.743346		0.822958
		mouse 5	0.0379305	0.03218	0.0317788	0.0309647	0.0332352	0.0328421	0.0322992	0.0313665	0.0300934	0.0359879	0.028556	0.0334142	0.0314906		0.0379305	1	0.848393	0.837816	0.816352	0.876213	0.865849	0.851536	0.826947	0.793382	0.948785	0.75285	0.880932	0.830219		0.852487
		mouse 6	0.0356205	0.030884	0.0336282	0.032593	0.0287577	0.0343811	0.030375	0.0355007	0.0307504	0.0317536	0.0198889	0.0358238	0.0286395		0.0358238	0.994327	0.862109	0.938713	0.909814	0.802754	0.959728	0.8479	0.990981	0.858381	0.886384	0.555187	1	0.799457		0.880049
	hM3Dq-CNO	mouse 1	0.0333196	0.035031	0.0325042	0.0459044	0.0443887	0.0475468	0.0430884	0.0464462	0.0421875	0.0336244	0.0328197	0.0300248	0.0353278			0.930411	0.978198	0.907642	1.28183	1.2395	1.32769	1.20319	1.29696	1.17804	0.938923	0.916452	0.838407	0.986488		1.26305
		mouse 2	0.0415124	0.0388256	0.0326391	0.0450187	0.0542252	0.0512243	0.038452	0.0430172	0.038462	0.033621	0.028422	0.031284	0.0273319			1.03945	0.972172	0.817265	1.12724	1.35777	1.28263	0.962816	1.07713	0.963067	0.841851	0.711671	0.783334	0.684375		1.18261
		mouse 3	0.036284	0.034884	0.0347693	0.0484837	0.0763217	0.0705322	0.050588	0.0340291	0.036574	0.038465	0.036584	0.029845	0.0245189			0.884479	0.850352	0.847556	1.18187	1.86046	1.71933	1.23316	0.829513	0.891549	0.937645	0.891792	0.727519	0.597687		1.49871
		mouse 4	0.033167	0.040272	0.033012	0.0300125	0.0698465	0.0625487	0.035815	0.0334547	0.035139	0.0226447	0.037299	0.0301788	0.0283517			0.840714	1.02081	0.836785	0.760753	1.77046	1.58548	0.907835	0.848008	0.8907	0.573996	0.945451	0.76497	0.718657		1.25613
		mouse 5	0.029355	0.035564	0.0338077	0.0668502	0.0681635	0.0622454	0.061671	0.0304093	0.021798	0.026542	0.037638	0.0354129	0.0256331			0.773915	0.937609	0.891306	1.76244	1.79706	1.64104	1.62589	0.801711	0.574682	0.699753	0.992288	0.933625	0.67579		1.70661
		mouse 6	0.027143	0.0370403	0.0338906	0.0435166	0.0598527	0.0594812	0.0510219	0.0349867	0.0163537	0.0178241	0.0372957	0.0303739	0.0225168			0.757681	1.03396	0.946038	1.21474	1.67075	1.66038	1.42425	0.976633	0.456504	0.497548	1.04109	0.847871	0.628545		1.49253
	hM3Dq-Saline		0.0358653	0.0308759	0.0332579	0.0333536	0.0315831	0.0306862	0.0313084	0.0333331	0.0299907	0.0352931	0.0257709	0.0323311	0.0294087		hM3Dq-Saline	0.93837	0.809273	0.870703	0.872965	0.825201	0.806472	0.819924	0.873147	0.787179	0.920158	0.67354	0.849939	0.770985		0.831141	0.0299219
	hM3Dq-CNO		0.0334635	0.0369361	0.0334372	0.046631	0.062133	0.0589297	0.0467727	0.0370572	0.0317524	0.0287869	0.0350097	0.0311866	0.02728		hM3Dq-CNO	0.871108	0.965517	0.874432	1.22148	1.616	1.53609	1.22619	0.971657	0.825756	0.748286	0.916457	0.815954	0.715257		1.38142	0.0814498
