# Supplementary material for: GABA neurons in the ventral tegmental area regulate non-rapid eye movement sleep in mice
Source: eLife. 2019 Jun 4;8:e44928. doi: 10.7554/eLife.44928 (PMC6548506; doi:10.7554/eLife.44928)
Supplement: Figure 3—source data 1. [file elife-44928-fig3-data1.xlsx]

## Sheet: All trials
		Time	-32	-28	-24	-20	-16	-12	-8	-4	0	4	8	12	16	20	24	28	32	36	40	44	48	52	56	60	64	68	72	76	80	84	88	92	96	100	104	108	112	116	120
ACR2	ave	W	0.433481	0.428041	0.426073	0.433291	0.432976	0.438457	0.452578	0.469339	0.701926	0.807195	0.803217	0.788403	0.754417	0.733121	0.715389	0.689799	0.679309	0.655614	0.641696	0.632955	0.622131	0.614768	0.609644	0.586934	0.578817	0.571568	0.562803	0.552192	0.539274	0.524941	0.519199	0.513899	0.500907	0.50495	0.497835	0.490367	0.486603	0.481145	0.483313
	sem	W	0.0275106	0.0252978	0.0224638	0.0238462	0.0201632	0.0209985	0.0170277	0.0233832	0.041269	0.0382519	0.0398327	0.0458806	0.0552005	0.0589673	0.0614872	0.06497	0.0671897	0.0758301	0.0696183	0.0691093	0.0698016	0.0690591	0.0691148	0.0552745	0.0522916	0.0548222	0.0479541	0.0485415	0.0455601	0.0432105	0.0413453	0.0398974	0.0394474	0.0381145	0.0362389	0.0316527	0.0308422	0.0306195	0.0361634
mCherry	ave	W	0.492651	0.484318	0.48116	0.481299	0.476927	0.472688	0.479077	0.487755	0.500663	0.505112	0.496707	0.487961	0.477133	0.49185	0.4897	0.487616	0.494005	0.502482	0.502621	0.509149	0.500815	0.49901	0.499144	0.510045	0.518374	0.527052	0.514485	0.512608	0.514552	0.510318	0.514485	0.501434	0.509906	0.509767	0.509834	0.505668	0.503445	0.505668	0.507473
	sem	W	0.0360378	0.0385935	0.035588	0.0385962	0.0374988	0.0390317	0.0381757	0.038987	0.0392987	0.0458878	0.0474593	0.0432125	0.040114	0.0389191	0.0412752	0.0409335	0.0414328	0.0477725	0.047997	0.0507591	0.0514927	0.0567508	0.0557042	0.061344	0.0569528	0.0604059	0.0623208	0.0658986	0.0628689	0.063475	0.0638685	0.0575559	0.059101	0.0562062	0.0561297	0.0562733	0.0541388	0.0569442	0.0515135
ACR2	ave	S	0.498706	0.500516	0.504061	0.486237	0.491919	0.490067	0.479419	0.4627	0.224905	0.122761	0.124886	0.139701	0.175423	0.196677	0.217997	0.243587	0.250331	0.273984	0.289796	0.298453	0.312865	0.321964	0.326972	0.347672	0.365114	0.375994	0.388388	0.400735	0.413356	0.425935	0.431719	0.43688	0.455353	0.45494	0.462139	0.473395	0.480747	0.486205	0.482144
	sem	S	0.0295162	0.0284644	0.0288836	0.0276678	0.0249491	0.0258176	0.0223169	0.0265057	0.0522224	0.0344087	0.0360333	0.0428898	0.0513442	0.0545852	0.0562715	0.0589294	0.0597645	0.0704522	0.0607659	0.0607566	0.0616333	0.0593681	0.059776	0.0490118	0.0492462	0.0520833	0.0433323	0.0436483	0.0406429	0.0396768	0.0336422	0.0331184	0.0300555	0.0321706	0.0289611	0.0224301	0.0198599	0.0216443	0.0286491
mCherry	ave	S	0.435598	0.443931	0.438642	0.436281	0.446904	0.453159	0.442603	0.438091	0.427195	0.427191	0.431223	0.442119	0.442464	0.429763	0.438302	0.440385	0.434068	0.427608	0.431635	0.425108	0.437746	0.437401	0.437334	0.424283	0.424422	0.41991	0.432478	0.436577	0.434633	0.436783	0.436783	0.449767	0.445529	0.447751	0.4456	0.449901	0.45004	0.445735	0.446013
	sem	S	0.0423276	0.0427269	0.0399325	0.0429571	0.04225	0.0427059	0.0403927	0.0430938	0.0450403	0.0466359	0.0495117	0.0455023	0.0428568	0.0421297	0.0418783	0.0420493	0.0421599	0.0431725	0.0433745	0.0460989	0.0434467	0.0485676	0.0481753	0.0539844	0.0519468	0.0559301	0.0572575	0.0592379	0.0568275	0.0568254	0.0576782	0.0517692	0.0531256	0.0516619	0.0515544	0.0512268	0.0491025	0.0505853	0.0453732
ACR2	ave	R	0.0678136	0.0714436	0.0698653	0.0804714	0.0751052	0.0714752	0.0680029	0.0679609	0.0731692	0.0700442	0.071896	0.071896	0.0701599	0.070202	0.0666141	0.0666141	0.0703598	0.0704019	0.068508	0.0685922	0.0650042	0.0632681	0.0633838	0.0653935	0.0560684	0.0524383	0.0488083	0.0470721	0.0473695	0.0491239	0.0490818	0.0492214	0.0437395	0.0401094	0.0400253	0.0362374	0.0326494	0.0326494	0.0345434
	sem	R	0.0167231	0.0179013	0.0177943	0.0151944	0.0158848	0.0145255	0.0162618	0.0151727	0.017785	0.0168469	0.0168744	0.0168744	0.0165101	0.0165488	0.0165082	0.0165082	0.0167254	0.017506	0.0169087	0.0188746	0.0184424	0.01757	0.0163052	0.0171613	0.0143056	0.0124899	0.010859	0.0112202	0.0151329	0.0141011	0.0131057	0.0154434	0.0153887	0.0137604	0.0123789	0.0119223	0.0129375	0.0119452	0.0121395
mCherry	ave	R	0.0717512	0.0717512	0.0801971	0.0824194	0.0761694	0.0741532	0.0783199	0.0741532	0.0721416	0.0676971	0.0720699	0.0699194	0.0804032	0.0783871	0.0719982	0.0719982	0.0719265	0.0699104	0.0657437	0.0657437	0.0614382	0.0635887	0.0635215	0.065672	0.0572043	0.0530376	0.0530376	0.0508154	0.0508154	0.0528987	0.0487321	0.0487993	0.0445654	0.0424821	0.0445654	0.044431	0.0465143	0.0485977	0.0465143
	sem	R	0.0218992	0.0200903	0.0198623	0.0165654	0.0153188	0.0129561	0.014295	0.0159582	0.0168883	0.0143401	0.0135771	0.0140387	0.0191264	0.0177438	0.0173977	0.0173977	0.0183417	0.0160194	0.0166904	0.0166904	0.016734	0.0179623	0.0152059	0.0164802	0.0126824	0.0137431	0.0137431	0.0146869	0.0146869	0.0152386	0.0144178	0.0152965	0.0136272	0.0130904	0.0119289	0.00770551	0.00846678	0.00904586	0.00846678

## Sheet: Sheet1
		Time	-32	-28	-24	-20	-16	-12	-8	-4	0	4	8	12	16	20	24	28	32	36	40	44	48	52	56	60	64	68	72	76	80	84	88	92	96	100	104	108	112	116	120
ACR2	ave	W	1	1	1	1	1	1	1	1	1	1	1	1	1	1	1	0.988319	0.988319	0.965255	0.978787	0.978787	0.965255	0.960981	0.947746	0.928208	0.928208	0.923306	0.913205	0.904302	0.895755	0.88512	0.8723	0.87287	0.869166	0.855931	0.864478	0.860204	0.846578	0.828239	0.819906
	sem	W	0	0	0	0	0	0	0	0	0	0	0	0	0	0	0	0.00777626	0.00777626	0.0131292	0.00723327	0.00723327	0.00833633	0.0107715	0.0109723	0.00847017	0.00847017	0.0113144	0.0175608	0.0189924	0.023343	0.0211346	0.0284757	0.0234445	0.0217667	0.0234953	0.0204042	0.0215851	0.0223536	0.016678	0.0148851
mCherry	ave	W	1	1	1	1	1	1	1	1	0.991122	0.975963	0.971963	0.966558	0.95421	0.95821	0.95421	0.95021	0.940457	0.935051	0.926356	0.916295	0.910235	0.910235	0.904174	0.908174	0.908174	0.912174	0.887256	0.87197	0.872848	0.872848	0.866787	0.843626	0.852504	0.848156	0.847808	0.842403	0.842403	0.847281	0.847281
	sem	W	0	0	0	0	0	0	0	0	0.00548081	0.00866171	0.00910779	0.0135088	0.0157731	0.0140132	0.0157731	0.018254	0.0209865	0.0245134	0.0260325	0.0234061	0.020561	0.020561	0.0192646	0.0184058	0.0184058	0.0183964	0.0143043	0.0138915	0.0100897	0.0100897	0.0109788	0.0106008	0.0118383	0.0110435	0.0151646	0.0189519	0.0189519	0.0202589	0.0202589
ACR2	ave	S	1	1	1	1	1	1	1	1	0.47046	0.279521	0.280909	0.292891	0.365785	0.400507	0.443138	0.475063	0.485579	0.502028	0.561004	0.572928	0.586439	0.601896	0.601717	0.624525	0.639689	0.648854	0.659218	0.664613	0.671237	0.690946	0.697701	0.701122	0.73609	0.719196	0.726178	0.73061	0.735986	0.735986	0.717523
	sem	S	0	0	0	0	0	0	0	0	0.0995979	0.0804808	0.0822131	0.0907635	0.110327	0.111565	0.114346	0.115318	0.116761	0.121961	0.112267	0.114318	0.117052	0.117266	0.116649	0.0915181	0.0894114	0.0946168	0.078197	0.0735975	0.0709339	0.0667794	0.0554941	0.0573434	0.0526994	0.0457537	0.0426498	0.0342087	0.0339724	0.0366481	0.0369563
mCherry	ave	S	1	1	1	1	1	1	1	1	0.961047	0.936951	0.917649	0.917855	0.892721	0.873768	0.882863	0.877863	0.845323	0.826435	0.81199	0.773101	0.796894	0.782243	0.768148	0.768845	0.761949	0.754194	0.754194	0.749543	0.742646	0.740401	0.733504	0.733504	0.740052	0.744703	0.735052	0.723156	0.716259	0.696815	0.690822
	sem	S	0	0	0	0	0	0	0	0	0.0198817	0.0267126	0.0377856	0.0348263	0.026099	0.028028	0.0284584	0.0384648	0.0363863	0.0392937	0.0462051	0.0718849	0.0663247	0.0758039	0.0732682	0.066121	0.0630807	0.0756974	0.0756974	0.0770536	0.0740128	0.070275	0.0684507	0.0684507	0.0666663	0.0660868	0.0642808	0.0598405	0.0582001	0.064008	0.0519145
ACR2	ave	R	1	1	1	1	1	1	1	1	0.91	0.656429	0.656429	0.656429	0.627857	0.627857	0.559286	0.559286	0.559286	0.559286	0.559286	0.519286	0.479286	0.479286	0.454286	0.425714	0.294048	0.235714	0.235714	0.235714	0.210714	0.210714	0.210714	0.210714	0.185714	0.185714	0.185714	0.0904762	0.0904762	0.0904762	0.0904762
	sem	R	0	0	0	0	0	0	0	0	0.0556776	0.174761	0.174761	0.174761	0.168791	0.168791	0.16018	0.16018	0.16018	0.16018	0.16018	0.162614	0.174439	0.174439	0.170976	0.16845	0.129696	0.104491	0.104491	0.104491	0.106606	0.106606	0.106606	0.106606	0.114286	0.114286	0.114286	0.0585153	0.0585153	0.0585153	0.0585153
mCherry	ave	R	1	1	1	1	1	1	1	1	0.86	0.743333	0.743333	0.643333	0.643333	0.586667	0.48	0.48	0.48	0.446667	0.39	0.39	0.39	0.373333	0.373333	0.373333	0.373333	0.333333	0.316667	0.316667	0.316667	0.316667	0.283333	0.0833333	0.0833333	0.0333333	0.0333333	0.0333333	0.0333333	0.0333333	0.0166667
	sem	R	0	0	0	0	0	0	0	0	0.0979796	0.104297	0.104297	0.181781	0.181781	0.170815	0.177904	0.177904	0.177904	0.16811	0.172047	0.172047	0.172047	0.17018	0.17018	0.17018	0.17018	0.184466	0.183333	0.183333	0.183333	0.183333	0.185592	0.0527046	0.0527046	0.0333333	0.0333333	0.0333333	0.0333333	0.0333333	0.0166667
