# Supplementary material for: GABA neurons in the ventral tegmental area regulate non-rapid eye movement sleep in mice
Source: eLife. 2019 Jun 4;8:e44928. doi: 10.7554/eLife.44928 (PMC6548506; doi:10.7554/eLife.44928)
Supplement: Figure 4—source data 1. [file elife-44928-fig4-data1.xlsx]

## Sheet: Sheet1
			-200	-196	-192	-188	-184	-180	-176	-172	-168	-164	-160	-156	-152	-148	-144	-140	-136	-132	-128	-124	-120	-116	-112	-108	-104	-100	-96	-92	-88	-84	-80	-76	-72	-68	-64	-60	-56	-52	-48	-44	-40	-36	-32	-28	-24	-20	-16
		mouse1	W	W	S	S	S	S	S	S	S	S	S	S	S	S	S	S	S	S	S	S	S	S	S	S	S	S	S	S	S	S	S	S	S	S	S	S	S	S	S	S	S	S	S	S	S	S	S
		mouse2	S	S	S	S	S	S	S	S	S	S	S	S	S	S	S	S	S	S	S	S	S	S	S	S	S	S	S	S	S	S	S	S	S	S	S	S	S	S	S	S	S	S	S	S	S	S	S
		mouse3	S	S	S	S	S	S	S	S	S	S	S	S	S	S	S	S	S	S	S	S	S	S	S	S	S	S	S	S	S	S	S	S	S	S	S	S	S	S	S	S	S	S	S	S	S	S	S
		mouse4	S	S	S	S	S	S	S	S	S	S	S	S	S	S	S	S	S	S	S	S	S	S	S	S	S	S	S	S	S	S	S	S	S	S	S	S	S	S	S	S	S	S	S	S	S	S	S
		mouse5	S	S	S	S	S	S	S	S	S	S	S	S	S	S	S	S	S	S	S	S	S	S	S	S	S	S	S	S	S	S	S	S	S	S	S	S	S	S	S	S	S	S	S	S	S	S	S
		mouse6	S	S	S	S	S	S	S	S	S	S	S	S	S	S	S	S	S	S	S	S	S	S	S	S	S	S	S	S	S	S	S	S	S	S	S	S	S	S	S	S	S	S	S	S	S	S	S
		mouse7
		mouse8
		mouse9
		mouse10
		mouse11
		mouse12
			Number in 10 Epoch												probabiliy in 10 Epoch
			0	40	80	120	160	200							0	40	80	120	160	200
		W	-200	-160	-120	-80	-40	0	40	80	120	160	200	W	-200	-160	-120	-80	-40	0	40	80	120	160	200
		mouse1	2	0	0	0	0	1	10	9	0	0	0	mouse1	0.2	0	0	0	0	0.1	1	0.9	0	0	0
		mouse2	0	0	0	0	0	1	10	6	0	0	0	mouse2	0	0	0	0	0	0.1	1	0.6	0	0	0
		mouse3	0	0	0	0	0	1	10	10	5	0	0	mouse3	0	0	0	0	0	0.1	1	1	0.5	0	0
		mouse4	0	0	0	0	0	1	4	0	0	0	0	mouse4	0	0	0	0	0	0.1	0.4	0	0	0	0
		mouse5	0	0	0	0	0	1	6	0	0	0	0	mouse5	0	0	0	0	0	0.1	0.6	0	0	0	0
		mouse6	0	0	0	0	0	1	5	0	0	0	0	mouse6	0	0	0	0	0	0.1	0.5	0	0	0	0
		mouse7												mouse7
		mouse8												mouse8
		mouse9												mouse9
		mouse10												mouse10
		mouse11												mouse11
		mouse12												mouse12
			0	40	80	120	160	200							0	40	80	120	160	200
		S	-200	-160	-120	-80	-40	0	40	80	120	160	200	S	-200	-160	-120	-80	-40	0	40	80	120	160	200
		mouse1	8	10	10	10	10	0	0	1	10	10	10	mouse1	0.8	1	1	1	1	0	0	0.1	1	1	1
		mouse2	10	10	10	10	10	0	0	4	10	10	10	mouse2	1	1	1	1	1	0	0	0.4	1	1	1
		mouse3	10	10	10	10	10	0	0	0	5	10	10	mouse3	1	1	1	1	1	0	0	0	0.5	1	1
		mouse4	10	10	10	10	10	0	6	10	10	10	10	mouse4	1	1	1	1	1	0	0.6	1	1	1	1
		mouse5	10	10	10	10	10	0	4	10	10	10	10	mouse5	1	1	1	1	1	0	0.4	1	1	1	1
		mouse6	10	10	10	10	10	0	5	10	10	1	0	mouse6	1	1	1	1	1	0	0.5	1	1	0.1	0
		mouse7												mouse7
		mouse8												mouse8
		mouse9												mouse9
		mouse10												mouse10
		mouse11												mouse11
		mouse12												mouse12
			0	40	80	120	160	200							0	40	80	120	160	200
		R	-200	-160	-120	-80	-40	0	40	80	120	160	200	W	-200	-160	-120	-80	-40	0	40	80	120	160	200
		mouse1	0	0	0	0	0	0	0	0	0	0	0	mouse1	0	0	0	0	0	0	0	0	0	0	0
		mouse2	0	0	0	0	0	0	0	0	0	0	0	mouse2	0	0	0	0	0	0	0	0	0	0	0
		mouse3	0	0	0	0	0	0	0	0	0	0	0	mouse3	0	0	0	0	0	0	0	0	0	0	0
		mouse4	0	0	0	0	0	0	0	0	0	0	0	mouse4	0	0	0	0	0	0	0	0	0	0	0
		mouse5	0	0	0	0	0	0	0	0	0	0	0	mouse5	0	0	0	0	0	0	0	0	0	0	0
		mouse6	0	0	0	0	0	0	0	0	0	9	10	mouse6	0	0	0	0	0	0	0	0	0	0.9	1
		mouse7												mouse7
		mouse8												mouse8
		mouse9												mouse9
		mouse10												mouse10
		mouse11												mouse11
		mouse12												mouse12
		SUM and AVE
			0	40	80	120	160	200
			-200	-160	-120	-80	-40	0	40	80	120	160	200
		W	2	0	0	0	0	6	45	25	5	0	0
		S	58	60	60	60	60	0	15	35	55	51	50
		R	0	0	0	0	0	0	0	0	0	9	10
		SUM	60	60	60	60	60	6	60	60	60	60	60
	Prob	W	0.0333333	0	0	0	0	1	0.75	0.416667	0.0833333	0	0
		S	0.966667	1	1	1	1	0	0.25	0.583333	0.916667	0.85	0.833333
		R	0	0	0	0	0	0	0	0	0	0.15	0.166667
	Count		6	6	6	6	6	6	6	6	6	6	6
	SEM	W	0.0333333	0	0	0	0	6.20634e-18	0.114746	0.193936	0.0833333	0	0
		S	0.0333333	0	0	0	0	0	0.114746	0.193936	0.0833333	0.15	0.166667
		R	0	0	0	0	0	0	0	0	0	0.15	0.166667
[truncated: 54 more columns]
