# Supplementary material for: GABA neurons in the ventral tegmental area regulate non-rapid eye movement sleep in mice
Source: eLife. 2019 Jun 4;8:e44928. doi: 10.7554/eLife.44928 (PMC6548506; doi:10.7554/eLife.44928)
Supplement: Figure 5—figure supplement 1—source data 1. [file elife-44928-fig5-figsupp1-data1.xlsx]

## Sheet: Firing Probability
			max
			50	100	250	500
		File	10 Hz	20 Hz	50 HZ	100 HZ		10 Hz	20 Hz	50 HZ	100 HZ
		18d21000	50	100	200	203		100	100	80	40.6
		18d21001	50	100	199	396		100	100	79.6	79.2
		18d21002	50	100	250	500		100	100	100	100
		18d21003	50	100	250	500	o	100	100	100	100
		18d21004	50	100	250	500	o	100	100	100	100
		18d21005	50	100	250	500	o	100	100	100	100
		18d21008	50	100	250	500	o	100	100	100	100
		18d21009	50	100	250	500		100	100	100	100
		18d21011	50	100	250	500		100	100	100	100
		18d21012	50	100	250	500		100	100	100	100
		18d21013	50	100	250	500		100	100	100	100
		18d21016	50	100	250	500	o	100	100	100	100
		18d21018	50	100	250	500		100	100	100	100
		ave						100	100	96.8923	93.8308
		n						13	13	13	13
		sem						0	0	2.10404	4.71375

## Sheet: Fluorscence Intensity
		Number	File		dF/F						dF/F
					10 Hz	20 Hz	50 HZ	100 HZ			10 Hz	20 Hz	50 HZ	100 HZ
			18d21000		2.51969	58.5425	50.0675	80.3874			3.13443	72.8255	62.2827	100
			18d21001		2.08613	5.82362	14.4102	48.7387			4.28023	11.9486	29.5663	100
			18d21002		4.05128	4.75602	8.7644	9.31754			43.4802	51.0437	94.0634	100
			18d21003		27.1267	70.7276	255.774	363.401			7.46468	19.4627	70.3834	100
			18d21004		18.7618	61.9768	230.934	333.93			5.61848	18.5598	69.1565	100
			18d21005		12.2826	45.7036	209.981	296.538			4.14199	15.4124	70.811	100
			18d21008		1.98037	2.08424	9.58944	41.2642			4.79924	5.05097	23.2391	100
			18d21009		3.72724	4.58731	13.3635	59.1194			6.3046	7.7594	22.6042	100
			18d21011		15.5842	23.1641	68.489	136.238			11.4389	17.0026	50.2714	100
			18d21012		4.819	16.4676	81.0353	183.569			2.62517	8.97078	44.1442	100
			18d21013		13.9314	40.726	63.6718	118.427			11.7637	34.389	53.7645	100
			18d21016		7.80246	22.8273	65.6569	105.587			7.3896	21.6194	62.1827	100
			18d21018		6.40899	11.021	21.3113	84.099			7.62077	13.1048	25.3407	100
			ave		9.31399	28.339	84.0807	143.124			9.23554	22.8577	52.1393	100
			n		13	13	13	13			13	13	13	13
			sem		2.1454	6.7511	24.5573	32.4068			2.95898	5.36935	6.16948	0
