# Supplementary material for: GABA neurons in the ventral tegmental area regulate non-rapid eye movement sleep in mice
Source: eLife. 2019 Jun 4;8:e44928. doi: 10.7554/eLife.44928 (PMC6548506; doi:10.7554/eLife.44928)
Supplement: Figure 6—source data 1. [file elife-44928-fig6-data1.xlsx]

## Sheet: ChR2 confirmation
	Firing Frequency (Hz)				Firing Frequency (% of baseline)
	Pre	Illumination	Post		Pre	Illumination	Post
	1.6	5	0.8		100	312.5	50
	12	102.778	13.5		100	856.481	112.5
	6.2	71	7		100	1145.16	112.903
	6	14	7		100	233.333	116.667
	8	66	5.8		100	825	72.5
	6.76	51.7556	6.82		100	674.495	92.914
	5	5	5		5	5	5
	1.68095	18.4229	2.02445		0	173.632	13.427

## Sheet: Fir Freq
			-10	-9	-8	-7	-6	-5	-4	-3	-2	-1	0	1	2	3	4	5	6	7	8	9	10	11	12	13	14
	Yellow	ave	2.16667	2.5	2.33333	3	2.5	2.5	2.5	3.16667	2.33333	2.83333	2.83333	2.66667	2.5	2.5	2.5	2.33333	2.33333	2.5	2.16667	2	2.83333	2.5	2.5	2.33333	2.16667
		n	6	6	6	6	6	6	6	6	6	6	6	6	6	6	6	6	6	6	6	6	6	6	6	6	6
		sem	0.401386	0.67082	0.494413	0.516398	0.619139	0.428174	0.619139	0.477261	0.421637	0.477261	0.654047	0.666667	0.619139	0.562731	0.428174	0.666667	0.614636	0.619139	0.792324	0.447214	0.600925	0.5	0.428174	0.666667	0.600925
	Blue 5hz	ave	2	2.14286	2.42857	2.28571	2.28571	2.28571	2.14286	2.28571	2	2.57143	2.14286	1.85714	1.42857	1.42857	1.52857	1.85714	2	1.71429	2.14286	2.28571	1.85714	1.71429	2.28571	2.14286	1.85714
		n	7	7	7	7	7	7	7	7	7	7	7	7	7	7	7	7	7	7	7	7	7	7	7	7	7
		sem	0.723747	0.553283	0.528121	0.714286	0.42056	0.473804	0.508432	0.521641	0.308607	0.428571	0.508432	0.459221	0.480929	0.368856	0.685119	0.670059	0.48795	0.42056	0.404061	0.359516	0.459221	0.359516	0.606092	0.508432	0.594762
	Blue 10hz	ave	2.28571	2.42857	2.57143	2.28571	2	2.75	2.5	2.125	2.5	2.125	1.375	1.25	1.175	1.25	1.125	1.75	1.875	1.875	1.75	1.85714	2.28571	2.14286	2	1.85714	2.57143
		n	7	7	7	7	7	8	8	8	8	8	8	8	8	8	8	8	8	8	8	7	7	7	7	7	7
		sem	0.42056	0.528121	0.81232	0.606092	0.48795	0.453163	0.422577	0.440677	0.46291	0.515388	0.375	0.559017	0.419928	0.453163	0.398098	0.647798	0.398098	0.71807	0.590097	0.63353	0.473804	0.704698	0.534522	0.553283	0.528121
	Blue 20hz	ave	2	2.44444	2	1.66667	2.11111	2.11111	2.11111	2.22222	1.88889	2	0.555556	0.222222	0.222222	0	0.333333	1.33333	1.77778	2.11111	1.88889	1.66667	1.66667	1.77778	2.11111	2.11111	1.88889
		n	9	9	9	9	9	9	9	9	9	9	9	9	9	9	9	9	9	9	9	9	9	9	9	9	9
		sem	0.333333	0.412011	0.62361	0.440959	0.484322	0.388889	0.423099	0.433903	0.388889	0.600925	0.337931	0.222222	0.222222	0	0.333333	0.527046	0.547159	0.611111	0.484322	0.372678	0.440959	0.400617	0.423099	0.351364	0.484322
