# Supplementary material for: GABA neurons in the ventral tegmental area regulate non-rapid eye movement sleep in mice
Source: eLife. 2019 Jun 4;8:e44928. doi: 10.7554/eLife.44928 (PMC6548506; doi:10.7554/eLife.44928)
Supplement: Figure 8—source data 1. [file elife-44928-fig8-data1.xlsx]

## Sheet: hrGFP (10 min)
						-60	-50	-40	-30	-20	-10	0	10	20	30	40	50	60	70	80	90	100	110
					W	100	100	100	100	100	100	100	100	100	100	100	100	100	100	100	100	100	100
					R	0	0	0	0	0	0	0	0	0	0	0	0	0	0	0	0	0	0
					S	0	0	0	0	0	0	0	0	0	0	0	0	0	0	0	0	0	0
					W	100	100	100	100	100	100	100	100	100	100	100	100	100	100	100	100	100	100
					R	0	0	0	0	0	0	0	0	0	0	0	0	0	0	0	0	0	0
					S	0	0	0	0	0	0	0	0	0	0	0	0	0	0	0	0	0	0
					W	100	100	100	100	100	100	89.3	100	100	82	98.7	100	54	100	100	100	100	100
					R	0	0	0	0	0	0	0	0	0	0	0	0	10.7	0	0	0	0	0
					S	0	0	0	0	0	0	10.7	0	0	18	1.3	0	35.3	0	0	0	0	0
					W	62.7	4.7	28.7	14	100	100	100	100	100	100	70	65.3	100	100	100	100	100	100
					R	0	39.3	0	18.7	0	0	0	0	0	0	0	11.3	0	0	0	0	0	0
					S	37.3	56	71.3	67.3	0	0	0	0	0	0	30	23.3	0	0	0	0	0	0
					W	62	100	100	100	100	100	100	100	100	100	100	100	100	100	100	100	100	100
					R	15.3	0	0	0	0	0	0	0	0	0	0	0	0	0	0	0	0	0
					S	22.7	0	0	0	0	0	0	0	0	0	0	0	0	0	0	0	0	0
				W	ave	84.94	80.94	85.74	82.8	100	100	97.86	100	100	96.4	93.74	93.06	90.8	100	100	100	100	100
					n	5	5	5	5	5	5	5	5	5	5	5	5	5	5	5	5	5	5
					sem	9.22299	19.06	14.26	17.2	0	0	2.14	0	0	3.6	5.94034	6.94	9.2	0	0	0	0	0
				R	ave	3.06	7.86	0	3.74	0	0	0	0	0	0	0	2.26	2.14	0	0	0	0	0
					n	5	5	5	5	5	5	5	5	5	5	5	5	5	5	5	5	5	5
					sem	3.06	7.86	0	3.74	0	0	0	0	0	0	0	2.26	2.14	0	0	0	0	0
				S	ave	12	11.2	14.26	13.46	0	0	2.14	0	0	3.6	6.26	4.66	7.06	0	0	0	0	0
					n	5	5	5	5	5	5	5	5	5	5	5	5	5	5	5	5	5	5
					sem	7.70253	11.2	14.26	13.46	0	0	2.14	0	0	3.6	5.94034	4.66	7.06	0	0	0	0	0
				W						R							S
				hrGFP		ChR2				hrGFP		ChR2					hrGFP		ChR2
				ave	sem	ave	sem			ave	sem	ave	sem				ave	sem	ave	sem
				84.94	9.22299	80.6714	12.5773			3.06	3.06	4.67143	3.05869				12	7.70253	14.6714	9.75694
				80.94	19.06	89.6143	6.84566			7.86	7.86	2.47143	2.15658				11.2	11.2	7.91429	5.84345
				85.74	14.26	92.7571	5.66375			0	0	0	0				14.26	14.26	7.24286	5.66375
				82.8	17.2	90.2	5.21057			3.74	3.74	0	0				13.46	13.46	9.8	5.21057
				100	0	100	0			0	0	0	0				0	0	0	0
				100	0	96.7571	2.21723			0	0	0	0				0	0	3.24286	2.21723
				97.86	2.14	69.4286	13.7234			0	0	0	0				2.14	2.14	30.5714	13.7234
				100	0	49.4286	16.7402			0	0	0	0				0	0	50.5714	16.7402
				100	0	53.1429	15.0882			0	0	3.42857	2.25576				0	0	43.4286	13.3708
				96.4	3.6	36.5714	9.81068			0	0	0	0				3.6	3.6	63.4286	9.81068
				93.74	5.94034	40.7571	17.2093			0	0	0.285714	0.285714				6.26	5.94034	58.9571	17.106
				93.06	6.94	42.9571	15.7299			2.26	2.26	5.22857	3.28784				4.66	4.66	51.8143	15.1289
				90.8	9.2	65.0429	15.1759			2.14	2.14	2.67143	2.67143				7.06	7.06	32.2857	14.1518
				100	0	92.9571	6.82865			0	0	2.95714	2.95714				0	0	4.08571	3.87338
				100	0	92.3857	7.61429			0	0	0.285714	0.285714				0	0	7.32857	7.32857
				100	0	92.1	7.9			0	0	1.32857	1.32857				0	0	6.57143	6.57143
				100	0	90.4857	8.66318			0	0	0	0				0	0	9.51429	8.66318
				100	0	99.7143	0.285714			0	0	0	0				0	0	0.285714	0.285714

## Sheet: ChR2 (10 min)
					-60	-50	-40	-30	-20	-10	0	10	20	30	40	50	60	70	80	90	100	110
				W	100	100	100	100	100	100	100	100	32.7	0	2.7	0	23.3	100	100	100	100	100
				R	0	0	0	0	0	0	0	0	0	0	2	0	18.7	0	0	0	0	0
				S	0	0	0	0	0	0	0	0	67.3	100	95.3	100	58	0	0	0	0	0
				W	100	100	60	66.7	100	100	100	84	64	11.3	23.3	0	70	100	100	100	100	100
				R	0	0	0	0	0	0	0	0	0	0	0	4	0	0	0	0	0	0
				S	0	0	40	33.3	0	0	0	16	36	88.7	76.7	96	30	0	0	0	0	0
				W	99.3	100	100	100	100	100	82	14	100	52.7	0	72.7	100	100	100	100	100	100
				R	0	0	0	0	0	0	0	0	0	0	0	9.3	0	0	0	0	0	0
				S	0.7	0	0	0	0	0	18	86	0	47.3	100	18	0	0	0	0	0	0
				W	100	100	100	88.7	100	100	57.3	0	7.3	35.3	100	100	100	100	100	100	94.7	100
				R	0	0	0	0	0	0	0	0	14	0	0	0	0	0	0	0	0	0
				S	0	0	0	11.3	0	0	42.7	100	78.7	64.7	0	0	0	0	0	0	5.3	0
				W	100	100	100	100	100	85.3	100	100	100	36	0	12	0	52	100	100	100	100
				R	0	0	0	0	0	0	0	0	0	0	0	23.3	0	20.7	0	0	0	0
				S	0	0	0	0	0	14.7	0	0	0	64	100	64.7	100	27.3	0	0	0	0
				W	22.7	70	100	100	100	92	6.7	39.3	64	78.7	100	34	62	100	100	100	38.7	98
				R	14	15.3	0	0	0	0	0	0	0	0	0	0	0	0	0	0	0	0
				S	63.3	14.7	0	0	0	8	93.3	60.7	36	21.3	0	66	38	0	0	0	61.3	2
				W	42.7	57.3	89.3	76	100	100	40	8.7	4	42	59.3	82	100	98.7	46.7	44.7	100	100
				R	18.7	2	0	0	0	0	0	0	10	0	0	0	0	0	2	9.3	0	0
				S	38.7	40.7	10.7	24	0	0	60	91.3	86	58	40.7	18	0	1.3	51.3	46	0	0
			W	ave	80.6714	89.6143	92.7571	90.2	100	96.7571	69.4286	49.4286	53.1429	36.5714	40.7571	42.9571	65.0429	92.9571	92.3857	92.1	90.4857	99.7143
				n	7	7	7	7	7	7	7	7	7	7	7	7	7	7	7	7	7	7
				sem	12.5773	6.84566	5.66375	5.21057	0	2.21723	13.7234	16.7402	15.0882	9.81068	17.2093	15.7299	15.1759	6.82865	7.61429	7.9	8.66318	0.285714
			R	ave	4.67143	2.47143	0	0	0	0	0	0	3.42857	0	0.285714	5.22857	2.67143	2.95714	0.285714	1.32857	0	0
				n	7	7	7	7	7	7	7	7	7	7	7	7	7	7	7	7	7	7
				sem	3.05869	2.15658	0	0	0	0	0	0	2.25576	0	0.285714	3.28784	2.67143	2.95714	0.285714	1.32857	0	0
			S	ave	14.6714	7.91429	7.24286	9.8	0	3.24286	30.5714	50.5714	43.4286	63.4286	58.9571	51.8143	32.2857	4.08571	7.32857	6.57143	9.51429	0.285714
				n	7	7	7	7	7	7	7	7	7	7	7	7	7	7	7	7	7	7
				sem	9.75694	5.84345	5.66375	5.21057	0	2.21723	13.7234	16.7402	13.3708	9.81068	17.106	15.1289	14.1518	3.87338	7.32857	6.57143	8.66318	0.285714

## Sheet: Time
		W (sec)				R(sec)				S(sec)
		Pre	Stim	Post		Pre	Stim	Post		Pre	Stim	Post
hrGFP	1	3600	3600	3600		0	0	0		0	0	0		100	0										ave	sem	ave	sem
	2	3600	3600	3600		0	0	0		0	0	0		100	0									pre	3206.4	339.483	3300	129.809
	3	3600	3420	3324		0	0	64		0	180	212		95	0								w	stim	3486.4	76.9478	1753.71	99.0002
	4	1860	3212	3600		348	68	0		1392	320	0		172.688	19.5402									post	3544.8	55.2	3196	128.76
	5	3372	3600	3600		92	0	0		136	0	0		106.762	0
	ave	3206.4	3486.4	3544.8		88	13.6	12.8		305.6	100	42.4		114.89	3.90805									pre	88	67.3973	42.8571	28.24
	n	5	5	5		5	5	5		5	5	5		5	5								r	stim	13.6	13.6	53.7143	18.2022
	sem	339.483	76.9478	55.2		67.3973	13.6	12.8		272.874	65.1153	42.4		14.5701	3.90805									post	12.8	12.8	43.4286	21.4597
	1	3600	1412	3140		0	12	112		0	2176	348		39.2222										pre	305.6	272.874	257.143	106.597
	2	3160	1696	3420		0	24	0		440	1880	180		53.6709									s	stim	100	65.1153	1792.57	108.557
	3	3596	1928	3600		0	56	0		4	1616	0		53.6151										post	42.4	42.4	360.571	114.254
	4	3532	1800	3568		0	84	0		68	1716	32		50.9626
	5	3512	2088	2712		0	140	124		88	1372	764		59.4533
	6	2908	1936	2992		176	0	0		516	1664	608		66.575
	7	2792	1416	2940		124	60	68		684	2124	592		50.7163
	ave	3300	1753.71	3196		42.8571	53.7143	43.4286		257.143	1792.57	360.571		53.4594
	n	7	7	7		7	7	7		7	7	7		7
	sem	129.809	99.0002	128.76		28.24	18.2022	21.4597		106.597	108.557	114.254		3.17906
Two tailed t-Test: Two-Sample Assuming Equal Variances
		0.77	1.52783e-07	0.06
		One way ANOVA post hoc Tukey
		hrGFP
		wake	MeanDiff	SEM	q Value	Prob	Alpha	Sig	LCL	UCL
		stim pre	280	287.77	1.37603	0.60685	0.05	0	-487.728	1047.73
		post pre	338.4	287.77	1.66303	0.48885	0.05	0	-429.328	1106.13
		post stim	58.4	287.77	0.287	0.97759	0.05	0	-709.328	826.128
		REM	MeanDiff	SEM	q Value	Prob	Alpha	Sig	LCL	UCL
		stim pre	-74.4	57.1034	1.84258	0.42027	0.05	0	-226.744	77.9438
		post pre	-75.2	57.1034	1.86239	0.41303	0.05	0	-227.544	77.1438
		post stim	-0.8	57.1034	0.01981	0.99989	0.05	0	-153.144	151.544
		NREM	MeanDiff	SEM	q Value	Prob	Alpha	Sig	LCL	UCL
		stim pre	-205.6	231.658	1.25514	0.658	0.05	0	-823.63	412.43
		post pre	-263.2	231.658	1.60677	0.51132	0.05	0	-881.23	354.83
		post stim	-57.6	231.658	0.35163	0.96659	0.05	0	-675.63	560.43
		ChR2
		Wake	MeanDiff	SEM	q Value	Prob	Alpha	Sig	LCL	UCL
		stim pre	-1546.29	169.765	12.8812	7.28666e-08	0.05	1	-1979.55	-1113.02
		post pre	-104	169.765	0.86636	0.81514	0.05	0	-537.266	329.266
		post stim	1442.29	169.765	12.0148	2.66123e-07	0.05	1	1009.02	1875.55
		REM	MeanDiff	SEM	q Value	Prob	Alpha	Sig	LCL	UCL
		stim pre	10.8571	32.5508	0.4717	0.94072	0.05	0	-72.2173	93.9316
		post pre	0.57143	32.5508	0.02483	0.99983	0.05	0	-82.503	83.6459
		post stim	-10.2857	32.5508	0.44688	0.94661	0.05	0	-93.3602	72.7887
		NREM	MeanDiff	SEM	q Value	Prob	Alpha	Sig	LCL	UCL
		stim pre	1535.43	155.352	13.9774	0	0.05	1	1138.95	1931.91
		post pre	103.429	155.352	0.94154	0.78594	0.05	0	-293.054	499.911
		post stim	-1432	155.352	13.0359	5.51014e-08	0.05	1	-1828.48	-1035.52

## Sheet: Percent summary
		W						R							S
		hrGFP		ChR2				hrGFP		ChR2					hrGFP		ChR2
		ave	sem	ave	sem			ave	sem	ave	sem				ave	sem	ave	sem
		84.94	9.22299	80.6714	12.5773			3.06	3.06	4.67143	3.05869				12	7.70253	14.6714	9.75694
		80.94	19.06	89.6143	6.84566			7.86	7.86	2.47143	2.15658				11.2	11.2	7.91429	5.84345
		85.74	14.26	92.7571	5.66375			0	0	0	0				14.26	14.26	7.24286	5.66375
		82.8	17.2	90.2	5.21057			3.74	3.74	0	0				13.46	13.46	9.8	5.21057
		100	0	100	0			0	0	0	0				0	0	0	0
		100	0	96.7571	2.21723			0	0	0	0				0	0	3.24286	2.21723
		97.86	2.14	69.4286	13.7234			0	0	0	0				2.14	2.14	30.5714	13.7234
		100	0	49.4286	16.7402			0	0	0	0				0	0	50.5714	16.7402
		100	0	53.1429	15.0882			0	0	3.42857	2.25576				0	0	43.4286	13.3708
		96.4	3.6	36.5714	9.81068			0	0	0	0				3.6	3.6	63.4286	9.81068
		93.74	5.94034	40.7571	17.2093			0	0	0.285714	0.285714				6.26	5.94034	58.9571	17.106
		93.06	6.94	42.9571	15.7299			2.26	2.26	5.22857	3.28784				4.66	4.66	51.8143	15.1289
		90.8	9.2	65.0429	15.1759			2.14	2.14	2.67143	2.67143				7.06	7.06	32.2857	14.1518
		100	0	92.9571	6.82865			0	0	2.95714	2.95714				0	0	4.08571	3.87338
		100	0	92.3857	7.61429			0	0	0.285714	0.285714				0	0	7.32857	7.32857
		100	0	92.1	7.9			0	0	1.32857	1.32857				0	0	6.57143	6.57143
		100	0	90.4857	8.66318			0	0	0	0				0	0	9.51429	8.66318
		100	0	99.7143	0.285714			0	0	0	0				0	0	0.285714	0.285714

## Sheet: hrGFP (1 min)
						-60	-59	-58	-57	-56	-55	-54	-53	-52	-51	-50	-49	-48	-47	-46	-45	-44	-43	-42	-41	-40	-39	-38	-37	-36	-35	-34	-33	-32	-31	-30	-29	-28	-27	-26	-25	-24	-23	-22	-21	-20	-19	-18	-17
					W	100	100	100	100	100	100	100	100	100	100	100	100	100	100	100	100	100	100	100	100	100	100	100	100	100	100	100	100	100	100	100	100	100	100	100	100	100	100	100	100	100	100	100	100
					R	0	0	0	0	0	0	0	0	0	0	0	0	0	0	0	0	0	0	0	0	0	0	0	0	0	0	0	0	0	0	0	0	0	0	0	0	0	0	0	0	0	0	0	0
					S	0	0	0	0	0	0	0	0	0	0	0	0	0	0	0	0	0	0	0	0	0	0	0	0	0	0	0	0	0	0	0	0	0	0	0	0	0	0	0	0	0	0	0	0
					W	100	100	100	100	100	100	100	100	100	100	100	100	100	100	100	100	100	100	100	100	100	100	100	100	100	100	100	100	100	100	100	100	100	100	100	100	100	100	100	100	100	100	100	100
					R	0	0	0	0	0	0	0	0	0	0	0	0	0	0	0	0	0	0	0	0	0	0	0	0	0	0	0	0	0	0	0	0	0	0	0	0	0	0	0	0	0	0	0	0
					S	0	0	0	0	0	0	0	0	0	0	0	0	0	0	0	0	0	0	0	0	0	0	0	0	0	0	0	0	0	0	0	0	0	0	0	0	0	0	0	0	0	0	0	0
					W	100	100	100	100	100	100	100	100	100	100	100	100	100	100	100	100	100	100	100	100	100	100	100	100	100	100	100	100	100	100	100	100	100	100	100	100	100	100	100	100	100	100	100	100
					R	0	0	0	0	0	0	0	0	0	0	0	0	0	0	0	0	0	0	0	0	0	0	0	0	0	0	0	0	0	0	0	0	0	0	0	0	0	0	0	0	0	0	0	0
					S	0	0	0	0	0	0	0	0	0	0	0	0	0	0	0	0	0	0	0	0	0	0	0	0	0	0	0	0	0	0	0	0	0	0	0	0	0	0	0	0	0	0	0	0
					W	100	100	100	100	100	100	26.7	0	0	0	0	0	0	0	0	0	0	0	0	46.7	100	100	86.7	0	0	0	0	0	0	0	0	0	0	0	0	0	0	0	40	100	100	100	100	100
					R	0	0	0	0	0	0	0	0	0	0	0	0	0	0	0	40	100	100	100	53.3	0	0	0	0	0	0	0	0	0	0	0	0	0	0	0	0	26.7	100	60	0	0	0	0	0
					S	0	0	0	0	0	0	73.3	100	100	100	100	100	100	100	100	60	0	0	0	0	0	0	13.3	100	100	100	100	100	100	100	100	100	100	100	100	100	73.3	0	0	0	0	0	0	0
					W	60	0	0	0	60	100	100	100	100	100	100	100	100	100	100	100	100	100	100	100	100	100	100	100	100	100	100	100	100	100	100	100	100	100	100	100	100	100	100	100	100	100	100	100
					R	0	0	13.3	100	40	0	0	0	0	0	0	0	0	0	0	0	0	0	0	0	0	0	0	0	0	0	0	0	0	0	0	0	0	0	0	0	0	0	0	0	0	0	0	0
					S	40	100	86.7	0	0	0	0	0	0	0	0	0	0	0	0	0	0	0	0	0	0	0	0	0	0	0	0	0	0	0	0	0	0	0	0	0	0	0	0	0	0	0	0	0
				W	ave	92	80	80	80	92	100	85.34	80	80	80	80	80	80	80	80	80	80	80	80	89.34	100	100	97.34	80	80	80	80	80	80	80	80	80	80	80	80	80	80	80	88	100	100	100	100	100
					n	5	5	5	5	5	5	5	5	5	5	5	5	5	5	5	5	5	5	5	5	5	5	5	5	5	5	5	5	5	5	5	5	5	5	5	5	5	5	5	5	5	5	5	5
					sem	8	20	20	20	8	0	14.66	20	20	20	20	20	20	20	20	20	20	20	20	10.66	0	0	2.66	20	20	20	20	20	20	20	20	20	20	20	20	20	20	20	12	0	0	0	0	0
				R	ave	0	0	2.66	20	8	0	0	0	0	0	0	0	0	0	0	8	20	20	20	10.66	0	0	0	0	0	0	0	0	0	0	0	0	0	0	0	0	5.34	20	12	0	0	0	0	0
					n	5	5	5	5	5	5	5	5	5	5	5	5	5	5	5	5	5	5	5	5	5	5	5	5	5	5	5	5	5	5	5	5	5	5	5	5	5	5	5	5	5	5	5	5
					sem	0	0	2.66	20	8	0	0	0	0	0	0	0	0	0	0	8	20	20	20	10.66	0	0	0	0	0	0	0	0	0	0	0	0	0	0	0	0	5.34	20	12	0	0	0	0	0
				S	ave	8	20	17.34	0	0	0	14.66	20	20	20	20	20	20	20	20	12	0	0	0	0	0	0	2.66	20	20	20	20	20	20	20	20	20	20	20	20	20	14.66	0	0	0	0	0	0	0
					n	5	5	5	5	5	5	5	5	5	5	5	5	5	5	5	5	5	5	5	5	5	5	5	5	5	5	5	5	5	5	5	5	5	5	5	5	5	5	5	5	5	5	5	5
					sem	8	20	17.34	0	0	0	14.66	20	20	20	20	20	20	20	20	12	0	0	0	0	0	0	2.66	20	20	20	20	20	20	20	20	20	20	20	20	20	14.66	0	0	0	0	0	0	0
[truncated: 136 more columns]

## Sheet: ChR2 (1min)
					-60	-59	-58	-57	-56	-55	-54	-53	-52	-51	-50	-49	-48	-47	-46	-45	-44	-43	-42	-41	-40	-39	-38	-37	-36	-35	-34	-33	-32	-31	-30	-29	-28	-27	-26	-25	-24	-23	-22	-21	-20	-19	-18	-17	-16
				W	100	100	100	100	100	100	100	100	100	100	100	100	100	100	100	100	100	100	100	100	100	100	100	100	100	100	100	100	100	100	100	100	100	100	100	100	100	100	100	100	100	100	100	100	100
				R	0	0	0	0	0	0	0	0	0	0	0	0	0	0	0	0	0	0	0	0	0	0	0	0	0	0	0	0	0	0	0	0	0	0	0	0	0	0	0	0	0	0	0	0	0
				S	0	0	0	0	0	0	0	0	0	0	0	0	0	0	0	0	0	0	0	0	0	0	0	0	0	0	0	0	0	0	0	0	0	0	0	0	0	0	0	0	0	0	0	0	0
				W	100	100	100	100	100	100	100	100	100	100	100	100	100	100	100	100	100	100	100	100	100	100	100	100	100	100	0	0	0	0	0	0	0	66.7	100	100	100	100	100	100	100	100	100	100	100
				R	0	0	0	0	0	0	0	0	0	0	0	0	0	0	0	0	0	0	0	0	0	0	0	0	0	0	0	0	0	0	0	0	0	0	0	0	0	0	0	0	0	0	0	0	0
				S	0	0	0	0	0	0	0	0	0	0	0	0	0	0	0	0	0	0	0	0	0	0	0	0	0	0	100	100	100	100	100	100	100	33.3	0	0	0	0	0	0	0	0	0	0	0
				W	93.3	100	100	100	100	100	100	100	100	100	100	100	100	100	100	100	100	100	100	100	100	100	100	100	100	100	100	100	100	100	100	100	100	100	100	100	100	100	100	100	100	100	100	100	100
				R	0	0	0	0	0	0	0	0	0	0	0	0	0	0	0	0	0	0	0	0	0	0	0	0	0	0	0	0	0	0	0	0	0	0	0	0	0	0	0	0	0	0	0	0	0
				S	6.7	0	0	0	0	0	0	0	0	0	0	0	0	0	0	0	0	0	0	0	0	0	0	0	0	0	0	0	0	0	0	0	0	0	0	0	0	0	0	0	0	0	0	0	0
				W	100	100	100	100	100	100	100	100	100	100	100	100	100	100	100	100	100	100	100	100	100	100	100	100	100	100	100	100	100	100	100	100	100	100	100	100	100	100	13.3	73.3	100	100	100	100	100
				R	0	0	0	0	0	0	0	0	0	0	0	0	0	0	0	0	0	0	0	0	0	0	0	0	0	0	0	0	0	0	0	0	0	0	0	0	0	0	0	0	0	0	0	0	0
				S	0	0	0	0	0	0	0	0	0	0	0	0	0	0	0	0	0	0	0	0	0	0	0	0	0	0	0	0	0	0	0	0	0	0	0	0	0	0	86.7	26.7	0	0	0	0	0
				W	100	100	100	100	100	100	100	100	100	100	100	100	100	100	100	100	100	100	100	100	100	100	100	100	100	100	100	100	100	100	100	100	100	100	100	100	100	100	100	100	100	100	100	100	100
				R	0	0	0	0	0	0	0	0	0	0	0	0	0	0	0	0	0	0	0	0	0	0	0	0	0	0	0	0	0	0	0	0	0	0	0	0	0	0	0	0	0	0	0	0	0
				S	0	0	0	0	0	0	0	0	0	0	0	0	0	0	0	0	0	0	0	0	0	0	0	0	0	0	0	0	0	0	0	0	0	0	0	0	0	0	0	0	0	0	0	0	0
				W	0	0	20	0	0	33.3	0	40	100	33.3	0	0	0	100	100	100	100	100	100	100	100	100	100	100	100	100	100	100	100	100	100	100	100	100	100	100	100	100	100	100	100	100	100	100	100
				R	0	0	40	0	0	0	40	60	0	0	0	53.3	100	0	0	0	0	0	0	0	0	0	0	0	0	0	0	0	0	0	0	0	0	0	0	0	0	0	0	0	0	0	0	0	0
				S	100	100	40	100	100	66.7	60	0	0	66.7	100	46.7	0	0	0	0	0	0	0	0	0	0	0	0	0	0	0	0	0	0	0	0	0	0	0	0	0	0	0	0	0	0	0	0	0
				W	0	40	100	6.7	0	0	6.7	100	100	73.3	0	20	0	0	53.3	100	100	100	100	100	100	100	100	100	100	100	100	100	73.3	20	0	20	40	100	100	100	100	100	100	100	100	100	100	100	100
				R	0	0	0	0	0	93.3	93.3	0	0	0	0	0	0	0	20	0	0	0	0	0	0	0	0	0	0	0	0	0	0	0	0	0	0	0	0	0	0	0	0	0	0	0	0	0	0
				S	100	60	0	93.3	100	6.7	0	0	0	26.7	100	80	100	100	26.7	0	0	0	0	0	0	0	0	0	0	0	0	0	26.7	80	100	80	60	0	0	0	0	0	0	0	0	0	0	0	0
			W	ave	70.4714	77.1429	88.5714	72.3857	71.4286	76.1857	72.3857	91.4286	100	86.6571	71.4286	74.2857	71.4286	85.7143	93.3286	100	100	100	100	100	100	100	100	100	100	100	85.7143	85.7143	81.9	74.2857	71.4286	74.2857	77.1429	95.2429	100	100	100	100	87.6143	96.1857	100	100	100	100	100
				n	7	7	7	7	7	7	7	7	7	7	7	7	7	7	7	7	7	7	7	7	7	7	7	7	7	7	7	7	7	7	7	7	7	7	7	7	7	7	7	7	7	7	7	7	7
				sem	18.2191	15.3862	11.4286	17.8399	18.4428	15.7956	17.8399	8.57143	0	9.65544	18.4428	16.7413	18.4428	14.2857	6.67143	0	0	0	0	0	0	0	0	0	0	0	14.2857	14.2857	14.1586	16.7413	18.4428	16.7413	15.3862	4.75714	0	0	0	0	12.3857	3.81429	0	0	0	0	0
			R	ave	0	0	5.71429	0	0	13.3286	19.0429	8.57143	0	0	0	7.61429	14.2857	0	2.85714	0	0	0	0	0	0	0	0	0	0	0	0	0	0	0	0	0	0	0	0	0	0	0	0	0	0	0	0	0	0
				n	7	7	7	7	7	7	7	7	7	7	7	7	7	7	7	7	7	7	7	7	7	7	7	7	7	7	7	7	7	7	7	7	7	7	7	7	7	7	7	7	7	7	7	7	7
				sem	0	0	5.71429	0	0	13.3286	13.5984	8.57143	0	0	0	7.61429	14.2857	0	2.85714	0	0	0	0	0	0	0	0	0	0	0	0	0	0	0	0	0	0	0	0	0	0	0	0	0	0	0	0	0	0
			S	ave	29.5286	22.8571	5.71429	27.6143	28.5714	10.4857	8.57143	0	0	13.3429	28.5714	18.1	14.2857	14.2857	3.81429	0	0	0	0	0	0	0	0	0	0	0	14.2857	14.2857	18.1	25.7143	28.5714	25.7143	22.8571	4.75714	0	0	0	0	12.3857	3.81429	0	0	0	0	0
				n	7	7	7	7	7	7	7	7	7	7	7	7	7	7	7	7	7	7	7	7	7	7	7	7	7	7	7	7	7	7	7	7	7	7	7	7	7	7	7	7	7	7	7	7	7
				sem	18.2191	15.3862	5.71429	17.8399	18.4428	9.41646	8.57143	0	0	9.65544	18.4428	12.2354	14.2857	14.2857	3.81429	0	0	0	0	0	0	0	0	0	0	0	14.2857	14.2857	14.1586	16.7413	18.4428	16.7413	15.3862	4.75714	0	0	0	0	12.3857	3.81429	0	0	0	0	0
[truncated: 135 more columns]
